# Supplementary material for: In Situ NMR and Kinetics Reveal Origins of Regioselectivity Differences for Epichlorohydrin Ring-Opening in Lewis and Brønsted Acid Zeolites
Source: Research Square preprint supplement (doi:10.21203/rs.3.rs-6372256/v1), 2025-04-30
Supplement: Supplementary file 1 [file 626e835550ec934c20cf14ce.docx]

*In Situ* NMR and Kinetics Reveal Origins of Regioselectivity Differences for Epichlorohydrin Ring-Opening in Lewis and Brønsted Acid Zeolites

David S. Potts,1 Huston Locht,1,2 Sungmin Kim,3 Johannes Lercher,3,4 Jian Zhi Hu,3,5*

David W. Flaherty1,2*

1Department of Chemical and Biomolecular Engineering

University of Illinois Urbana-Champaign, Urbana, Illinois 61801 (USA)

2School of Chemical and Biomolecular Engineering

Georgia Institute of Technology, Atlanta, Georgia 30332 (USA)

3Institute for Integrated Catalysis

Pacific Northwest National Laboratory, Richland, Washington 99352 (USA)

4Department of Chemistry and Catalysis Research Center, TU München, Lichtenbergstrasse 4, 85748 Garching, Germany

5The Gene & Linda Voiland School of Chemical Engineering and Bioengineering, Washington State University, Pullman, WA 99164, United States

Corresponding author e-mails: [jianzhi.hu@pnnl.gov](mailto:jianzhi.hu@pnnl.gov), [dflaherty3@gatech.edu](mailto:dflaherty3@gatech.edu)

**S1. Inductive Effects in Epoxide Ring-Opening**


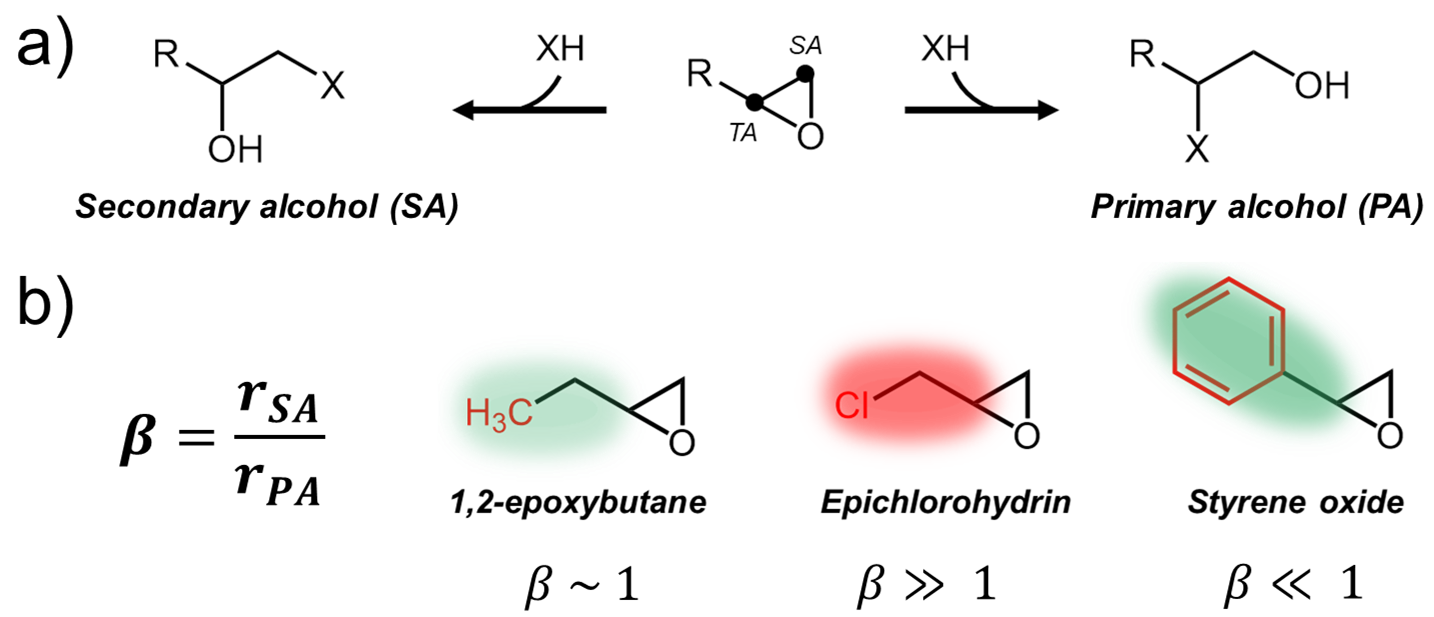


**Scheme S1**. a) Stoichiometric reaction for epoxide ring-opening with a nucleophile (XH), where either a secondary or primary alcohol product may form. b)Structures for 1,2-epoxybutane (a representative aliphatic epoxide with terminal methyl group), epichlorohydrin, and styrene oxide which illustrate an electron withdrawing effect (red shading) and electron donating effect (green shading), where a more intense shading indicates a stronger effect. These inductive effects significantly influence ratios of rates to form each isomer as quantified by values of  *β*.

Note that the terminal ether (TE) formed during epoxide ring-opening with alcohols is a secondary alcohol, while the terminal alcohol (TA) product is a primary alcohol.

**S2. Catalyst Characterization**

| Catalyst | M wt%a | Si:Ma | Si:Ala | Band Gap (eV)b | c | Active Metal (%)d |
| --- | --- | --- | --- | --- | --- | --- |
| Al-BEA | 0.59 | 75 | 75 | -- | 1.56 | 97 ± 4 |
| Sn-BEA | 1.35 | 143 | 3950 | 5.2 | 1.51 | 93 ± 6 |
| **Table S1.** Characterization of the Chemical, Physical, and Electronic Properties of M-BEA.  aMeasured with ICP-OES. bExtracted from leading edge of Tauc plot from DRUV-vis. cCalculated from infrared transmission spectra  of dehydrated M-BEA samples. dMeasured from *in situ* 1,2-diphenylethylenediamine site titrations. | | | | | | | |  |  |  |  |  | 104 ± 7 |
|  | | | | | | | |  |  |  |  |  | 96 ± 2 |

c

Table S1 summarizes the key material properties of the M-BEA materials, the calculation methods of which are described in the characterization subsections below.

**S2.1 Diffuse Reflectance UV-Vis Spectra to Examine Dispersity of Active Sites**


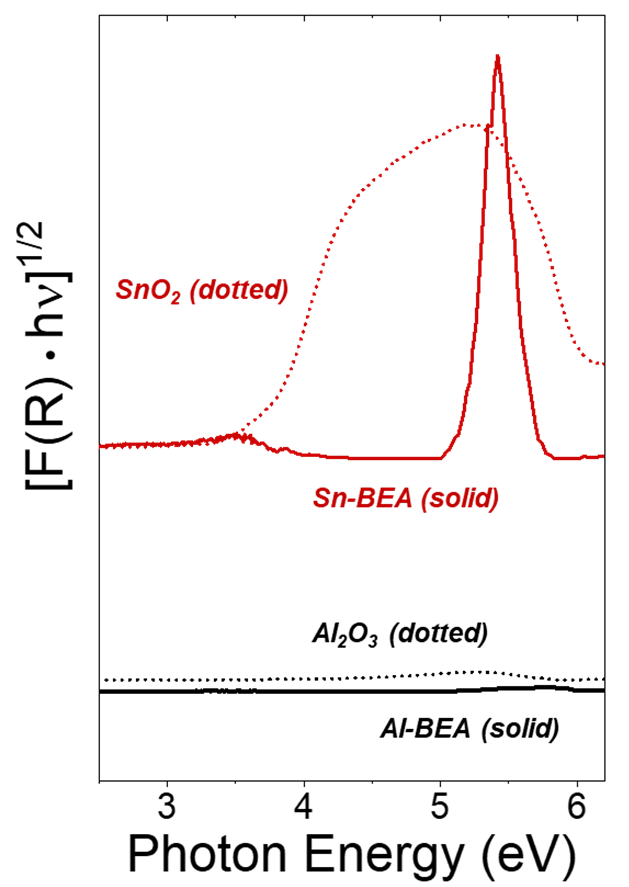


**Figure S1**. Tauc plots obtained with a UV-Vis spectrophotometer at ambient conditions for M-BEA (solid lines; Al (), Zr ()) and the respective metal oxides (dotted lines; γ-Al2O3 (**--**), SnO2 (**--**)). UV-Vis spectra were obtained from 200 to 800 nm. Tauc plots were normalized to the most intense features and are vertically offset for clarity.

The band gaps for each M-BEA and the respective metal oxides were obtained by extrapolating the linear absorbance region of the Tauc plot in Figure S1 to the baseline. The intersection of the baseline and linear region equals the band gap photon energy. Al-BEA and γ-Al2O3 show negligible features within the region of photon energies examined, consistent with reported band gaps greater than 7 eV for γ-Al2O3.1-2 Table S2 reveals that the band gaps for Sn-BEA is greater than the band gaps for the metal oxides, providing evidence that the metal atoms are well dispersed in the *BEA framework.

The photon energy *E* in electron volts (eV) was obtained from the wavelength as follows:

where is the wavelength of the photon in nanometers, and *h* equals the Planck constant. The ordinate from Figure S1 was obtained from the ordinate of the raw spectra, the percent reflectance (% R). The Kubelka-Munk function (*F(R))* was calculated from % R:

F(R) was then multiplied by the photon energy, and taking the square root of the resulting quantity yielded the ordinate for Figure S1.

| Catalyst | M-BEA  Band Gap (eV) | Metal Oxide Band Gap (eV) |
| --- | --- | --- |
| Al-BEA | -- | -- |
| Sn-BEA | 5.2 | 3.9 |

**Table S2**. Calculated band gaps for M-BEA and metal oxide materials. The band gaps for Al-BEA and Al2O3 likely exceed the regime of wavelengths possible to measure on the UV-Vis spectrophotometer.


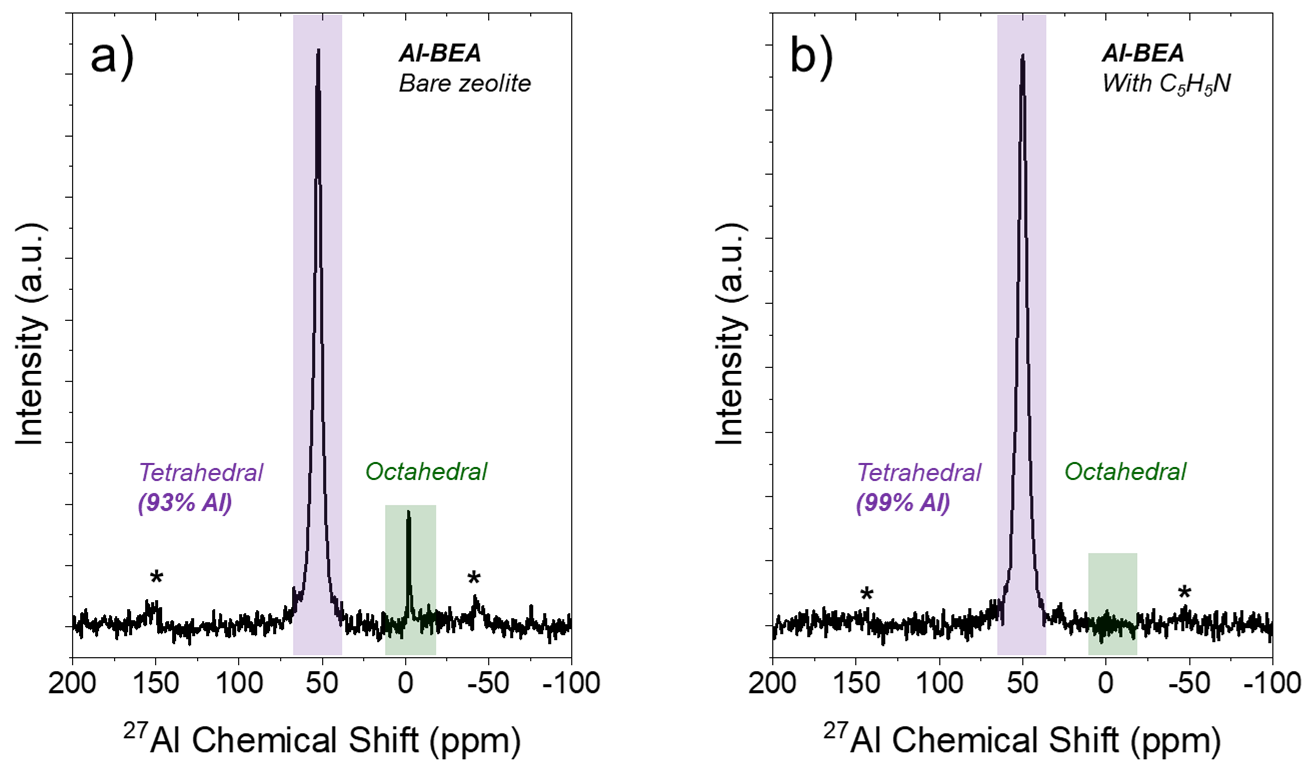
**S2.2 27Al NMR Spectra to Elucidate Al Coordination in Al-BEA**

**Figure S2.** 27Al NMR spectra for a) bare Al-BEA and b) Al-BEA impregnated with C5H5N (298 K). The peaks representing tetrahedrally and octahedrally coordinated Al species are highlighted in purple and green, respectively. The calculated percentage of tetrahedral Al is shown in bold. Asterisks represent spinning side-band features.

Figure S2 presents the 27Al NMR spectra for Al-BEA in the presence and absence of liquid pyridine (C5H5N). The percentage of tetrahedral Al shown in the figure was calculated from the ratio of the tetrahedral to octahedral peak area features. Notably, the bare zeolite shows a greater percentage of octahedral Al than the materials impregnated with C5H5N. Liquid or vapor water (H2O) binds to tetrahedral Al atoms and gives rise to octahedral 27Al NMR features, which reflects the additional coordination of two H2O molecules.3-5 H2O adsorbed from the atmosphere likely contributes to the larger quantity of octahedral Al observed in the bare zeolite. Previous works found that loading hydrated Brønsted acid zeolites with ammonia (NH3) converts octahedral Al species back to tetrahedral Al sites,5-7 making the adsorption of a strong Brønsted base a reliable strategy to report octahedral Al content without interference from H2O

Motivated by the role of NH3 shown in previous studies, we impregnated the Al-BEA materials with liquid C5H5N to revert hydrated Al species to tetrahedral Al atoms. Figure S2 shows that the C5H5N-incorporated Al-BEA material shows lower quantities of octahedral Al (1%) than the bare materials (7%). The value for the C5H5N-incorporated Al-BEA aligns closely with the value of 3% obtained from active site titrations (Section S6, *vide infra*). Overall, the spectra in Figure S2 support that Al-BEAcontains minor quantities of octahedral Al that do not convolute the kinetics reported in the main text**.**


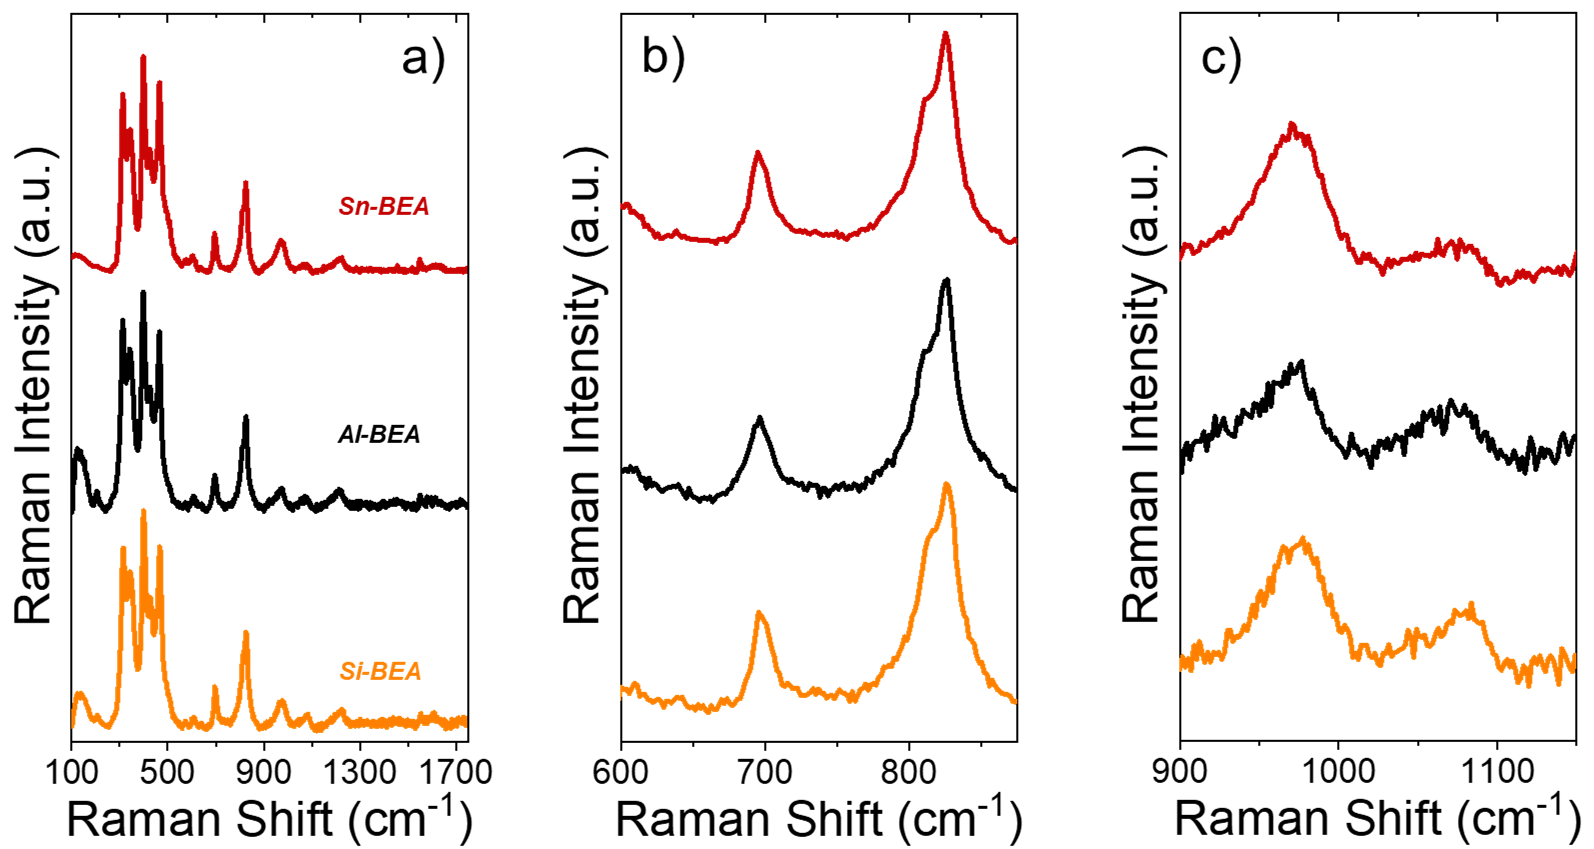
**S2.3 *Ex situ* Raman Spectra to Determine Metal Coordination in M-BEA**

**Figure S3.** *Ex situ* Raman spectra of M-BEA (Sn (red), Al (black), Si (orange)) at (a) the full range of Raman shifts examined, (b) magnified view of the range of 600-875 cm-1, and (c) magnified view of the 900-1150 cm-1 region. The spectra were taken at ambient conditions with a Raman spectrometer (Renishaw, InVia) equipped with a 532 nm laser that delivered a power density of ~2 mW μm-2. The spectra are an average of 10 scans with an exposure time of 20 s. Spectra are normalized by the maximum feature at ~400 cm-1 and are vertically offset for clarity.

Figure S3a reveals that each M-BEA and Si-BEA possess similar Raman spectra. The intense peaks between 250 and 550 cm-1 represent features of the *BEA framework: the peaks at 315 and 345 cm-1 represent six-membered rings, the peaks at 400 and 425 cm-1 represent five-membered rings, and the peak at 465 cm-1 represents four-membered rings characteristic of the *BEA framework.8-9 The peak at ~695 cm-1 has previously been reported on spectra of *BEA zeolites and may originate from the *BEA framework.10-11 The peak at ~820 cm-1 represents a symmetric skeletal mode of microporous silicates.12-13

Both M-BEA show a feature at 144 cm-1. The feature is also present in Si-BEA, suggesting the feature results from a mode inherent to the *BEA framework. Alternatively, the feature may be an artifact of the Raman filter used to suppress signal from Rayleigh scattering. Figure S3b zooms into a region in which Al2O3 (640, 751 cm-1)14-16 and SnO2 (632, 773 cm-1)17-19 have been reported to show Raman features. Both M-BEA show nearly identical spectra in this region, with no notable features where the respective metal oxides contain features. This supports that both M-BEA do not contain oligomeric metal oxide structures.

Figure S3c shows that each M-BEA possesses features at ~960 and ~1080 cm-1. The feature at ~960 cm-1 has been attributed to silanol defects.20-22 The peak at ~1080 cm-1 plausibly originates from the *BEA framework. Ti-O-Si features have been commonly reported in the literature at ~960 and ~1125 cm-1, respectively.23-26 However, similar features have not been well reported for Al- or Sn-containing zeolites. Therefore, the presence of each metal in the framework cannot be confirmed with Raman spectra but is indirectly supported by the absence of metal oxide features.

The Raman spectra in Figure S3 suggest that the Al and Sn atoms within M-BEA predominately reside at tetrahedral framework positions within the *BEA zeolite framework.

**S2.4 X-Ray Diffraction to Confirm Crystallinity of M-BEA**


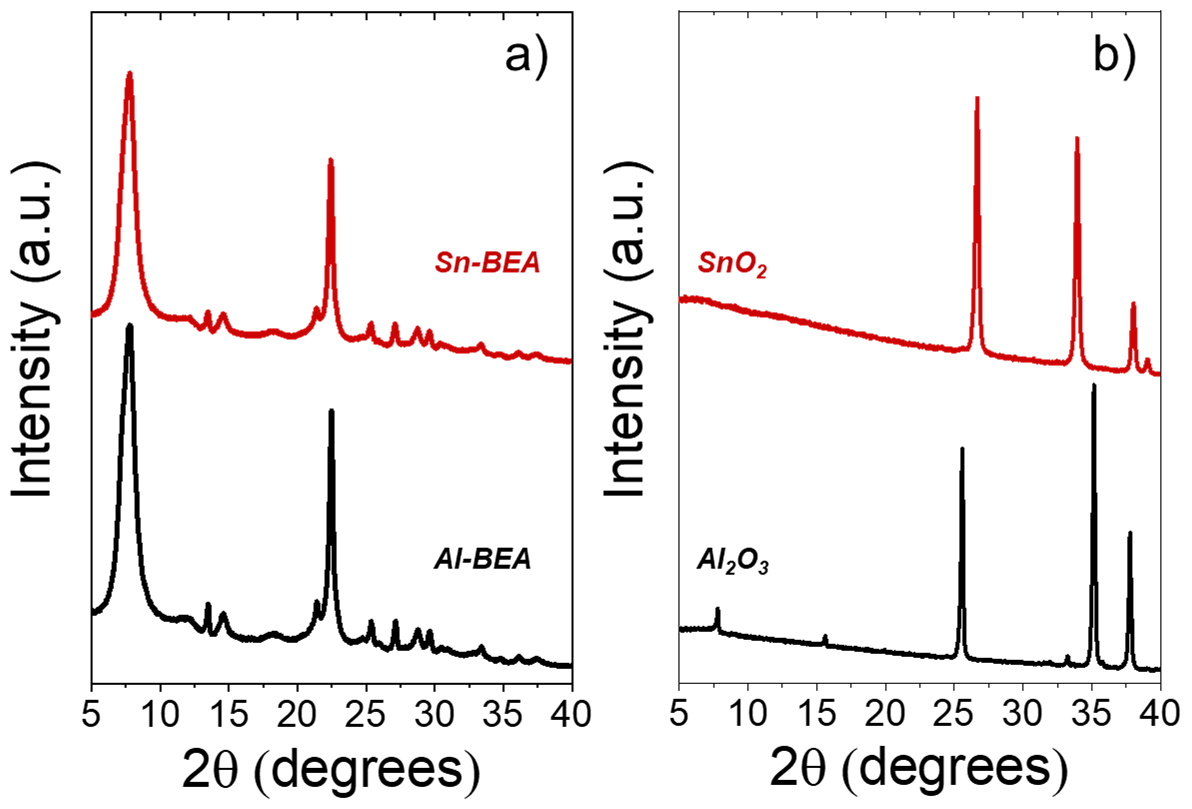


**Figure S4.** Powder X-ray diffractograms obtained with Cu Kα radiation (0.15418 nm) under ambient conditions for a) M-BEA (Al (black), Sn (red)) and b) the corresponding bulk metal oxides (γ-Al2O3 (black), SnO2 (red)). Spectra are vertically offset for clarity.

The crystallographic features for each M-BEA are representative of the *BEA framework.27 As displayed in Figure S4a, each M-BEA material shows weak features around 25.5, 27, 29, and 33 degrees. The broad feature at ~22.5 degrees suggests a small crystallite size28 and the presence of internal (SiOH)x defects formed by the dealumination of the parent Al-BEA material (Si:Al = 20).

Figure S4b reveals that several of these peak locations coincide with strong features in the diffractograms of at least one of the metal oxides. However, the presence of weak features at these positions in all M-BEA suggests that the features are characteristic of the *BEA framework, rather than originating from the presence of metal oxide. Overall, the XRD patterns in Figure S4 support that each M-BEA possesses the crystalline *BEA framework, with minimal to no detectable metal oxide crystallites present.

**S2.5 Infrared Spectra to Measure Silanol Density of M-BEA**


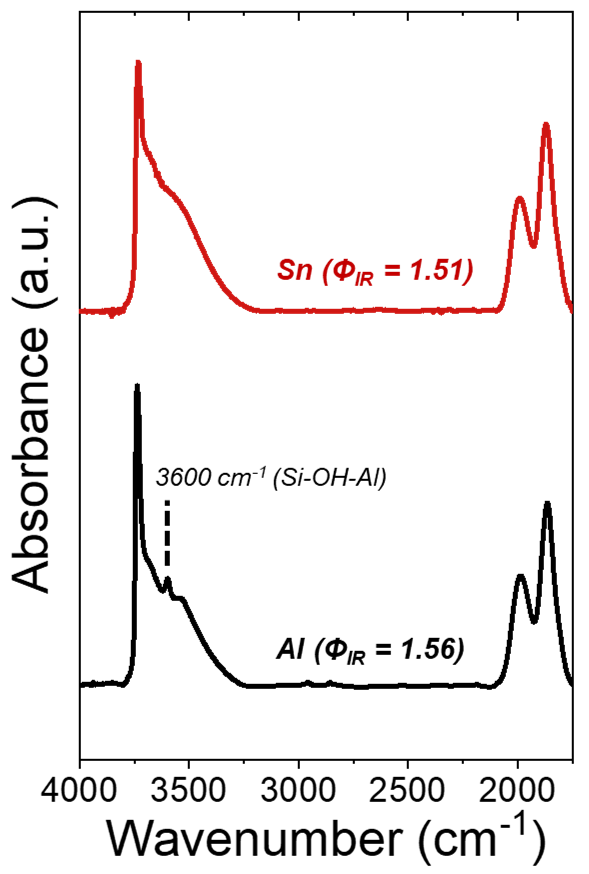


**Figure S5.** Infrared spectra of dehydrated samples of M-BEA (Sn (red), Al (black)). The samples were dehydrated under flowing Ar (101 kPa He, 50 cm3 min-1) at 573 K prior to measurement. Spectra are vertically offset for clarity.

The greater *v*(O-H) areas (3300-3750 cm-1) for each M-BEA-OH compared to M-BEA-F, with respect to the *v*(Si-O-Si) area (1800-2100 cm-1), shows that the M-BEA-OH materials possess a greater density of (SiOH)x groups than the M-BEA-F materials. The ΦIR values in Table S1 were calculated by peak fitting on Origin 2021 (OriginLab Corporation). The peak areas for *v*(O-H) and *v*(Si-O-Si) were calculated with Gaussian fits (example shown in Figure S6).

As shown in Equation 8 in the main text, the equation to calculate ΦIR is:

(S1)

The red, purple, and orange peaks represent networked SiOH features which are summed to determine Av(O-H). The green and brown peaks in the Si-O-Si region were summed together to get . The blue peak in *v*(O-H) represents isolated SiOH features, so these peak areas were excluded from the ΦIR calculations.

**
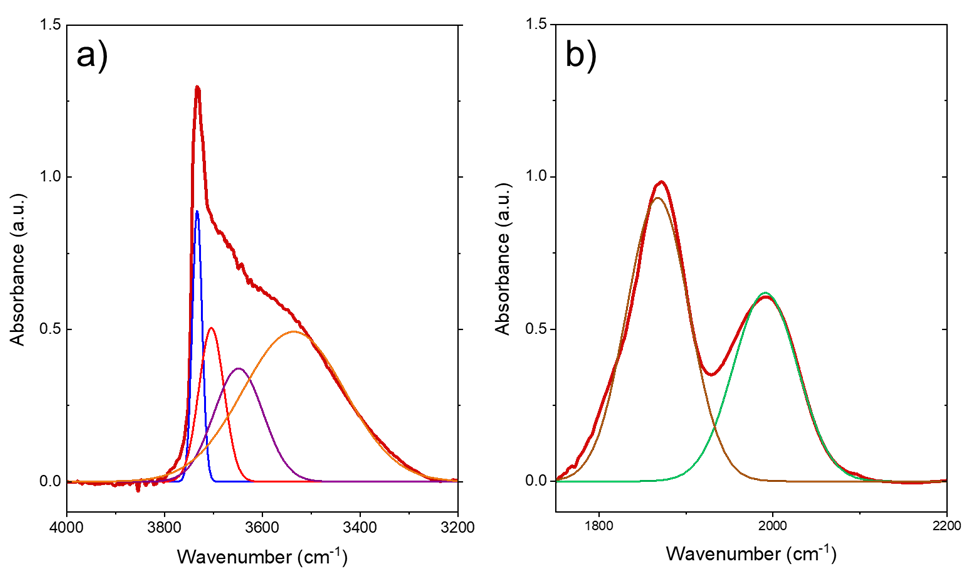
**

**Figure S6.** Fitted peaks for the (a) networked (red, purple, orange) and isolated (blue) Si-OH region and (b) Si-O-Si overtones at 1865 (brown) and 2000 cm-1 (green) for Sn-BEA.

**S2.6 Calculation of (SiOH)x (unit cell)-1 for M-BEA**

The density of (SiOH)x per unit cell was estimated based on the initial quantity of Al present in the commercial zeolite (Si:Al = 20). A *BEA unit cell contains 64 T atoms (i.e., Si, Al, or Sn), so the initial quantity of Al per unit cell equals 3.047:

Assuming all Al atoms are removed in the thorough dealumination treatment for Sn-BEA, the dealumination produces 3.047 (SiOH)x (unit cell)-1. The metal weight loading allows for the calculation of the Si:M ratio for each M-BEA:

This can be used to calculate the number of metal atoms per unit cell incorporated into the formed (SiOH)x. The final (SiOH)x (unit cell)-1 for Sn-BEA is equal to the initial amount of Al (assumed that all Al is removed) subtracted by the added Sn. In contrast, the (SiOH)x (unit cell)-1 for the Brønsted acid equals the initial quantity of Al subtracted by the amount of Al removed:

Table S3 reports metal loadings per unit cell from ICP and calculated (SiOH)x per unit cell. The calculated values predict a wider range of zeolite hydrophilicity than the ΦIR calculations in Section S2.5. However, rates depend weakly on metal loading (Section S4, *vide infra*), and therefore (SiOH)x (unit cell)-1, within the range of loadings examined for M-BEA.

| Catalyst | M (unit cell)-1 | (SiOH)x (unit cell)-1 |
| --- | --- | --- |
| Al-BEA-OH | 0.86 | 2.17 |
| Zr-BEA-OH | 0.47 | 2.57 |

**Table S3**. Metal loadings and (SiOH)x per unit cell, determined from metal loadings from ICP and estimated Al removed by dealumination treatments.

**S2.7 CD3CN and C5H5N Infrared Adsorption Spectra to Examine Acid Site Character**


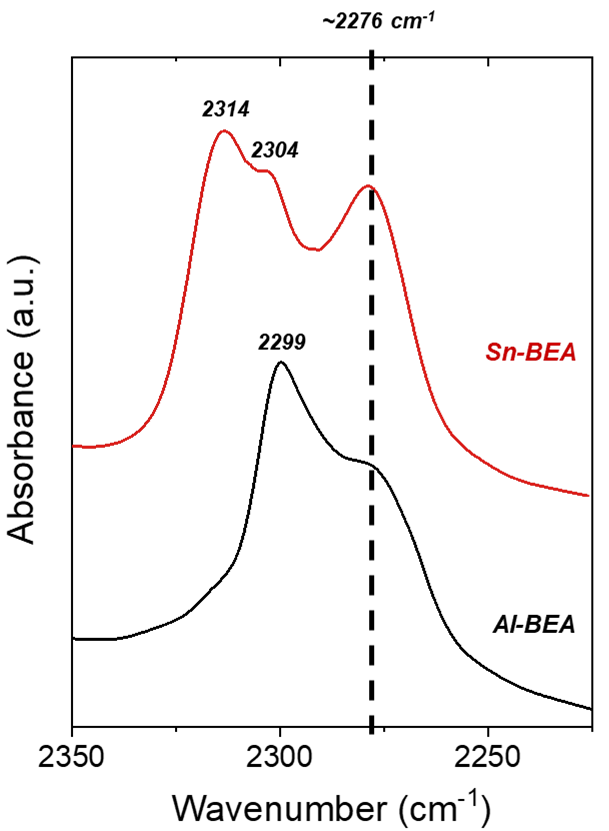


**Figure S7.** Infrared spectra of deuterated acetonitrile (CD3CN) bound to M-BEA (Sn (red), Al (black)) materials (0.05 kPa CD3CN, 101 kPa Ar, 303 K). All spectra are normalized to the area of the Si-O-Si region of the zeolite from 1750-2100 cm-1. Spectra are vertically offset for clarity.

The feature at ~2299 cm-1 for Al-BEA is consistent with previous assignments for CD3CN bound to Brønsted acidic Al sites.29-30 Al-BEA shows a shoulder at ~2276 cm-1 that has been reported to result from CD3CN coordinated to (SiOH)x nests within *BEA.29, 31 Extraframework Lewis acidic Al species have been reported to show a feature at ~2325 cm-1,29-30 where no feature is observed in Al-BEA. The spectra suggests that the Al atoms in Al-BEA predominantly exist as tetrahedrally incorporated Brønsted acid sites.

Sn-BEA also shows a feature at ~2276 cm-1 that likely originates from CD3CN bound to Si-OH groups. Sn-BEA also displays features at ~2304 and ~2314 cm-1, which align with previous proposals for closed and open tetrahedral Sn sites within zeolites, respectively.32-34 While the presence of these two features demonstrates a mix of Sn site structures under an inert gaseous environment, the ratio of open and closed sites may change in the presence of solvent. Several past studies argue that closed Lewis acid sites may open in the presence of protic molecules such as H2O35-37 and alcohols,38-39 meaning that Sn sites can open *in situ* in the presence of CH3OH and convolute the *ex-situ* site distribution.

Collectively, the spectra of adsorbed CD3CN in Figure S7 demonstrate the presence of Lewis and Brønsted acid sites within the M-BEA materials.


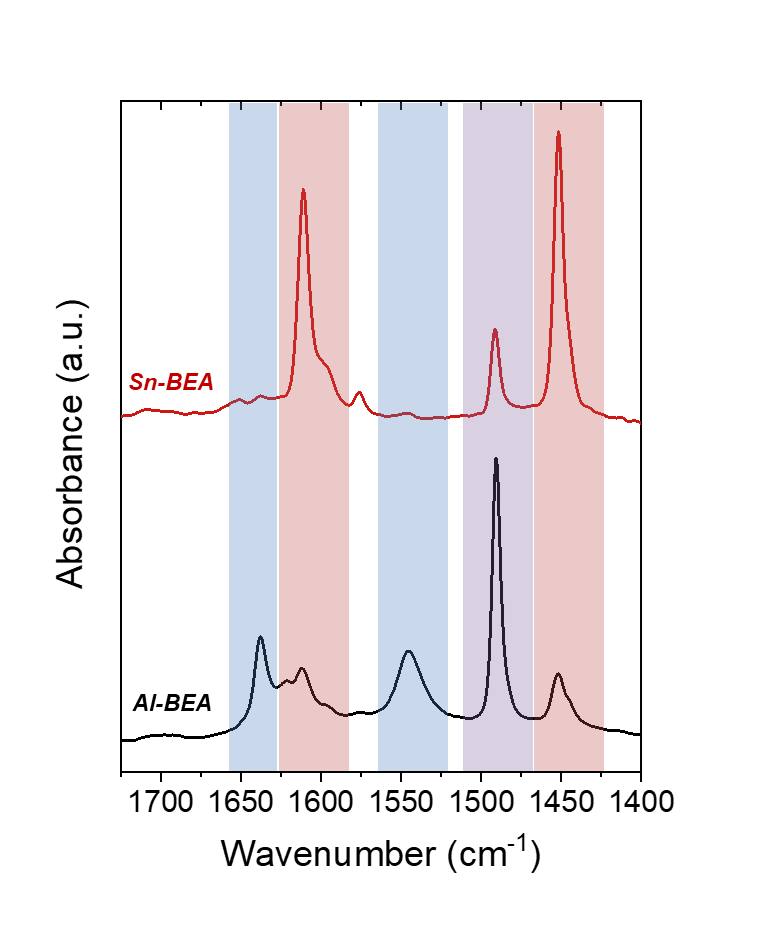


**Figure S8.** Infrared spectra of pyridine (C5H5N) bound to Lewis and Brønsted acid sites over M-BEA (Sn (red), Al (black)) materials (0.9 kPa C5H5N, 101 kPa Ar, 393 K). All spectra are normalized to the area of the Si-O-Si region of the zeolite from 1750-2100 cm-1. The highlighted regions on the plot represent regions for C5H5N absorbance features coordinated to only Brønsted acid sites (blue), only Lewis acid sites (red), and either Lewis or Brønsted acid sites (purple). Spectra are vertically offset for clarity.

Figure S8 reveals that Al-BEA and Sn-BEA both possess features at ~1490 cm-1, corresponding to C5H5N bound to Lewis or Brønsted acid sites.40-41 Each catalyst also possesses features at ~1450 cm-1 and 1580-1625 cm-1, which have been attributed to C5H5N bound to Lewis acid sites.40, 42-47 The presence of these features in Al-BEA may signal the presence of some fraction of extraframework Lewis acidic Al species, in contrast with the absence of Lewis acid Al features on the CD3CN spectra. Al-BEA also shows features at ~1550 and ~1640 cm-1, which solely originate from protonated C5H5N at Brønsted acid sites.40-44 Sn-BEA contains very minor features in these regions, which may suggest that a minor fraction of Sn sites possess Brønsted acid character. Sn-BEA and Al-BEA show small features at ~1575 cm-1, which has been attributed to physisorbed C5H5N.40, 44, 48

Sn-BEA contains a sharp feature at ~1611 cm-1, which has previously been assigned to C5H5N coordinated to Lewis acidic Sn sites.34, 49-50 Sn-BEA also shows a shoulder at ~1595 cm-1, consistent with previous assignments for C5H5N hydrogen-bonded to -OH groups.41, 43-44, 46 These features may arise from C5H5N coordinated to the -OH group from Sn-OH (open sites), the adjacent Si-OH, or (SiOH)*x* nests.

Overall, the spectra of adsorbed C5H5N in Figure S8 provide insight into the distribution of active sites within M-BEA.

**S3. Calculation and Estimation of Epoxide and Product Sensitivity Factors**


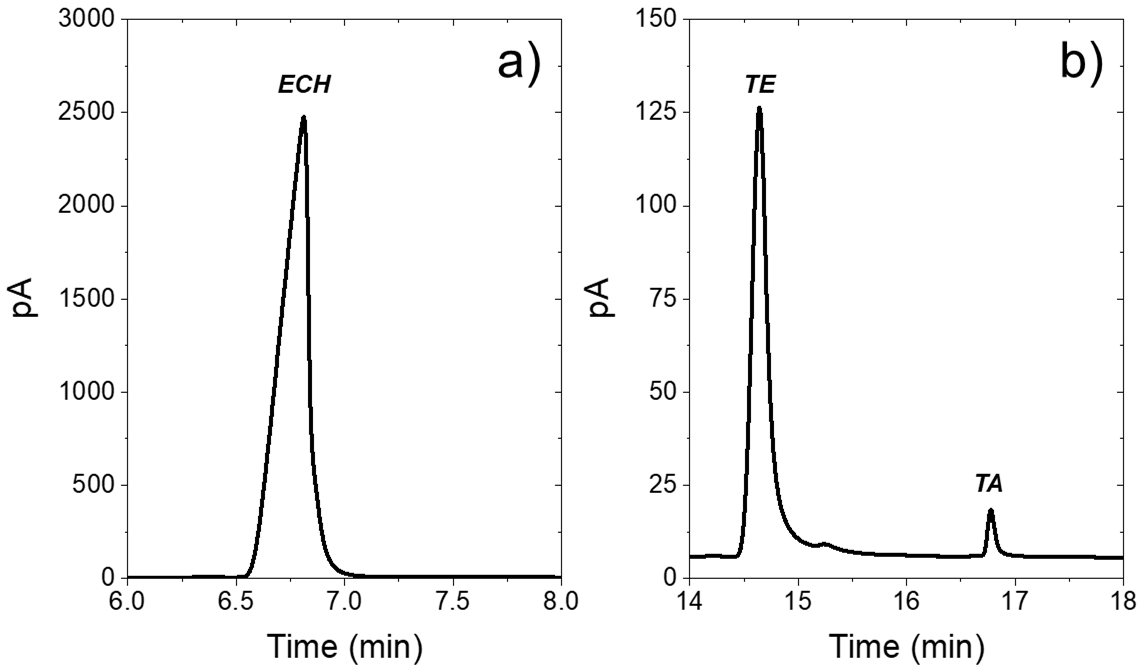


**Figure S9.** Raw GC chromatograms zoomed in to show peaks corresponding to (a) C3H5ClO, and (b) the terminal ether and terminal alcohol formed by the reaction of C3H5ClO with CH3OH over Sn-BEA for 0.5 h (0.2 M C3H5ClO, 24.7 CH3OH, 308 K).

Figure S9 demonstrates the high signal-to-noise ratio of C3H5ClO and the TE and TA product peaks from the GC chromatograms, as well as the peak separation between the ring-opening products. GC chromatograms were collected as a function of concentrations, which were used to determine the sensitivity factors of the epoxide and TE product using as-purchased chemicals (see Section 4.3 of the main text for sources and purities). Table S4 reports the sensitivity factors for these species, which equal the slope of the calibration curve fit lines for the GC peak area as a function of species concentration. A commercial sample for the TA product was not available for purchase, so we assumed that TA and TE have identical sensitivity factors. Our previous work showed that the sensitivity factors for the TA and TE products from C4H8O differ by less than 5%, so we expect the products from C3H5ClO will show very similar values as well.51

| Compound | Sensitivity Factor (peak area M-1) |
| --- | --- |
| C3H5ClO | 85210 |
| TE | 63060 |

**Table S4**. Sensitivity factors determined from calibration curves.

During reactions, the concentration of the products was calculated with the integrated peak areas and measured sensitivity factors:

(S2)


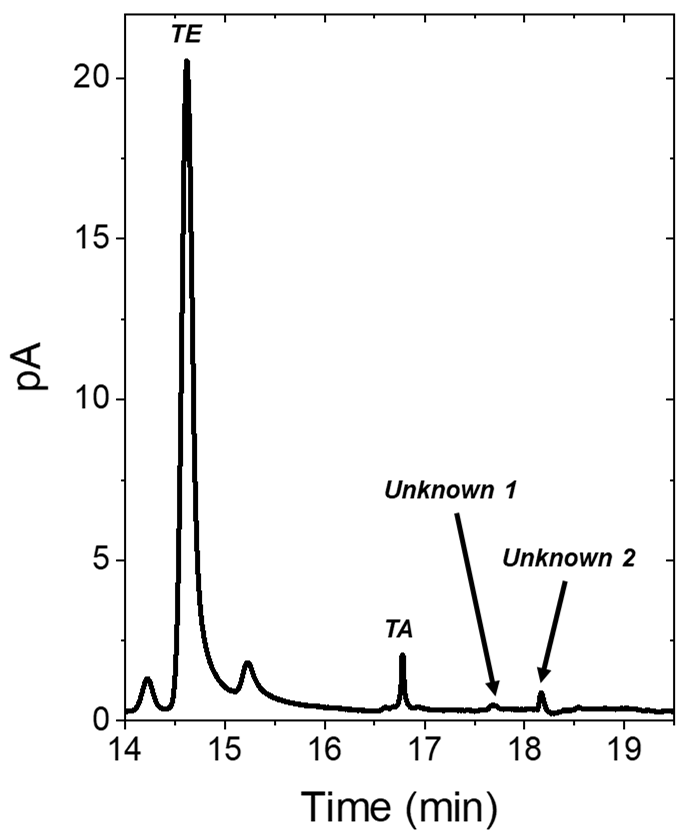


**Figure S10.** Raw GC chromatograms zoomed in to show peaks corresponding to the terminal ether product, terminal alcohol product, and unknown peaks that appear during the reaction of C3H5ClO with CH3OH over Sn-BEA for 0.5 h (0.2 M C3H5ClO, 1 M CH3OH, 308 K).

Figure S10 shows a GC chromatogram from the reaction of C3H5ClO with CH3OH, where unknown peaks appear at 17.7 and 18.2 minutes. The unknown peaks account for < 5% of all products formed. While the unknown species have not been identified, the peaks may originate from secondary oligomers formed by the reaction of the ring-opening products reacting with epichlorohydrin.

**S4. Madon-Boudart Criterion Test to Identify Active Centers for Ring-Opening**


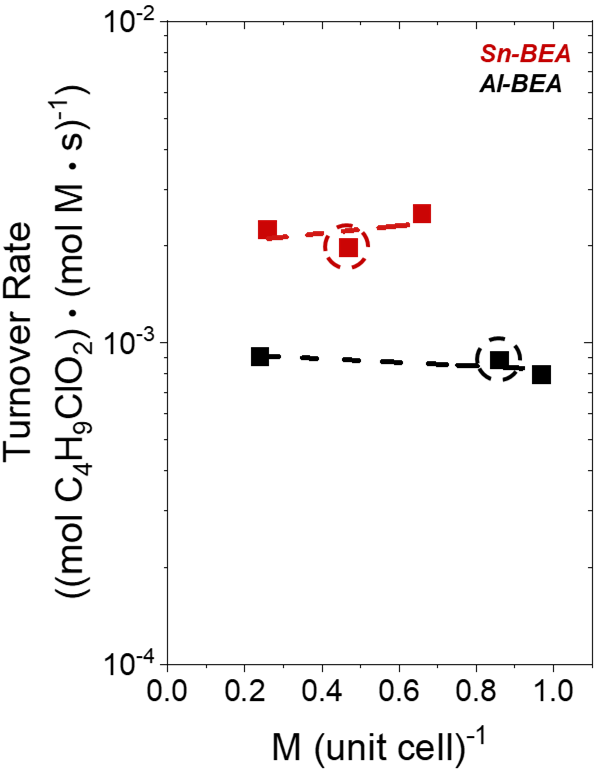


**Figure S11.** Total product formation rates from C3H5ClO ring-opening with CH3OH (0.07 M C3H5ClO, 0.4 M CH3OH, CH3CN solvent, 308 K) as a function of active metal loading over Al- (black) and Sn-BEA (red). The circled points signify the catalyst used for this study.

Figure S11 presents turnover rates as a function of metal loading for each M-BEA. Rates depend negligibly on metal loading within the range of loadings examined for all materials, ruling out contributions from intrapore mass transfer to turnover rate measurements.

**S5. XRD Analysis of Spent Catalyst and Hot Filtrations to Examine Catalyst Stability**


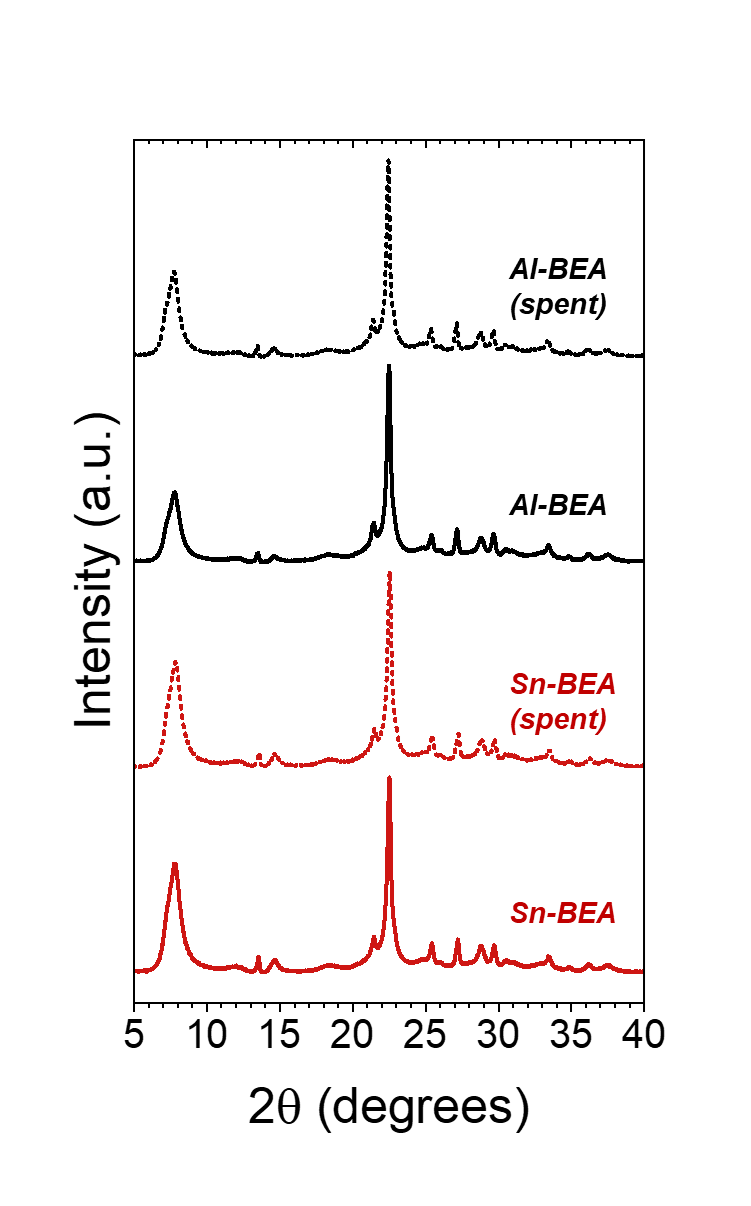


**Figure S12.** Powder X-ray diffractograms obtained before (solid lines) and after (hollow lines) the C3H5ClO ring-opening reaction with CH3OH (0.07 M C3H5ClO, 1 M CH3OH, CH3CN solvent, 308 K) over Al- (black) and Sn-BEA (red). The reaction was carried out for 24 hours, then the catalyst was recovered and dried by vacuum filtration. Spectra were collected with Cu Kα radiation (0.15418 nm) under ambient conditions, and are vertically offset for clarity.

Figure S12 presents X-ray diffraction patterns for M-BEA before and after the reaction of C3H5ClO with CH3OH over 24 hours. The fresh and spent Al-BEA and Sn-BEA materials show nearly identical peak locations and intensities, supporting that contacting these catalysts with the reaction mixture does not cause structural changes or catalyst deactivation.


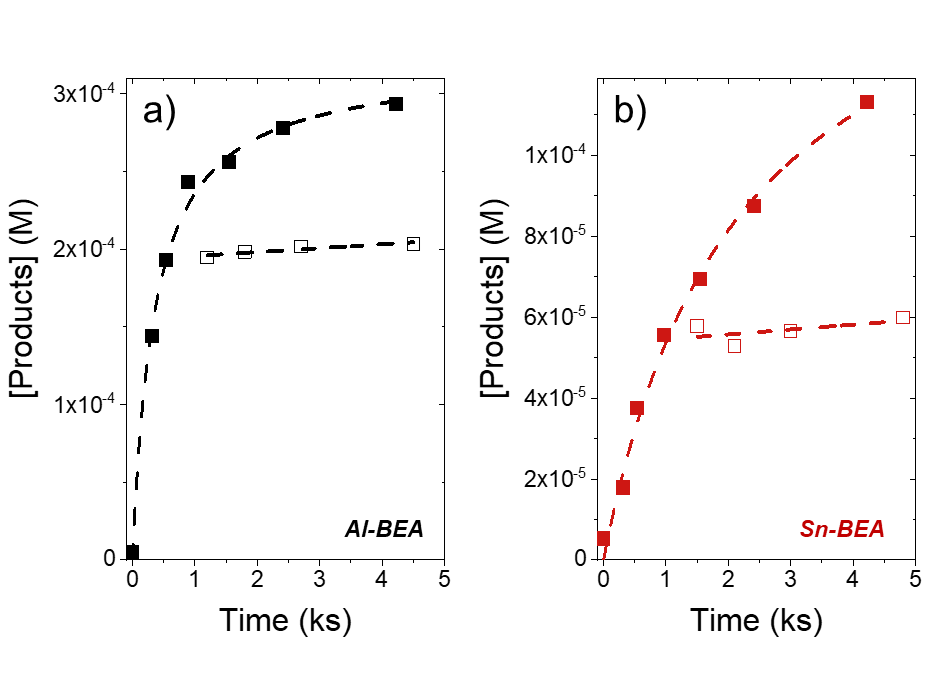


**Figure S13.** Measured total product concentrations (sum of [1M2B] and [2M1B]) as functions of time during hot filtration tests for 1,2-epoxybutane (C4H8O) ring-opening (0.005 M C4H8O, 6 M CH3OH, CH3CN solvent, 308 K) over (a) Al-BEA (black) and (b) Sn-BEA (red). The hollow points represent epoxide concentrations from aliquots that were separated from the catalyst after ~10-15 min, while solid points indicate concentrations from aliquots that were kept in contact with the catalyst throughout the reaction.

Figure S13 displays the results of hot filtration tests for Al-BEA and Sn-BEA during the ring-opening of 1,2-epoxybutane (C4H8O) with CH3OH, taken from our previous work.51 After separating the solution from the catalyst, the concentration of the ring-opening products stops increasing with time (hollow points). This result provides evidence that metal atoms do not leach from the *BEA framework, and the active sites remain within the framework during catalysis. While these experiments utilize C4H8O instead of C3H5ClO, we argue that the experiments support that the active sites in Al-BEA and Sn-BEA will also remain coordinated to the zeolite framework during C3H5ClO ring-opening with CH3OH.

**S6. Counting Active Sites with 1,2-Diphenyl-1,2-Ethylenediamine Titrations**

**
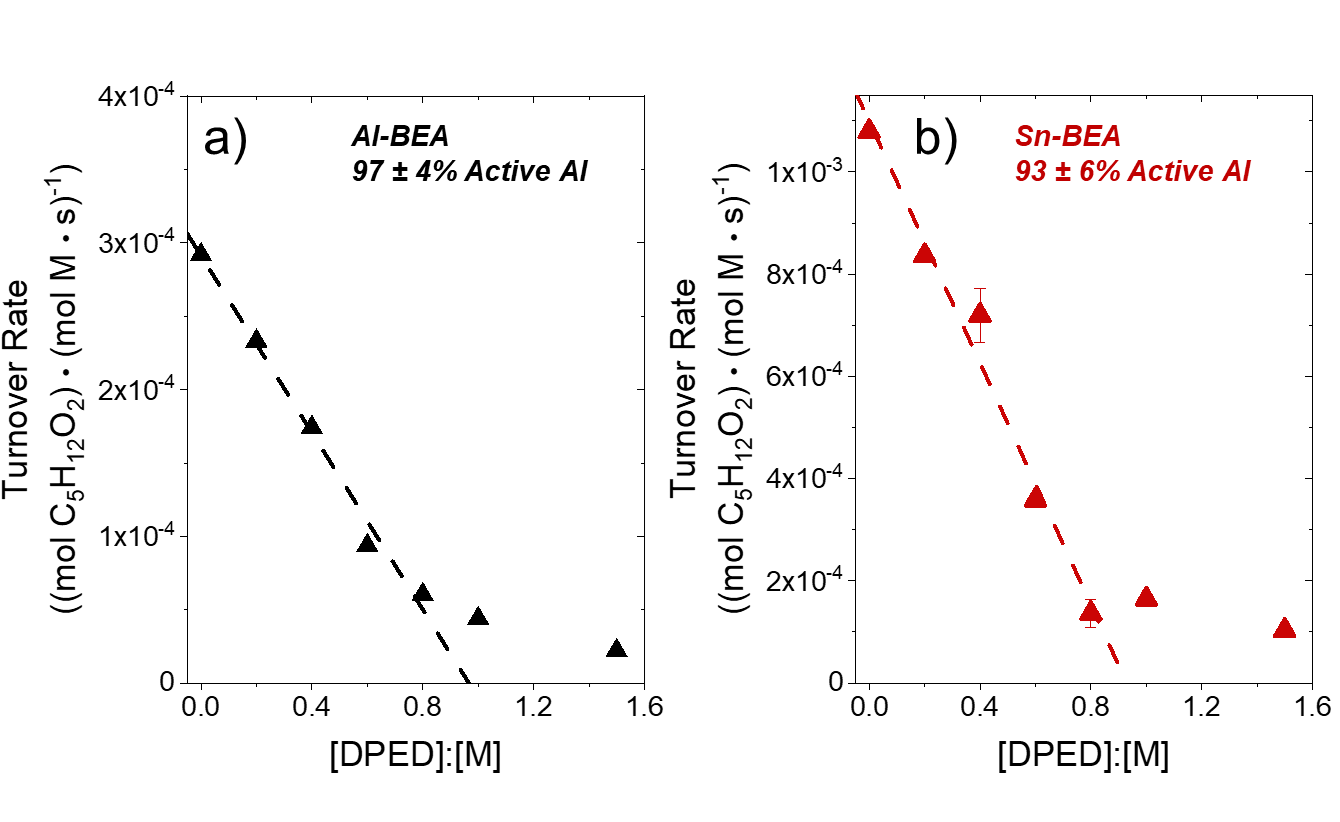
**

**Figure S14.** Total product formation rates from C4H8O ring-opening with CH3OH (0.005 M C4H8O, 0.4 M CH3OH, CH3CN solvent, 308 K) as a function of 1,2-diphenyl-1,2-ethylenediamine (DPED) to active metal ratio over (a) Al-BEA (black) and (b) Sn-BEA (red). The data for Al-BEA was reported in a previous manuscript.52

1,2-diphenyl-1,2-ethylenediamine (DPED) is a titrant that could poison active sites in both Lewis and Brønsted acidic M-BEA, which was utilized to count active sites during C4H8O ring-opening. A line was fit to the linear portion of the plots in Figure S14 and extrapolated to the x-axis to estimate the number of active sites present in the M-BEA materials. All materials show greater than 90% active metal atoms, providing evidence that all (or nearly all) metal atoms are tetrahedrally bound to the *BEA framework and catalyze ring-opening. We anticipate that the M-BEA materials would show a similarly high quantity of active metal atoms during C3H5ClO ring-opening.

**S7. Derivation of Rate Expression for C3H5ClO Ring-Opening with CH3OH over M-BEA**

| Catalyst | [CH3OH]:[C3H5ClO] < 15 | | [CH3OH]:[C3H5ClO] > 30 | |
| --- | --- | --- | --- | --- |
| TE | TA | TE | TA |
| Al-BEA | [CH3OH]**1.05**  [C3H5ClO]0.14 | [CH3OH]**0.58**  [C3H5ClO]0.19 | [CH3OH]**0.29**  [C3H5ClO]0.77 | [CH3OH]**0.24**  [C3H5ClO]0.83 |
| Sn-BEA | [CH3OH]**0.99**  [C3H5ClO]0.16 | [CH3OH]**0.45**  [C3H5ClO]0.22 | [CH3OH]**0.19**  [C3H5ClO]0.83 | [CH3OH]**0.10**  [C3H5ClO]0.80 |

**Table S5.** Formation Rate Orders of TE and TA for C3H5ClO ring-opening from Figure 1 in main text.

The formation rates of TE and TA derived from C3H5ClO show clear differences in their dependence on the concentration of the nucleophile (i.e., [CH3OH]), which contrasts with prior studies of epoxide ring-opening on solid catalysts. The apparent power-law dependencies for TE and TA formation differ significantly (by 0.5 – 0.6) at [CH3OH]:[C3H5ClO] < 15.

**S7. Derivation of Rate Expression for C3H5ClO Ring-Opening with CH3OH over M-BEA**


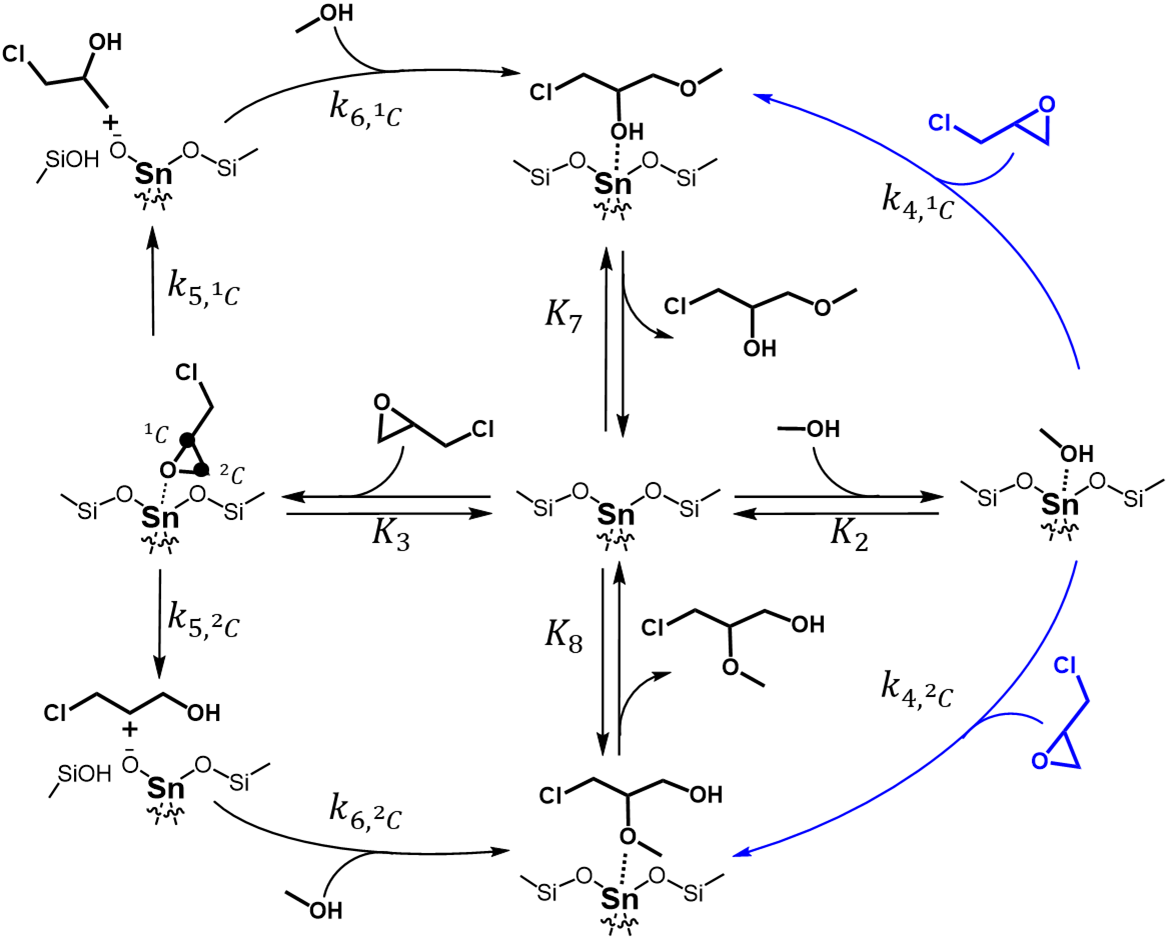


**Scheme S2**. Plausible product-forming steps for ring-opening of C3H5ClO with CH3OH over Sn-BEA. Reaction may proceed through a concerted SN2 pathway with an activated CH3OH intermediate (blue) or a stepwise SN1 pathway in which C3H5ClO ring-opens to form carbocations, followed by adsorption and activation of CH3OH (black). For brevity, we do not show the reversible adsorption of CH3CN molecules (step 1) in this cycle.

Scheme S2 and Scheme 1 in the main text depict the proposed steps for the ring-opening of C3H5ClO with CH3OH over Sn-BEA and Al-BEA, respectively. The catalytic cycle begins with the adsorption of CH3CN (step 1, not shown), C3H5ClO (step 2), or CH3OH (step 3). The products may form through adsorbed CH3OH in a kinetically relevant SN2 reaction step (4). Alternatively, an SN1 pathway may occur, where adsorbed C3H5ClO irreversibly ring-opens to form a primary or secondary carbocation (step 5). The products then form when CH3OH attacks the adsorbed carbocations (step 6). The products desorb in reversible steps (7 and 8) to complete the cycle. The total rates of product formation from C3H5ClO ring-opening rates can be modeled with:

(S3)

where and represent the numbers of primary and secondary ring-opened carbocations formed from steps with the rate constants and , respectively. The term represents the sum of the rate constants to form the products in step 4 (). We apply the pseudo-state hypothesis to the respective bound intermediates, which gives:

(S4)

The term expands to two terms to account for the formation of the terminal ether and terminal alcohol products. The total number of active sites in each M-BEA ([L]) can be written as:

(S5)

Where represents the number of unoccupied active sites and the other terms represent the number of adsorbed solvent, reactant, and product molecules. Substituting in terms for the solvent, product, and reactant concentrations, rate constants, and equilibrium constants yields:

(S6)

(S7)

The total rate of product formation depends linearly on [CH3OH] and weakly on [C3H5ClO] at ratios of [CH3OH] to [C3H5ClO] less than 15 over each M-BEA, implicating active sites saturated with a C3H5ClO-derived species. In this case, we assume that the [C3H5ClO*], [C1+*], and [C2+*] terms dominate in the denominator of Equation S7, allowing other terms to be canceled out:

(S8)

The second and third terms in the numerator dominate when ratios of [CH3OH] to [C3H5ClO] are sufficiently low and the value of far exceeds (i.e., when adsorption and reaction of C3H5ClO overtakes the reaction through protonated CH3OH). Independent measurements of the adsorption enthalpies of these reactants obtained by ITC support this assumption: adsorption enthalpies for C3H5ClO to M-BEA (-120 to -150 kJ mol-1) are significantly more exothermic than those for CH3OH (~ 0 kJ mol-1) in CH3CN (Section S10). These thermodynamic measurements suggest that C3H5ClO adsorbs more readily than CH3OH (i.e., >> ). These insights collapse Equation S8 to the following form after combining and pulling out common terms:

(S9)

From there, the expression can be simplified to a rate equation that agrees with experimental observations (Figure 1) and describes rates for SN1 pathways that proceed through protonated C3H5ClO as:

(S10)

Notably, the form of Equation S10 implies that the number of ring-opened carbocation species derived from C3H5ClO exceeds the number of C3H5ClO* that retain the oxirane ring, which agrees with *in situ* NMR spectra (*vide infra*). Table S5 shows that TE formation rates increase linearly and TA formation rates increase sub-linearly with [CH3OH], which implies that the rate constant to form a ring-opened primary carbocation intermediate (e.g., ) exceeds that to remove that intermediate from the active site (i.e., ). In contrast, and possess similar magnitudes to provide a sublinear dependence on [CH3OH] for TA formation.

When CH3OH-derived species saturate active sites, Equation S7 simplifies to:

(S11)

Equation S11 reproduces the observations for rates and describes SN2 pathways () when the first term in the numerator dominates, which occurs when catalysis proceeds at sufficiently high ratios of [CH3OH] to [C3H5ClO] (>30). These conditions simplify Equation S11 to the form:

(S12)

which predicts both TA and TE products form at rates proportional to [C3H5ClO] and independent of [CH3OH]. The form of Equation S12 deviates slightly from the measured dependence of rate on [C3H5ClO] and [CH3OH] (Figure 1 and Table S5). These differences indicate that the number of CH3OH* species do not achieve much greater values than C3H5ClO*-derived intermediates even at the greatest concentration ratios examined, which agrees with expectations based on the more exothermic adsorption of C3H5ClO relative to CH3OH (*vide supra*).

TE and TA formation show very similar rate orders with respect to [CH3OH] at [CH3OH]:[C3H5ClO] >30. As such, the significant preference towards the TE product at the highest [CH3OH] in Figure 7 (*β* > 18) must occur because >> . The SN2 pathway therefore dominantly forms the TE product due to differences in the rate constants for product formation.

Equations S10 and S12 describe the two kinetic regimes observed for TA and TE formation in Figure 1 of the main text.

Equation S3 can be utilized to define the regioselectivity through the rate ratio of terminal ether to terminal alcohol formation (*β*):

(S13)

As described in Section 3.4 of the main text, the NMR spectra suggest that shows the lowest value of all rate constants in Equation S13, allowing the expression to simplify to:

(S14)

Substituting in terms for , , and then simplifying the expression yields:

(S15)

Finally, combining terms yields a simplified expression for *β*:

(S16)

Equation S16 predicts a linear dependence of *β* on and a negative, sublinear dependence on . As discussed in Section 2.4, this equation captures the linear dependence of *β* on shown in Figure 7a of the main text. The weak dependence of on (Figure 7b) suggests that CH3OH desorption proceeds much more rapidly than the SN2 reaction step that forms the ring-opened products with adsorbed CH3OH (i.e., >> ). Under this assumption, Equation S16 simplifies to a form that clearly demonstrates the linear dependence of *β* on and negligible dependence on shown in Figure 7 of the main text:

(S17)

**S8. Excess Energies to Probe Liquid-Phase C3H5ClO and CH3OH Stability**

|  | **C3H5ClO** | | | **CH3OH** | | |
| --- | --- | --- | --- | --- | --- | --- |
| Solvent | γ | (kJ mol-1) | (kJ mol-1) | γ | (kJ mol-1) | (kJ mol-1) |
| CH3CN | 0.82 | -0.54 | -0.53 | 2.64 | 2.39 | 2.53 |
| 6 M CH3OH (in CH3CN) | 0.83 | -0.93 | -0.50 | 1.77 | 2.43 | 1.48 |
| 12 M CH3OH (in CH3CN) | 0.92 | -0.81 | -0.21 | 1.29 | 0.9 | 0.66 |
| CH3OH | 1.63 | -0.73 | 1.27 | 1 | 0 | 0 |

**Table S6**. Activity coefficients (γ), excess enthalpies (), and excess free energies () calculated at 308 K in mixtures of CH3CN and CH3OH. Activity coefficients were obtained with the UNIFAC method on ChemCAD.

Table S6 presents excess energies and activity coefficients for C3H5ClO and CH3OH in mixtures of CH3OH and CH3CN. The equations used to compute the excess energies from the activity coefficients are:

(S18)

(S19)

where *j* represents C3H5ClO or CH3OH, R is the ideal gas constant, and T equals temperature. The differential term was obtained from activity coefficients between 303-323 K. The natural log of the activity coefficients was plotted against the temperature, and the slope of this line equaled the differential term.

γ values vary by factors of less than 2 and 3 for C3H5ClO and CH3OH, respectively, across the range of solvent compositions examined for ring-opening. Furthermore, both and values span a range of less than 3 kJ mol-1. The weak dependences of these values on the fractions of CH3OH and CH3CN support that the stability of reactive species and adsorbates in the liquid phase does not drive changes in ring-opening rates, activation enthalpies for ring-opening, and enthalpies of adsorption for C3H5ClO.

**S9. Activation Enthalpy and Entropy Measurements**


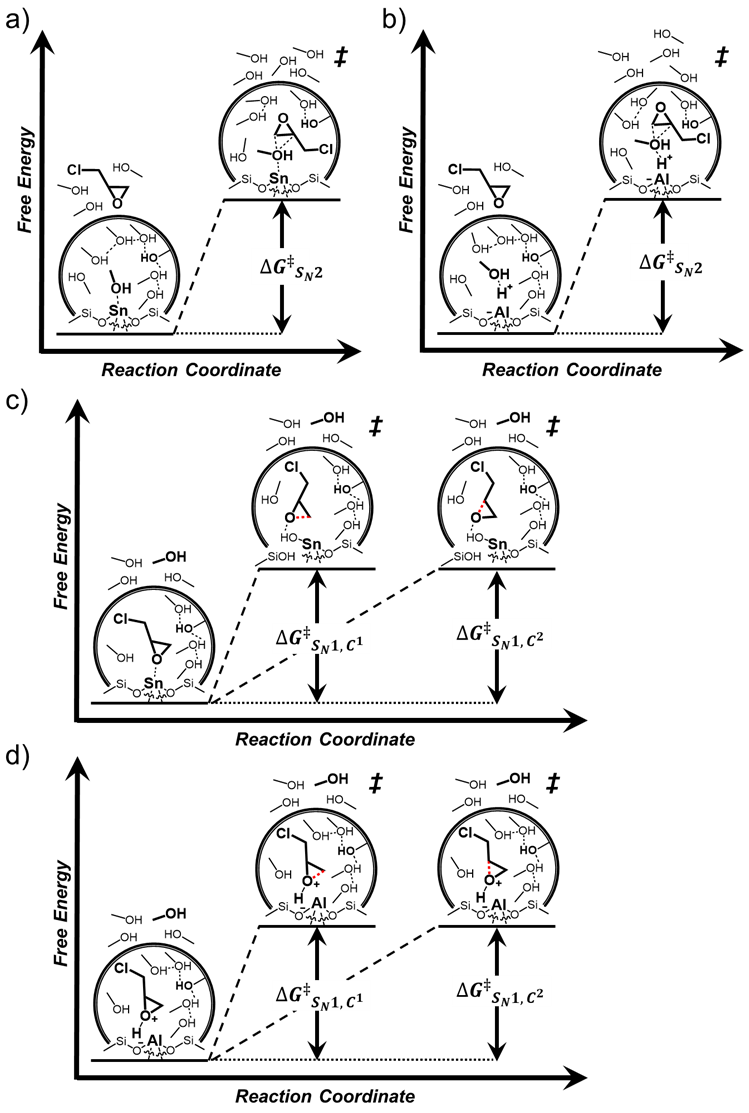


**Scheme S3.** Proposed reaction coordinate diagram for C3H5ClO ring-opening with CH3OH through an a) SN2 pathway over Sn-BEA, b) SN2 pathway over Al-BEA, c) SN1 pathway over Sn-BEA, d) SN1 pathway over Al-BEA. *Note*: we acknowledge that the reaction of CH3OH and the carbocations in c) and d) may also carry kinetic relevance.

Figure S15 presents activation barrier measurements for the formation of the terminal ether (TE) and terminal alcohol (TA) products from C3H5ClO ring-opening with CH3OH. The formation of TA shows more positive (by > 17 kJ mol-1) and (by > 40 J mol-1 K-1) values than TE at 0.07 M CH3OH. The significant differences for and suggests that distinct reaction pathways may govern product formation in this regime. SN1 pathways feature unimolecular transition states, which should lead to more positive values than SN2 pathways that react through bimolecular transition states (see Scheme S3 for proposed reaction pathways).53 An SN1 reaction pathway may dominate for TA formation at low [CH3OH] values while TE may form from a combination of SN1 and SN2 reactions. Interestingly, the difference between and for the product is less significant over Al-BEA than Sn-BEA in this low [CH3OH] regime, which may suggest that TE formation shows more SN1 character to provide more positive and .


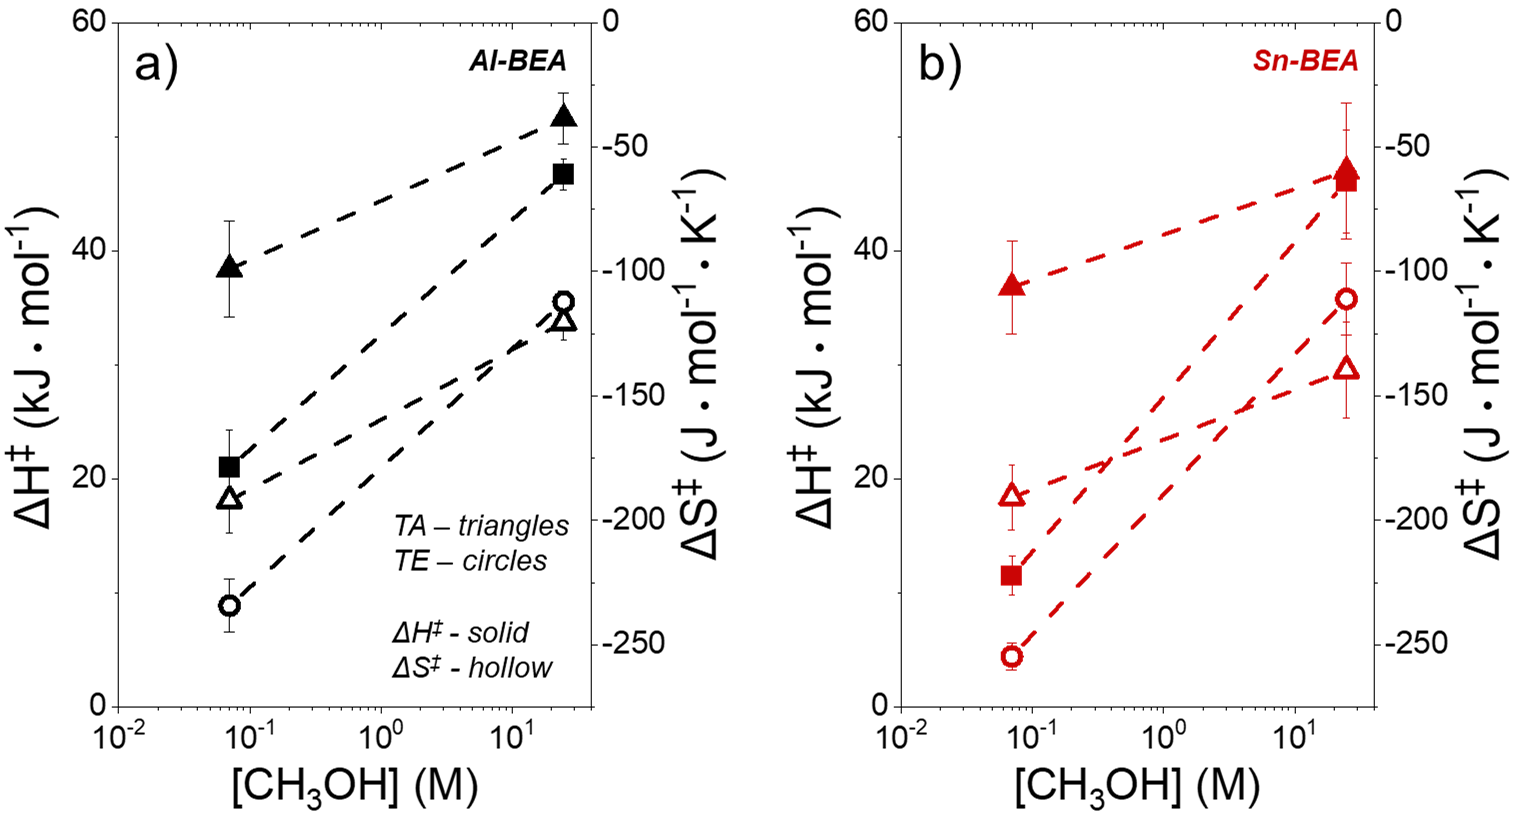
 **Figure S15**. Activation enthalpy and entropy to form the terminal ether (circles) and terminal alcohol (triangles) products from C3H5ClO ring-opening (0.07 M C3H5ClO, 308 K) over a) Al-BEA (black) and b) Sn-BEA (red).

In the absence of CH3CN co-solvent (24.7 M CH3OH), the products shift to very similar values (< 5 kJ mol-1). This similarity may suggest that both products shift towards similar dominant reaction pathways, which we expect would be an SN2 pathway through CH3OH-derived adsorbed species. Here, more positive values may drive the dominant formation of TE through lesser steric hindrance during the SN2 pathway.

While we argue that the differences in activation parameters between the products provide evidence for the shift in reaction pathways with [CH3OH] evidenced by the NMR spectra discussed in Section 2.3, we cannot rule out that solvation effects may also play a role. We have previously argued that the disruption of hydrogen-bonded CH3OH molecules drives increases in and with [CH3OH] for C4H8O ring-opening over M-BEA materials. Interactions with surrounding solvent molecules may also play a role in C3H5ClO ring-opening and may affect the TE and TA formation transition states differently.

**S10. Isothermal Titration Calorimetry Thermograms and Heats of Adsorption**


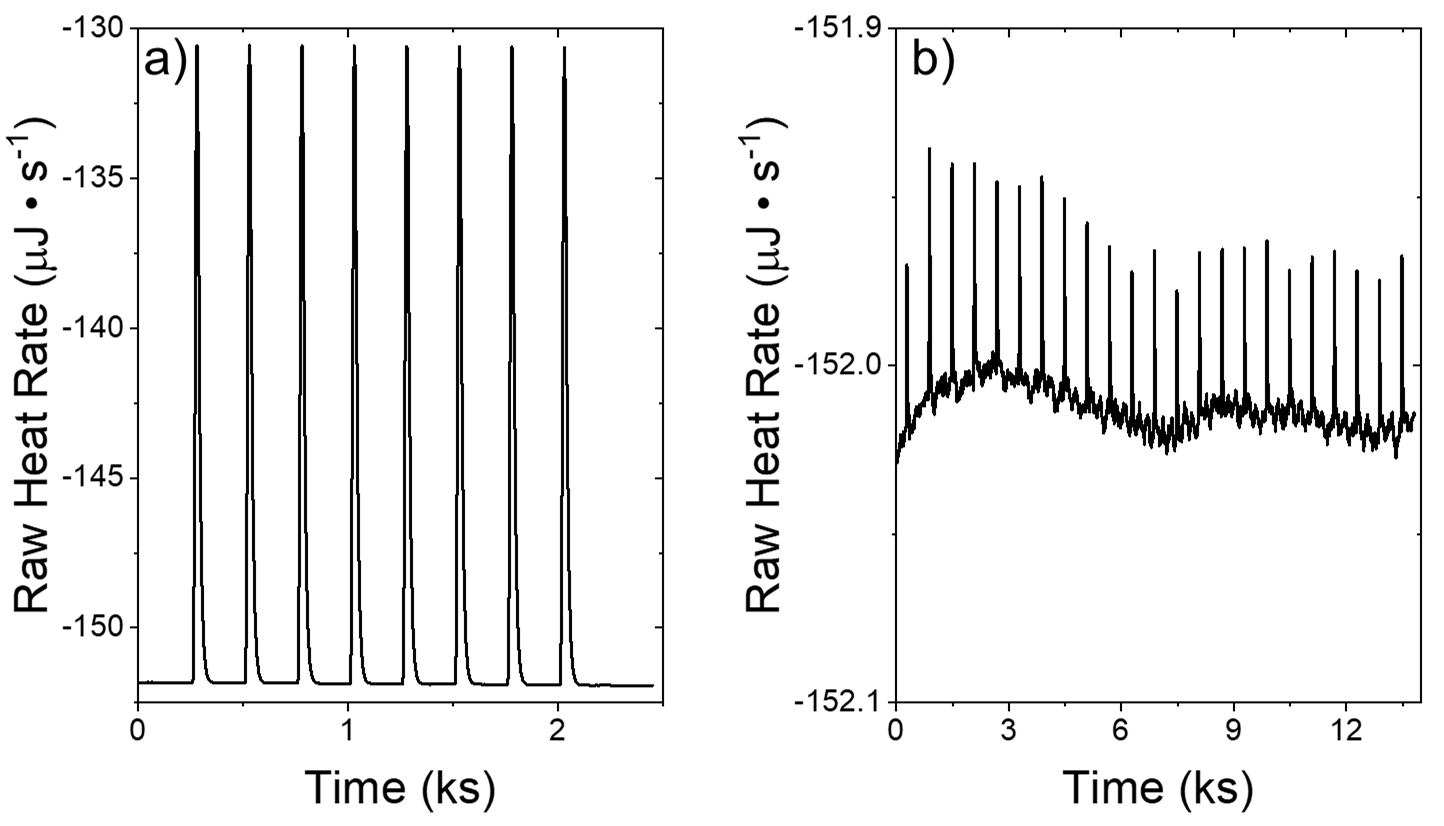


**Figure S16.** a) ITC thermogram from the electrical calibration of the NanoITC. b) ITC thermogram from the water-water adsorption to check the cleanliness of the ITC cell.

The plots in Figure S16 were obtained during the calibration and cleaning procedures for isothermal titration calorimetry (ITC), as discussed in Section 4.4 of the main text. Figure S16a shows the heat released from the sequential pulses during the electrical calibration. The instrument gave a calibration factor, for which values greater than 0.98 were assumed to be satisfactory. Figure S16b shows the heat released during the water-water injection, during which each 1 μL injection led to a peak with an area between -3 and +3 μJ.

Figure S17 shows an acid-base titration of NaHCO3 into HNO3, which was used as a standard to verify the results obtained from the NanoITC. The adsorption enthalpy calculated from Figure S17b was -8.1 ± 1.2 kJ mol-1, which agrees well with the reported enthalpy of -9.1 kJ mol-1.54-55


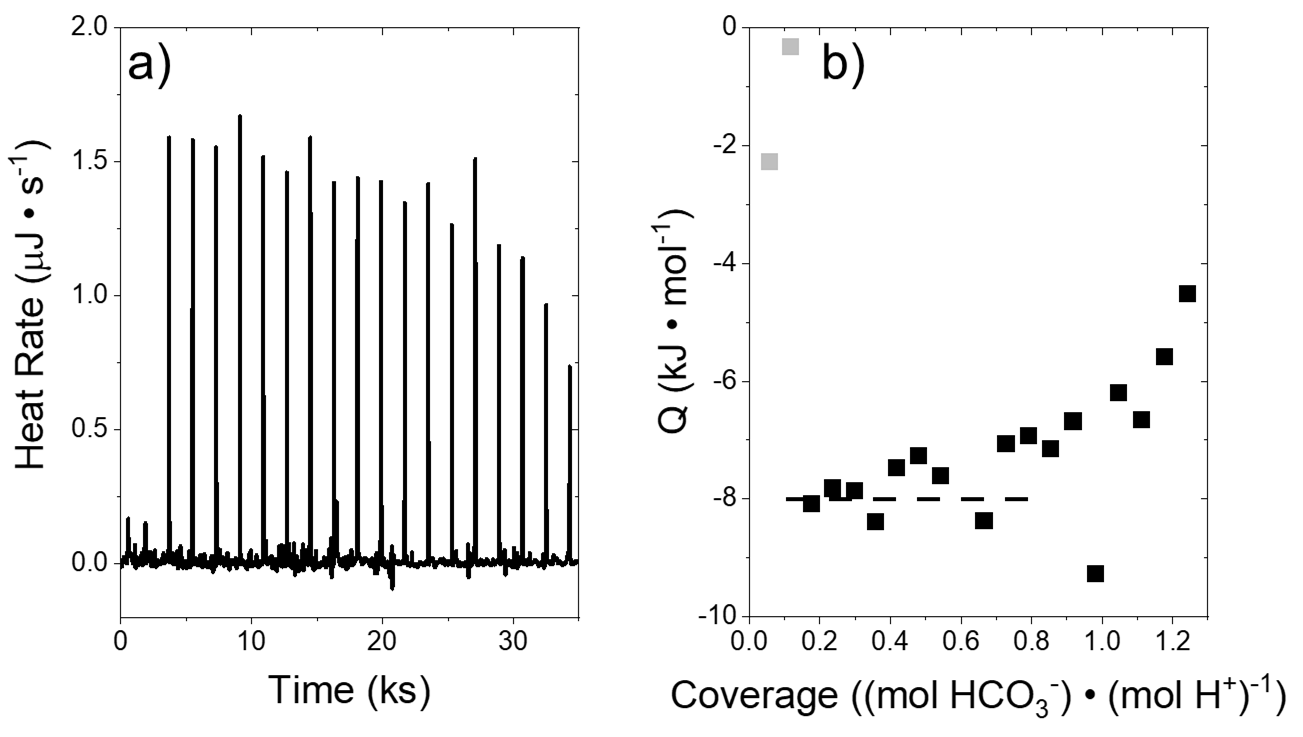


**Figure S17.** a) ITC thermogram from the acid-base titration of HNO3 (0.0005 M in 0.1 M NaCl) with NaHCO3 (0.0052 M in 0.1 M NaCl), b) the corresponding heats released as a function of bicarbonate ion coverage.

The ITC thermogram and heat release plots for all ITC experiments used to calculate the adsorption enthalpies of C3H5ClO and CH3OH into M-BEA are shown below. The CH3OH adsorption experiments were performed at higher titrant concentrations (and thus higher coverages) because CH3OH adsorbs weakly and higher concentrations are needed to observe sufficiently large peaks in the thermogram. Early injections often show lower heat released than expected due to the evaporation of liquid from the syringe needle. Although less common, some of the experiments below show outlier points at later injections, which may result from an inconsistent volume or epoxide concentration in those injections.


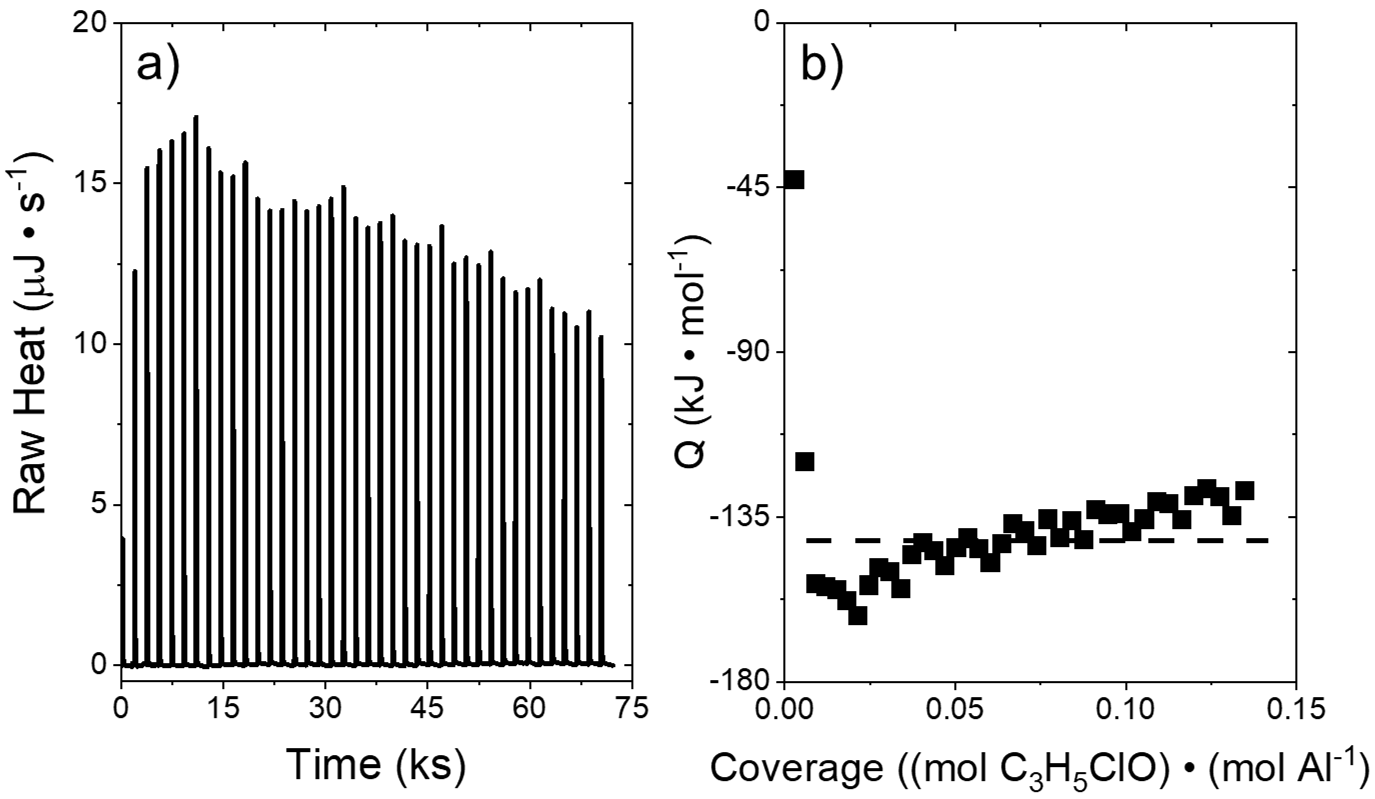


**Figure S18.** a) ITC thermogram from the titration of Al-BEA with C3H5ClO (0.005 M C3H5ClO in CH3CN, 308 K, 1 μL per injection), b) the corresponding heats released as a function of titrant injected.


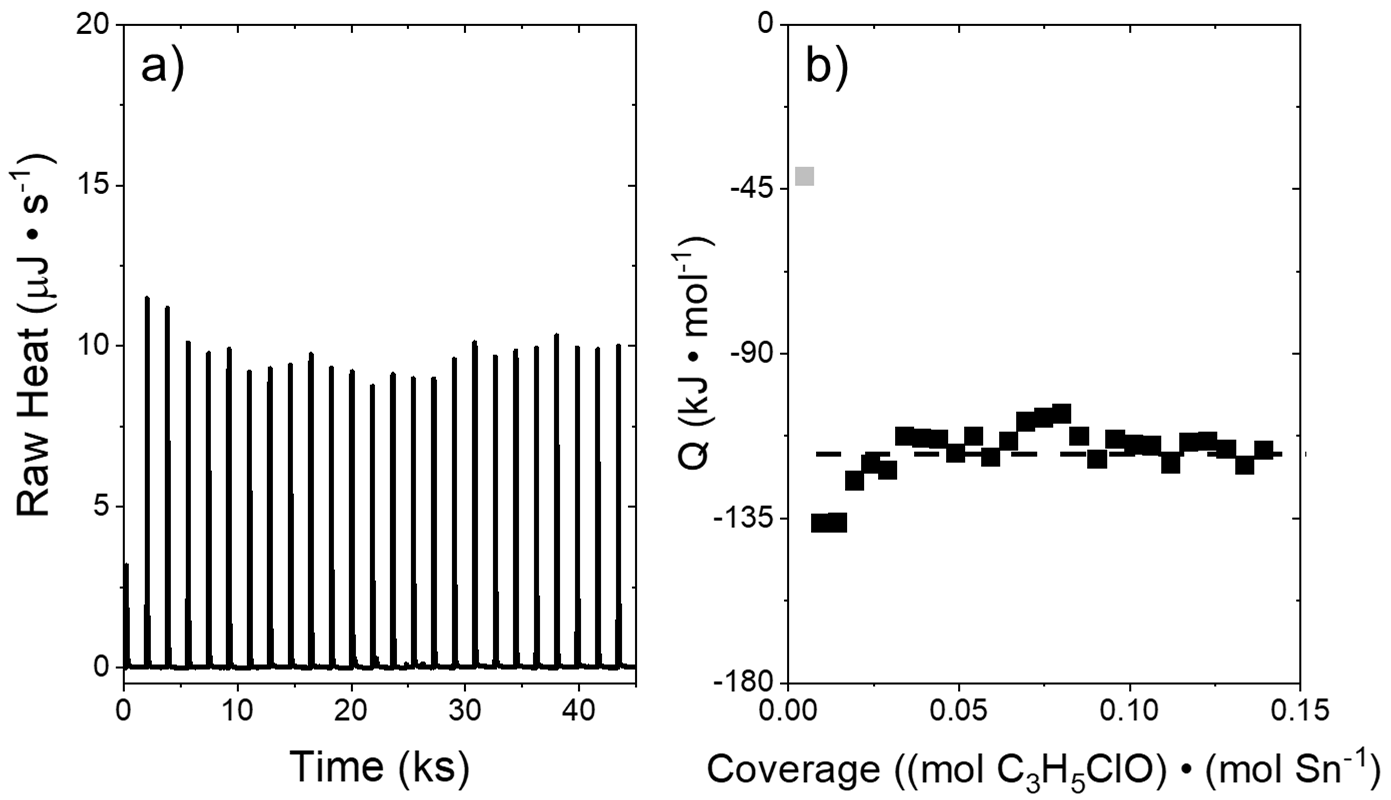


**Figure S19.** a) ITC thermogram from the titration of Sn-BEA with C3H5ClO (0.005 M C3H5ClO in CH3CN, 308 K, 1 μL per injection), b) the corresponding heats released as a function of titrant injected.


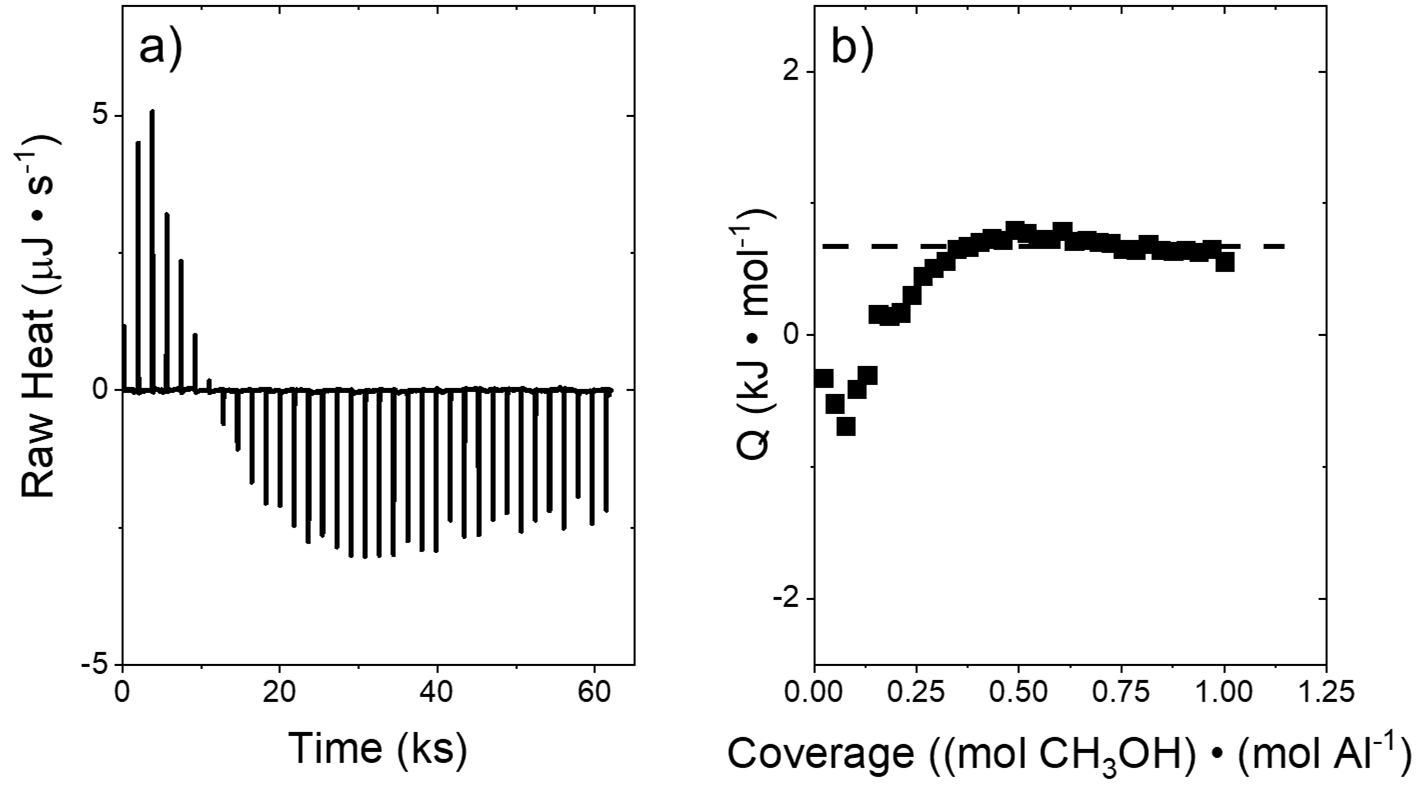


**Figure S20.** a) ITC thermogram from the titration of Al-BEA with CH3OH (0.1 M CH3OH in CH3CN, 308 K, 1 μL per injection), b) the corresponding heats released as a function of titrant injected.


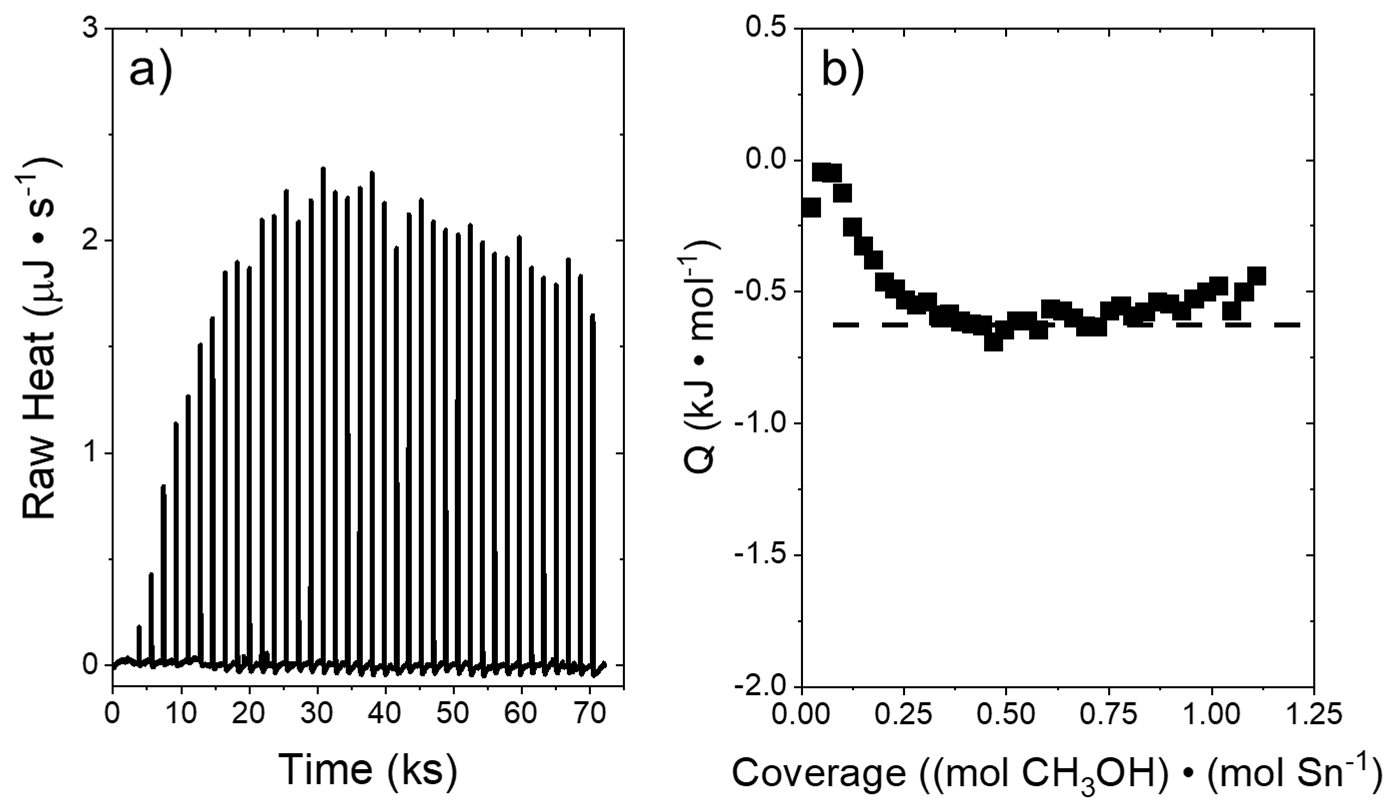


**Figure S21.** a) ITC thermogram from the titration of Sn-BEA with CH3OH (0.1 M CH3OH in CH3CN, 308 K, 1 μL per injection), b) the corresponding heats released as a function of titrant injected.

| Catalyst | (kJ mol-1) | (kJ mol-1) |
| --- | --- | --- |
| Al-BEA | 1.0 ± 0.4 | -141.7 ± 8.9 |
| Sn-BEA | -0.6 ± 0.2 | -116.9 ± 7.0 |

**Table S7**. Adsorption enthalpies for CH3OH and C3H5ClO calculated from ITC thermograms in Figures S18 to S21.

The adsorption enthalpies in Table S7 were calculated by fitting a line through the injections where the heat released was approximately constant. C3H5ClO shows significantly more exothermic adsorption enthalpies than CH3OH over both Al-BEA and Sn-BEA, which may explain why adsorbed C3H5ClO dominates on active sites even in excess of CH3OH ([CH3OH]:[C3H5ClO] < 15, see Figure 1).

CH3OH shows more exothermic adsorption to Sn-BEA than Al-BEA. This suggests that Sn sites activate CH3OH more strongly than the Brønsted acid sites in Al-BEA, which may contribute to the greater reaction rates observed over Sn-BEA.

In contrast, C3H5ClO adsorbs more exothermically to Al-BEA than Sn-BEA. Figure S23 (*vide infra*) suggests that Al-BEA forms ring-opened carbocations from C3H5ClO more readily than Sn-BEA. The formation of these carbocations likely contributes to the more exothermic adsorption of C3H5ClO over Al-BEA.

**S11. Supplemental 13C NMR Plots and Analysis**

**S11.1. 13C NMR Shifts and Discussion of Peak Convolution**

| **Molecule** | **ChemDraw-Predicted 13C Shifts (ppm)** | **DFT-Predicted 13C Shifts (ppm)** | **Experimental 13C Shifts (ppm)** |
| --- | --- | --- | --- |
| 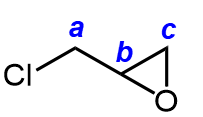 Epichlorohydrin | a = 45.4  b = 51.4  c = 46.9 | COSMO (in Methanol)  a = 51.77  b = 51.85  c = 47.56 | 1 M 13C ECH in Acetonitrile  a = 47.67  b = 52.44  c = 47.67 |
| 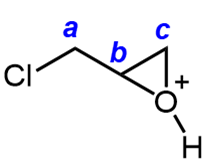  Protonated Epichlorohydrin | N/A  (unable to predict) | COSMO (in Methanol)  a = 43.0  b = 82.9  c = 74.6 | N/A |
| 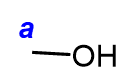    Methanol | a = 49.7 | COSMO (in Methanol)  a = 49.6 | 1 M 13CH3OH in Acetonitrile  a = 49.6 |
| 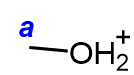  Protonated Methanol | a = 72.1 | COSMO (in Methanol)  a = 68.3 | N/A |
| 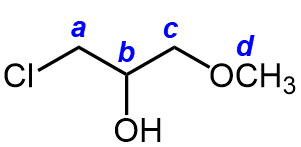Terminal ether | a = 46.2  b = 70.6 ± 3.7  c = 76.2 ± 2.5  d = 59.0 ± 1.7 | COSMO (in Methanol)  a = 54.5  b = 77.9  c = 75.9  d = 55.8 | 3.1 M C4H9ClO2 in CD3CN  a = 46.5  b = 69.8  c = 73.6  d = 58.5 |
| 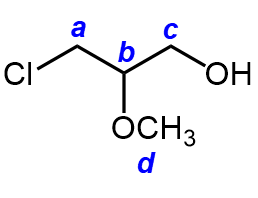Terminal alcohol | a = 44.9 ± 4.8  b = 85.3 ± 3.7  c = 66.9 ± 3.1  d = 58.4 ± 2.6 | COSMO (in Methanol)  a = 52.3  b = 85.7  c = 68.5  d = 59.1 | N/A  (no standard available) |

**Table S8**. Predicted 13C NMR peak shifts for reactants, primary products, and intermediates from the ring-opening of C3H5ClO with CH3OH. These peak shifts were predicted by averaging values and errors obtained from ACD/Labs (v2024) and ChemDraw (version 23.0.1), which were further cross-referenced with reported shifts available in the literature.

| **Binding Structure** | **DFT-Predicted 13C Shifts (ppm)** |
| --- | --- |
| 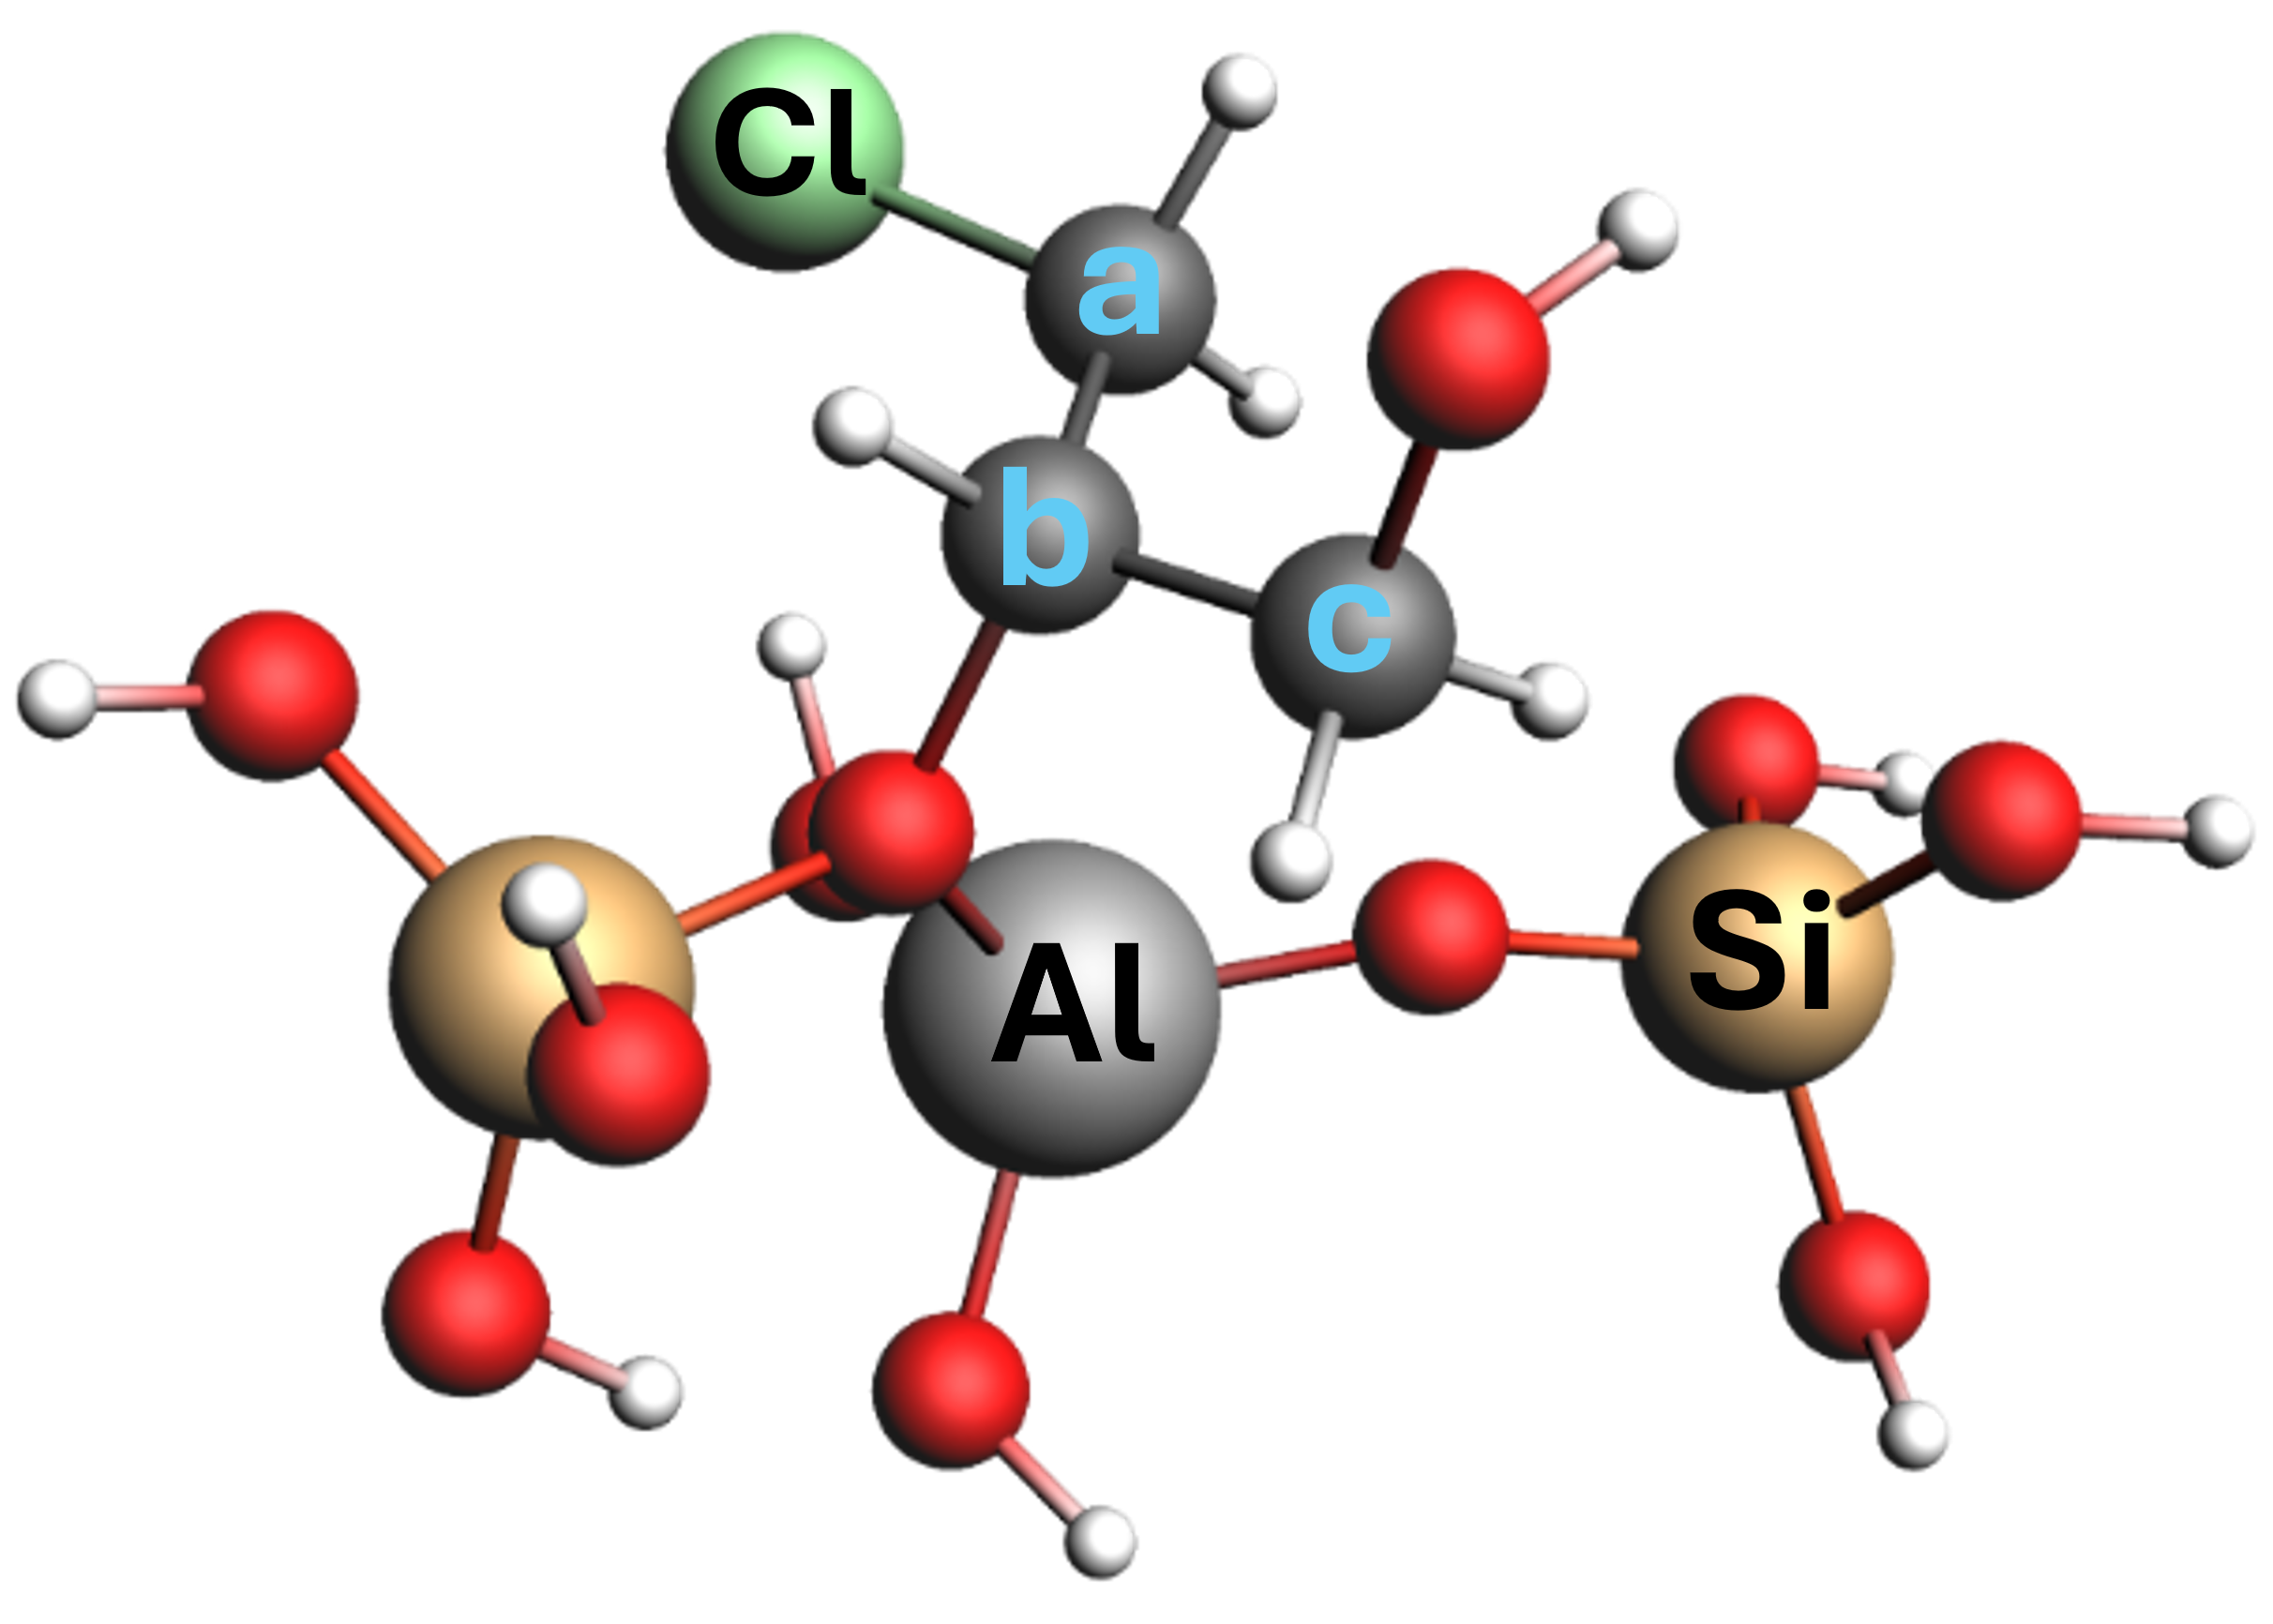  Secondary carbocation (derived from C3H5ClO)  (bound to Al-BEA) | COSMO (in Methanol)  a = 49.6  b = 89.0  c= 63.0 |
| 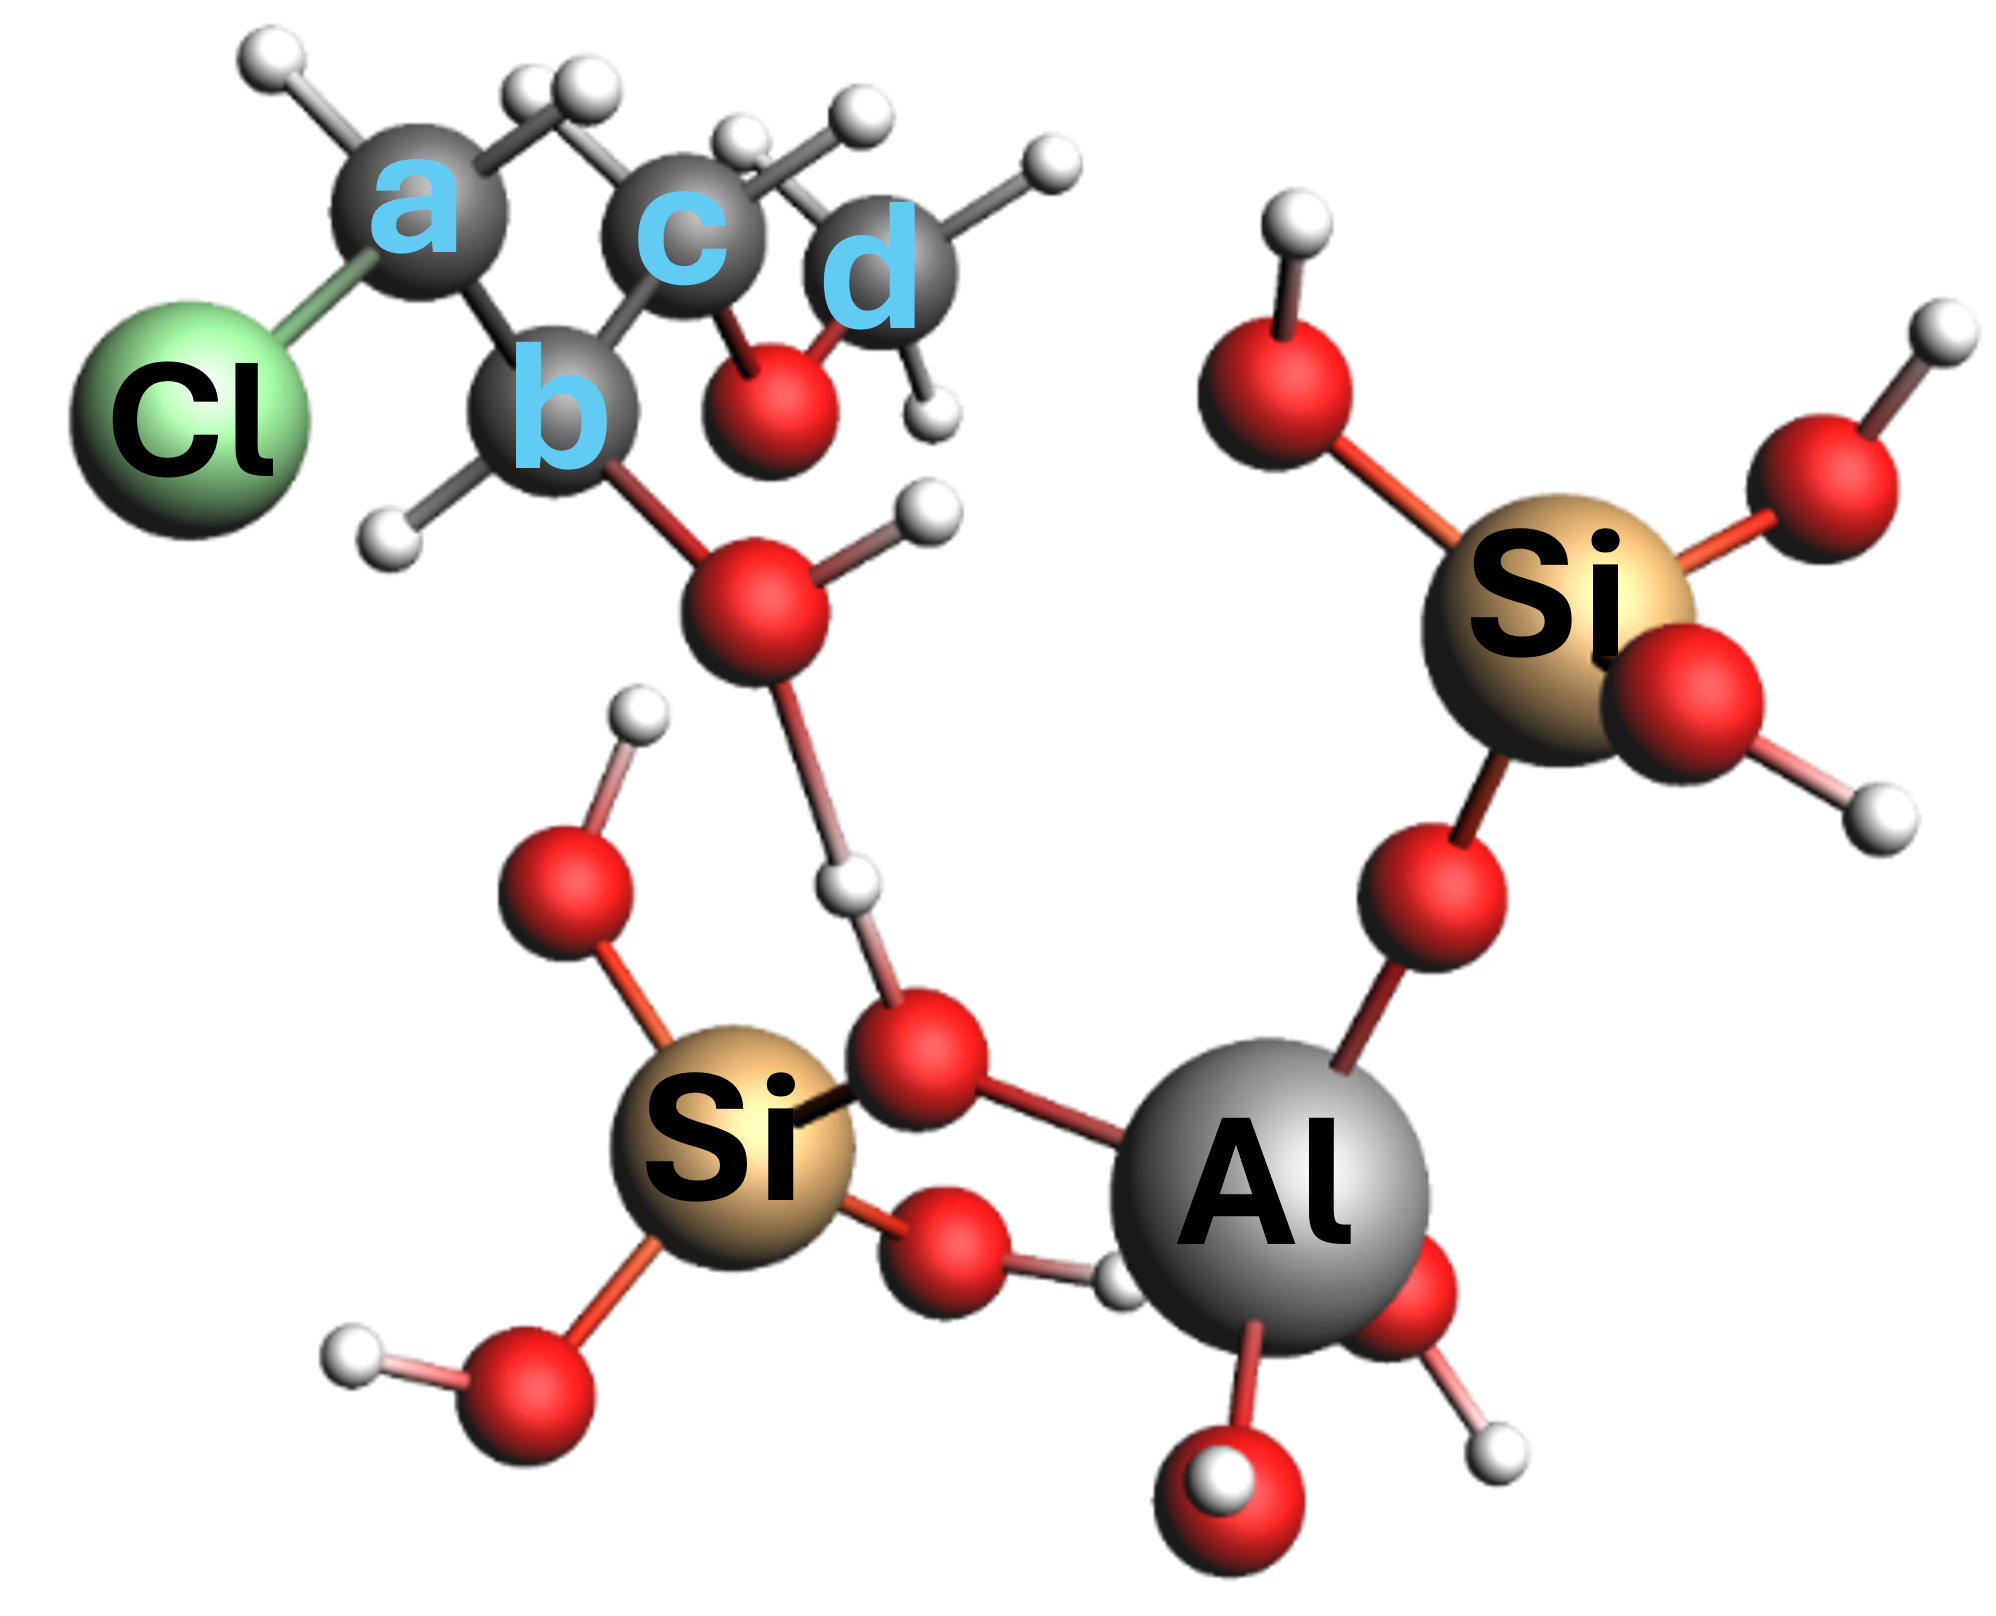  Terminal ether bound at Brønsted acid site in Al-BEA | COSMO(Methanol)  a=51.5  b=77.2  c=73.6  d=55.8 |
| 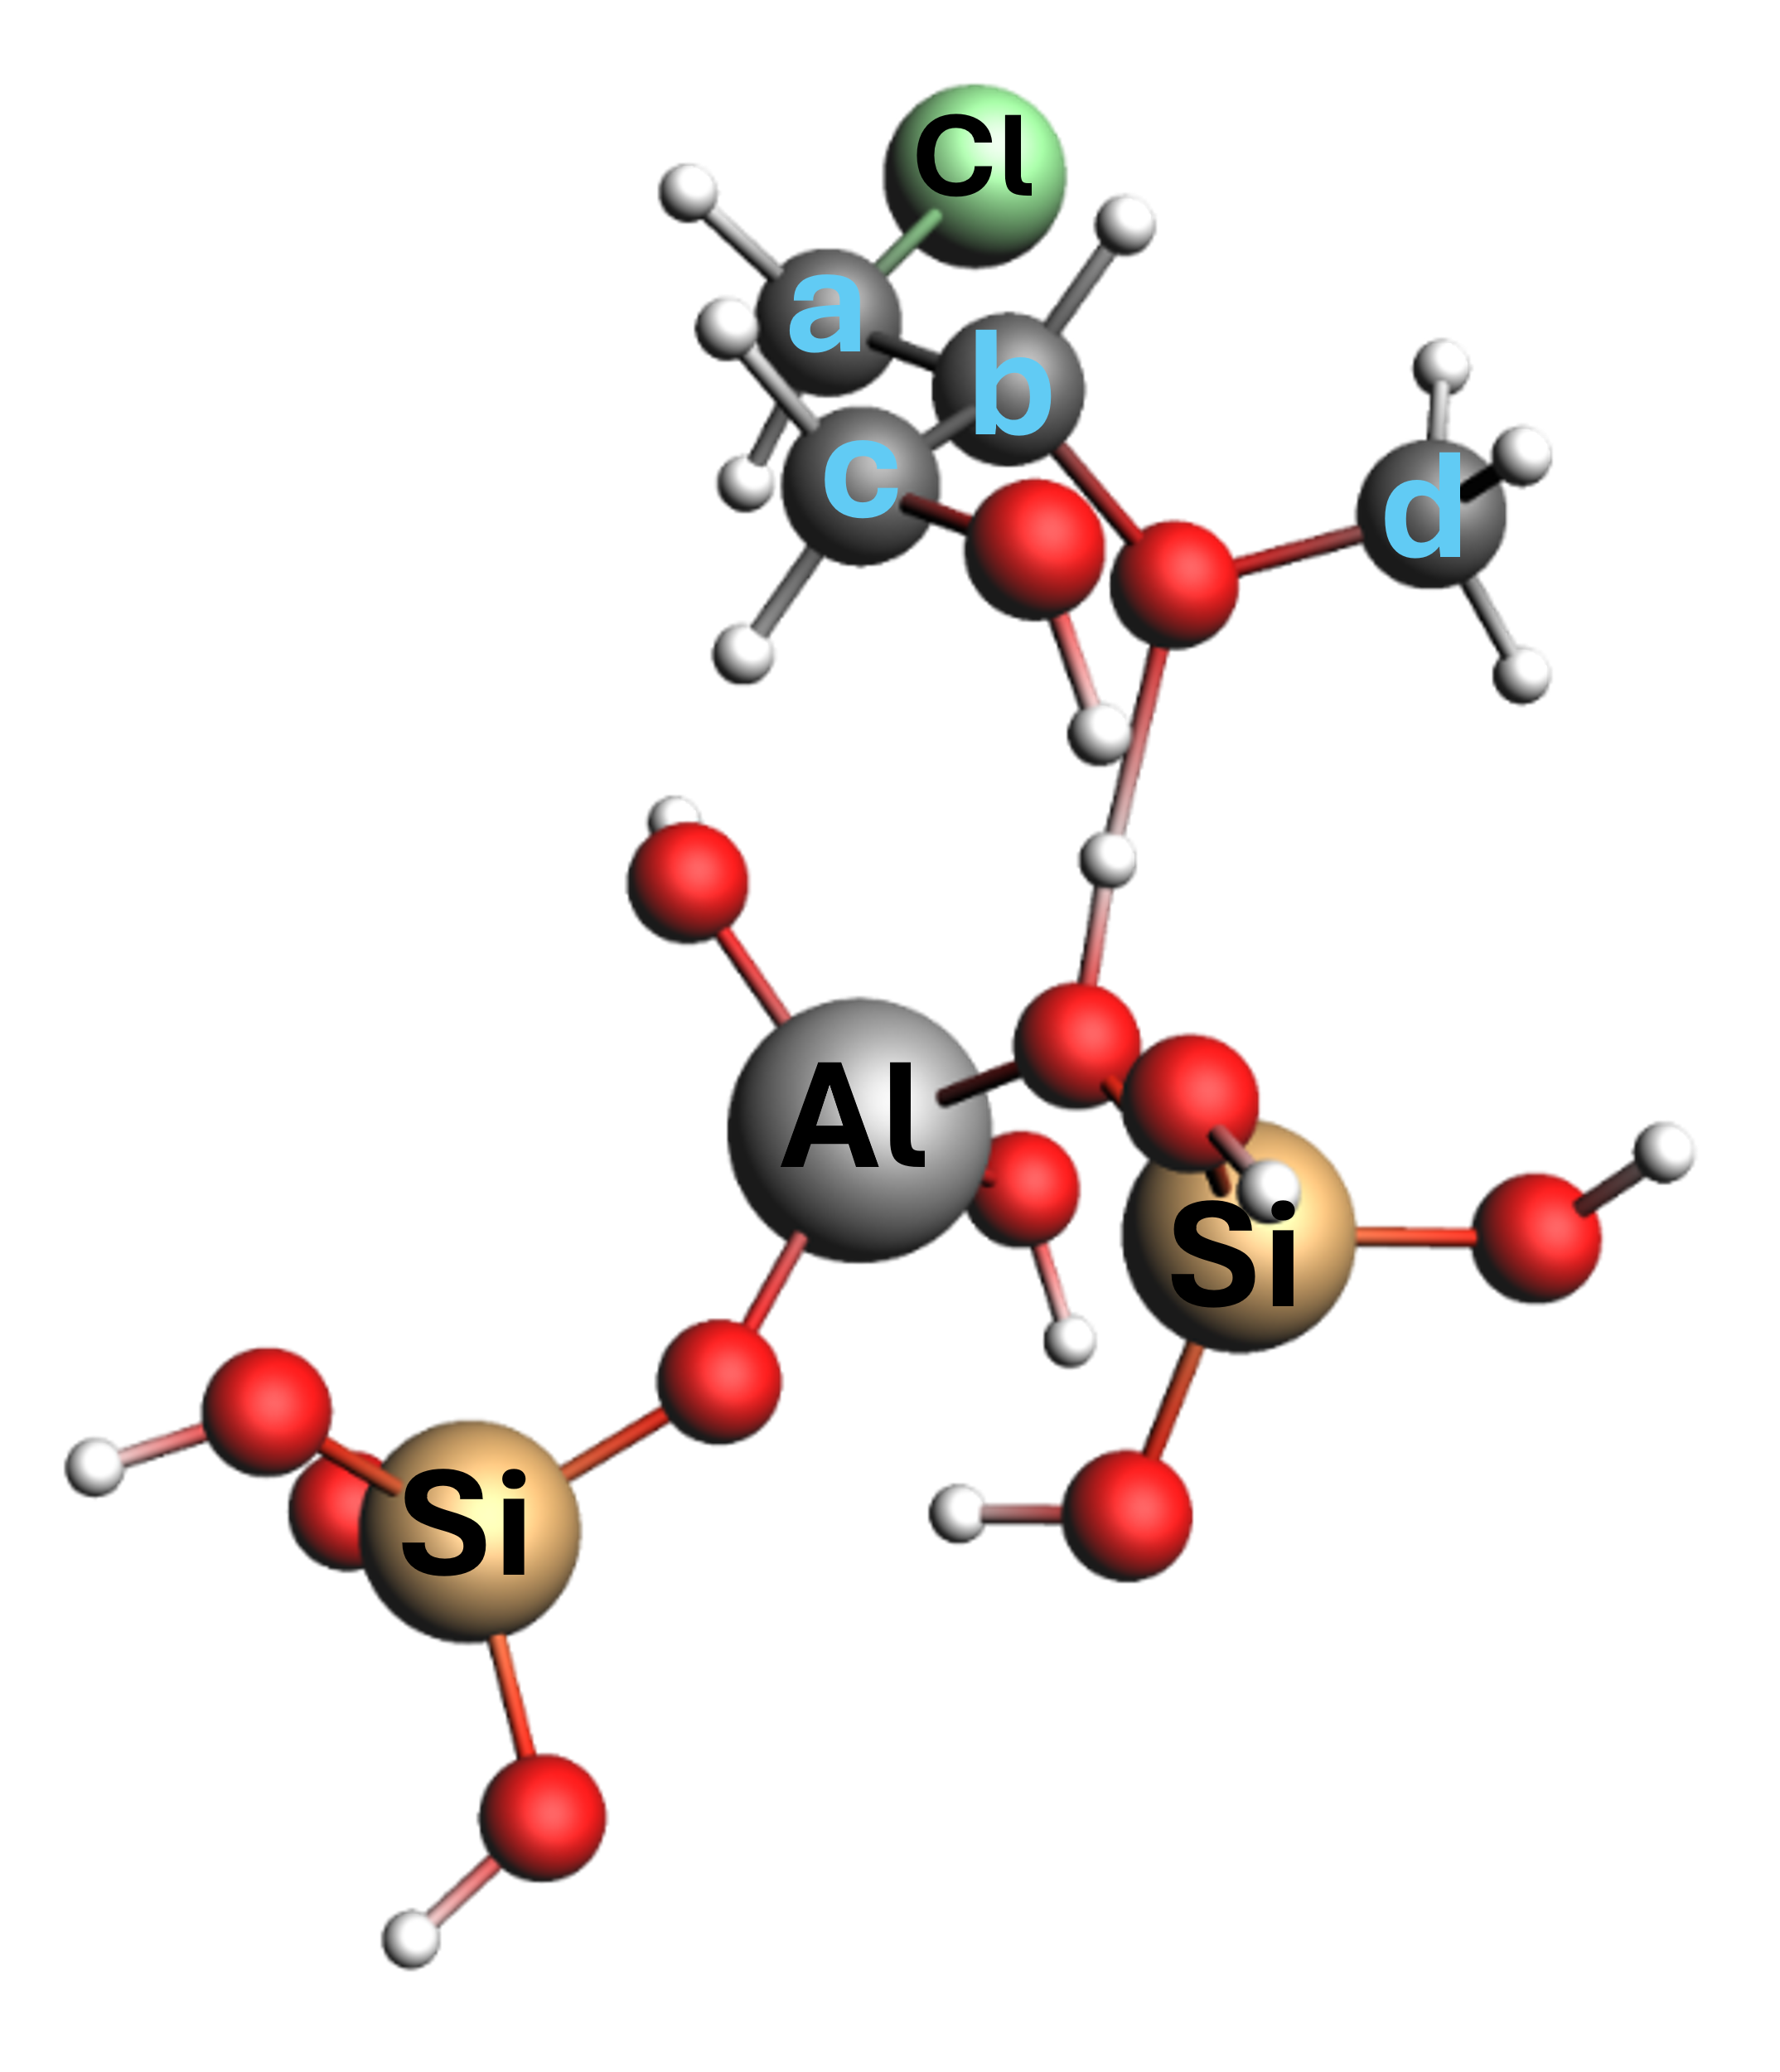    Terminal alcohol bound at Brønsted acid site in Al-BEA | COSMO(Methanol)  a=50.9  b=91.6  c=61.8  d=59.8 |
| 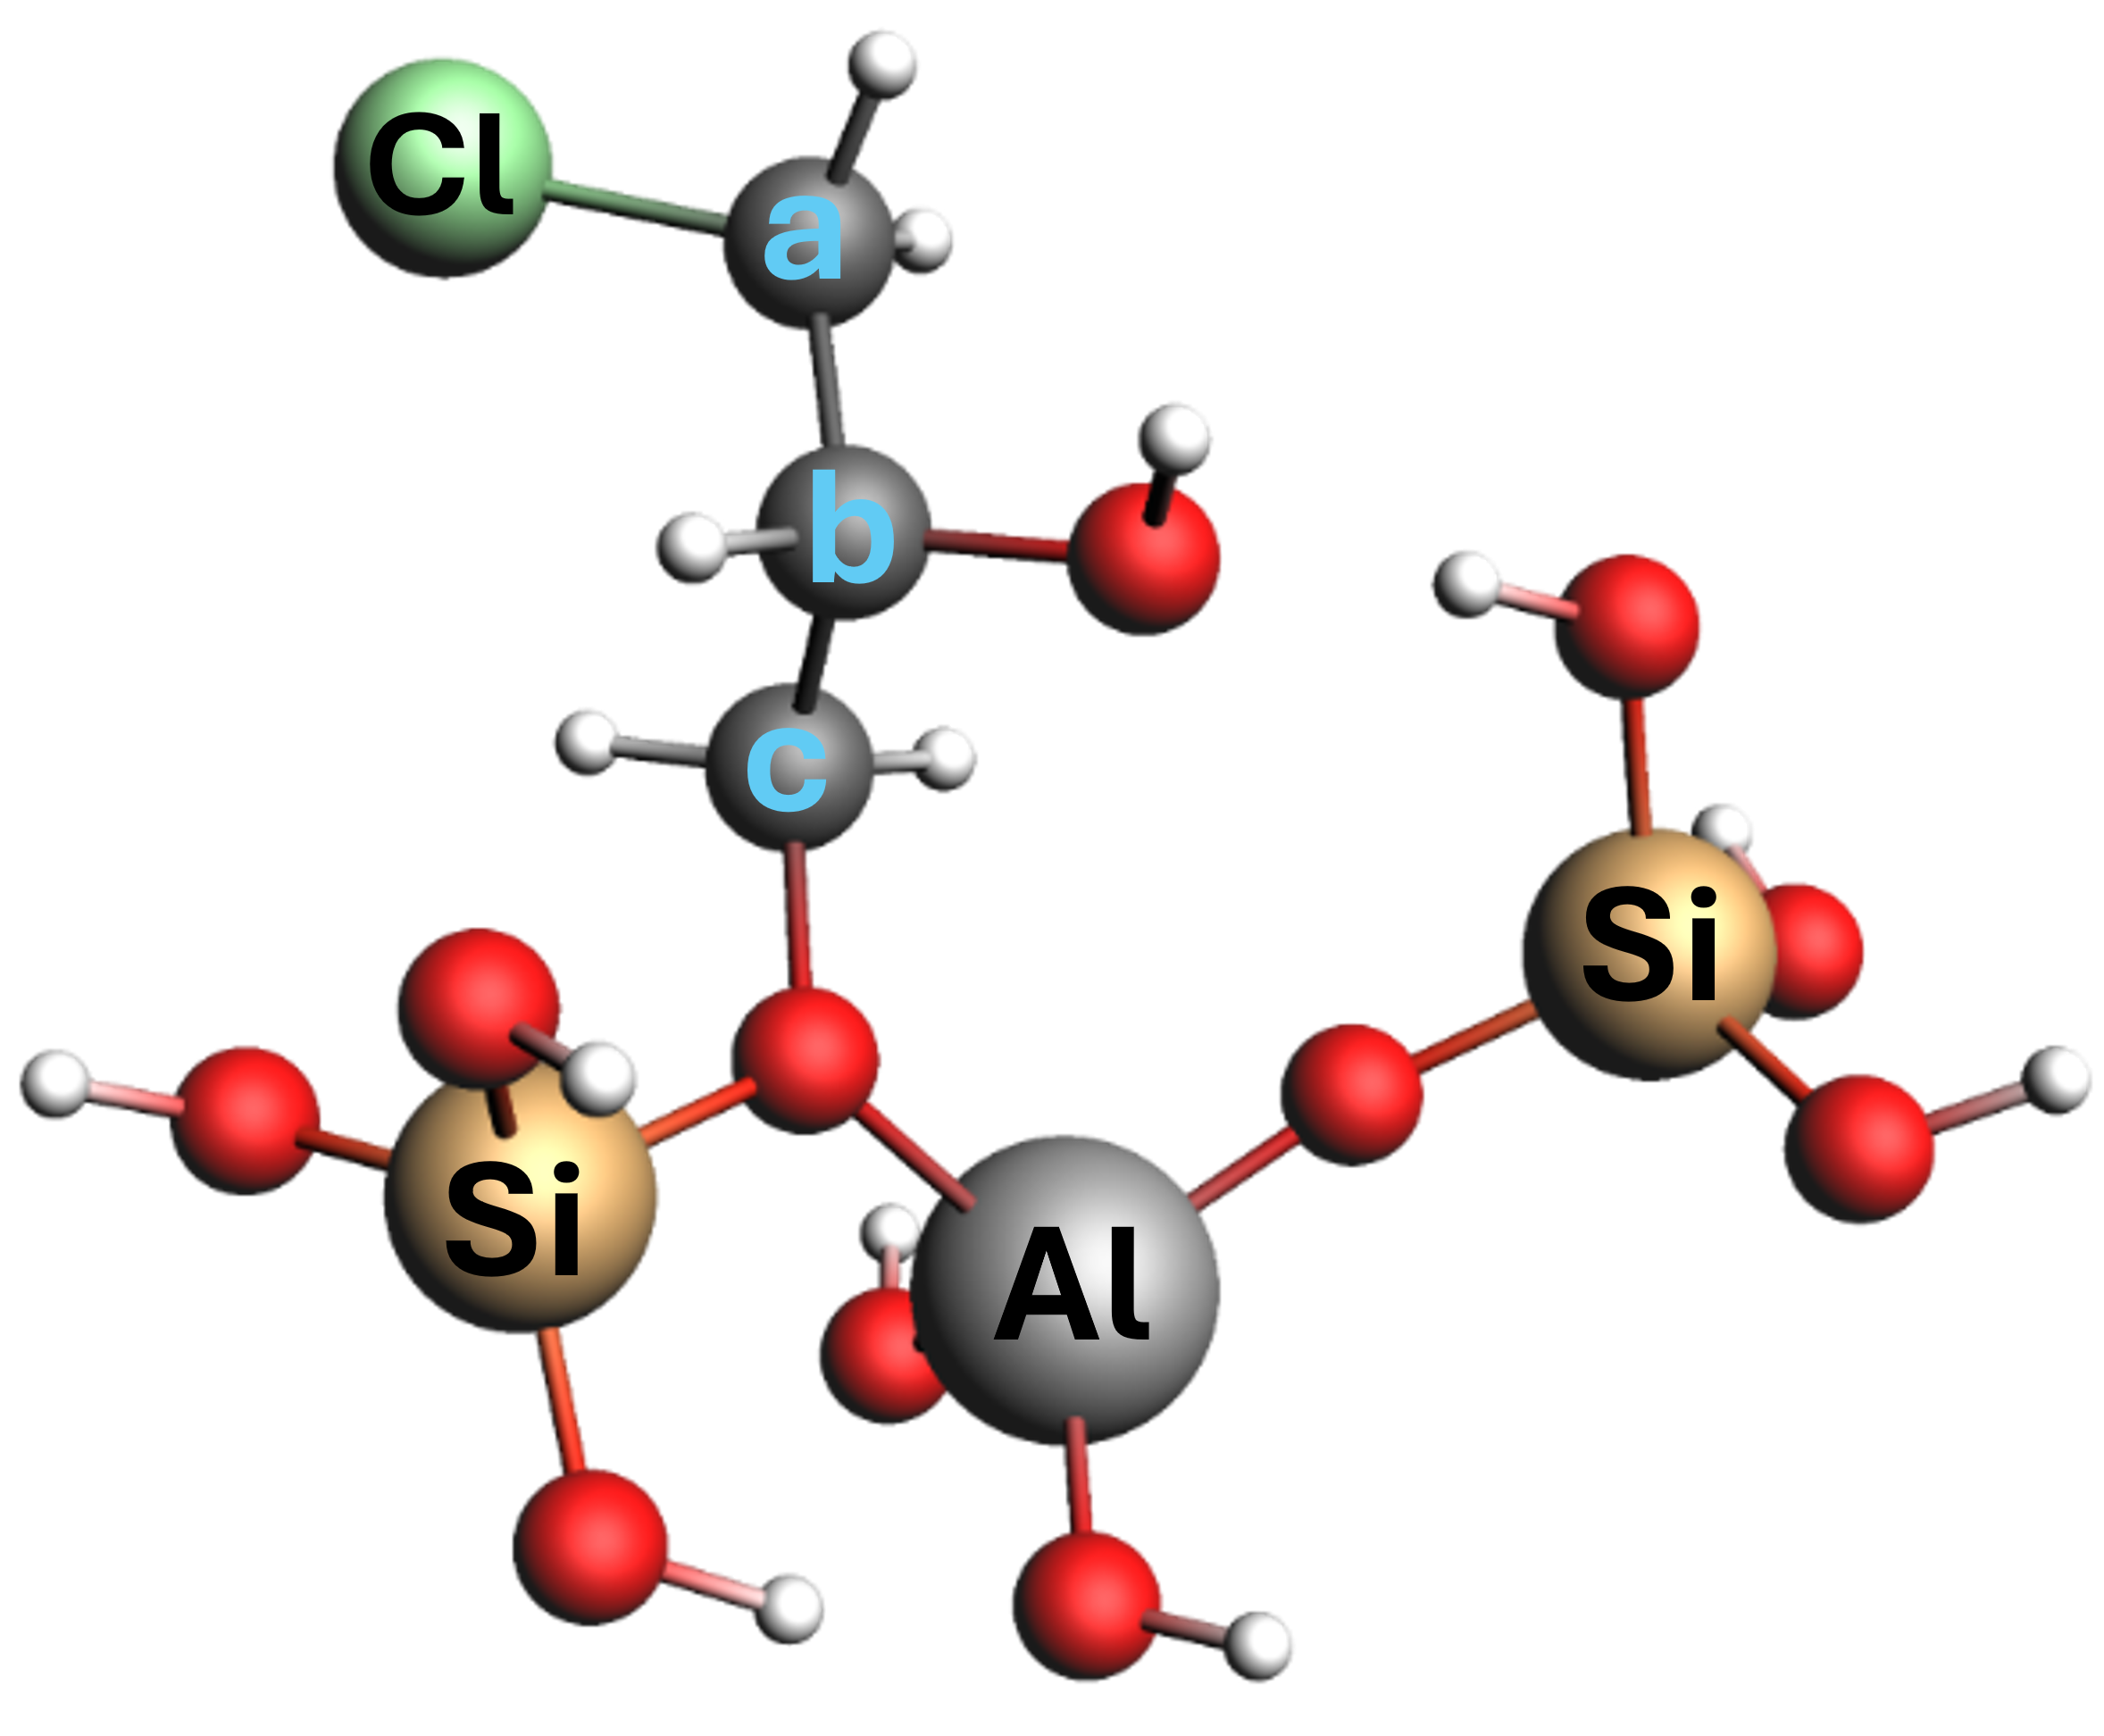  Primary carbocation (derived from C3H5ClO)  (bound to Brønsted acid site in Al-BEA) | COSMO(Methanol)  a=47.0  b=74.6  c=71.1 |

| 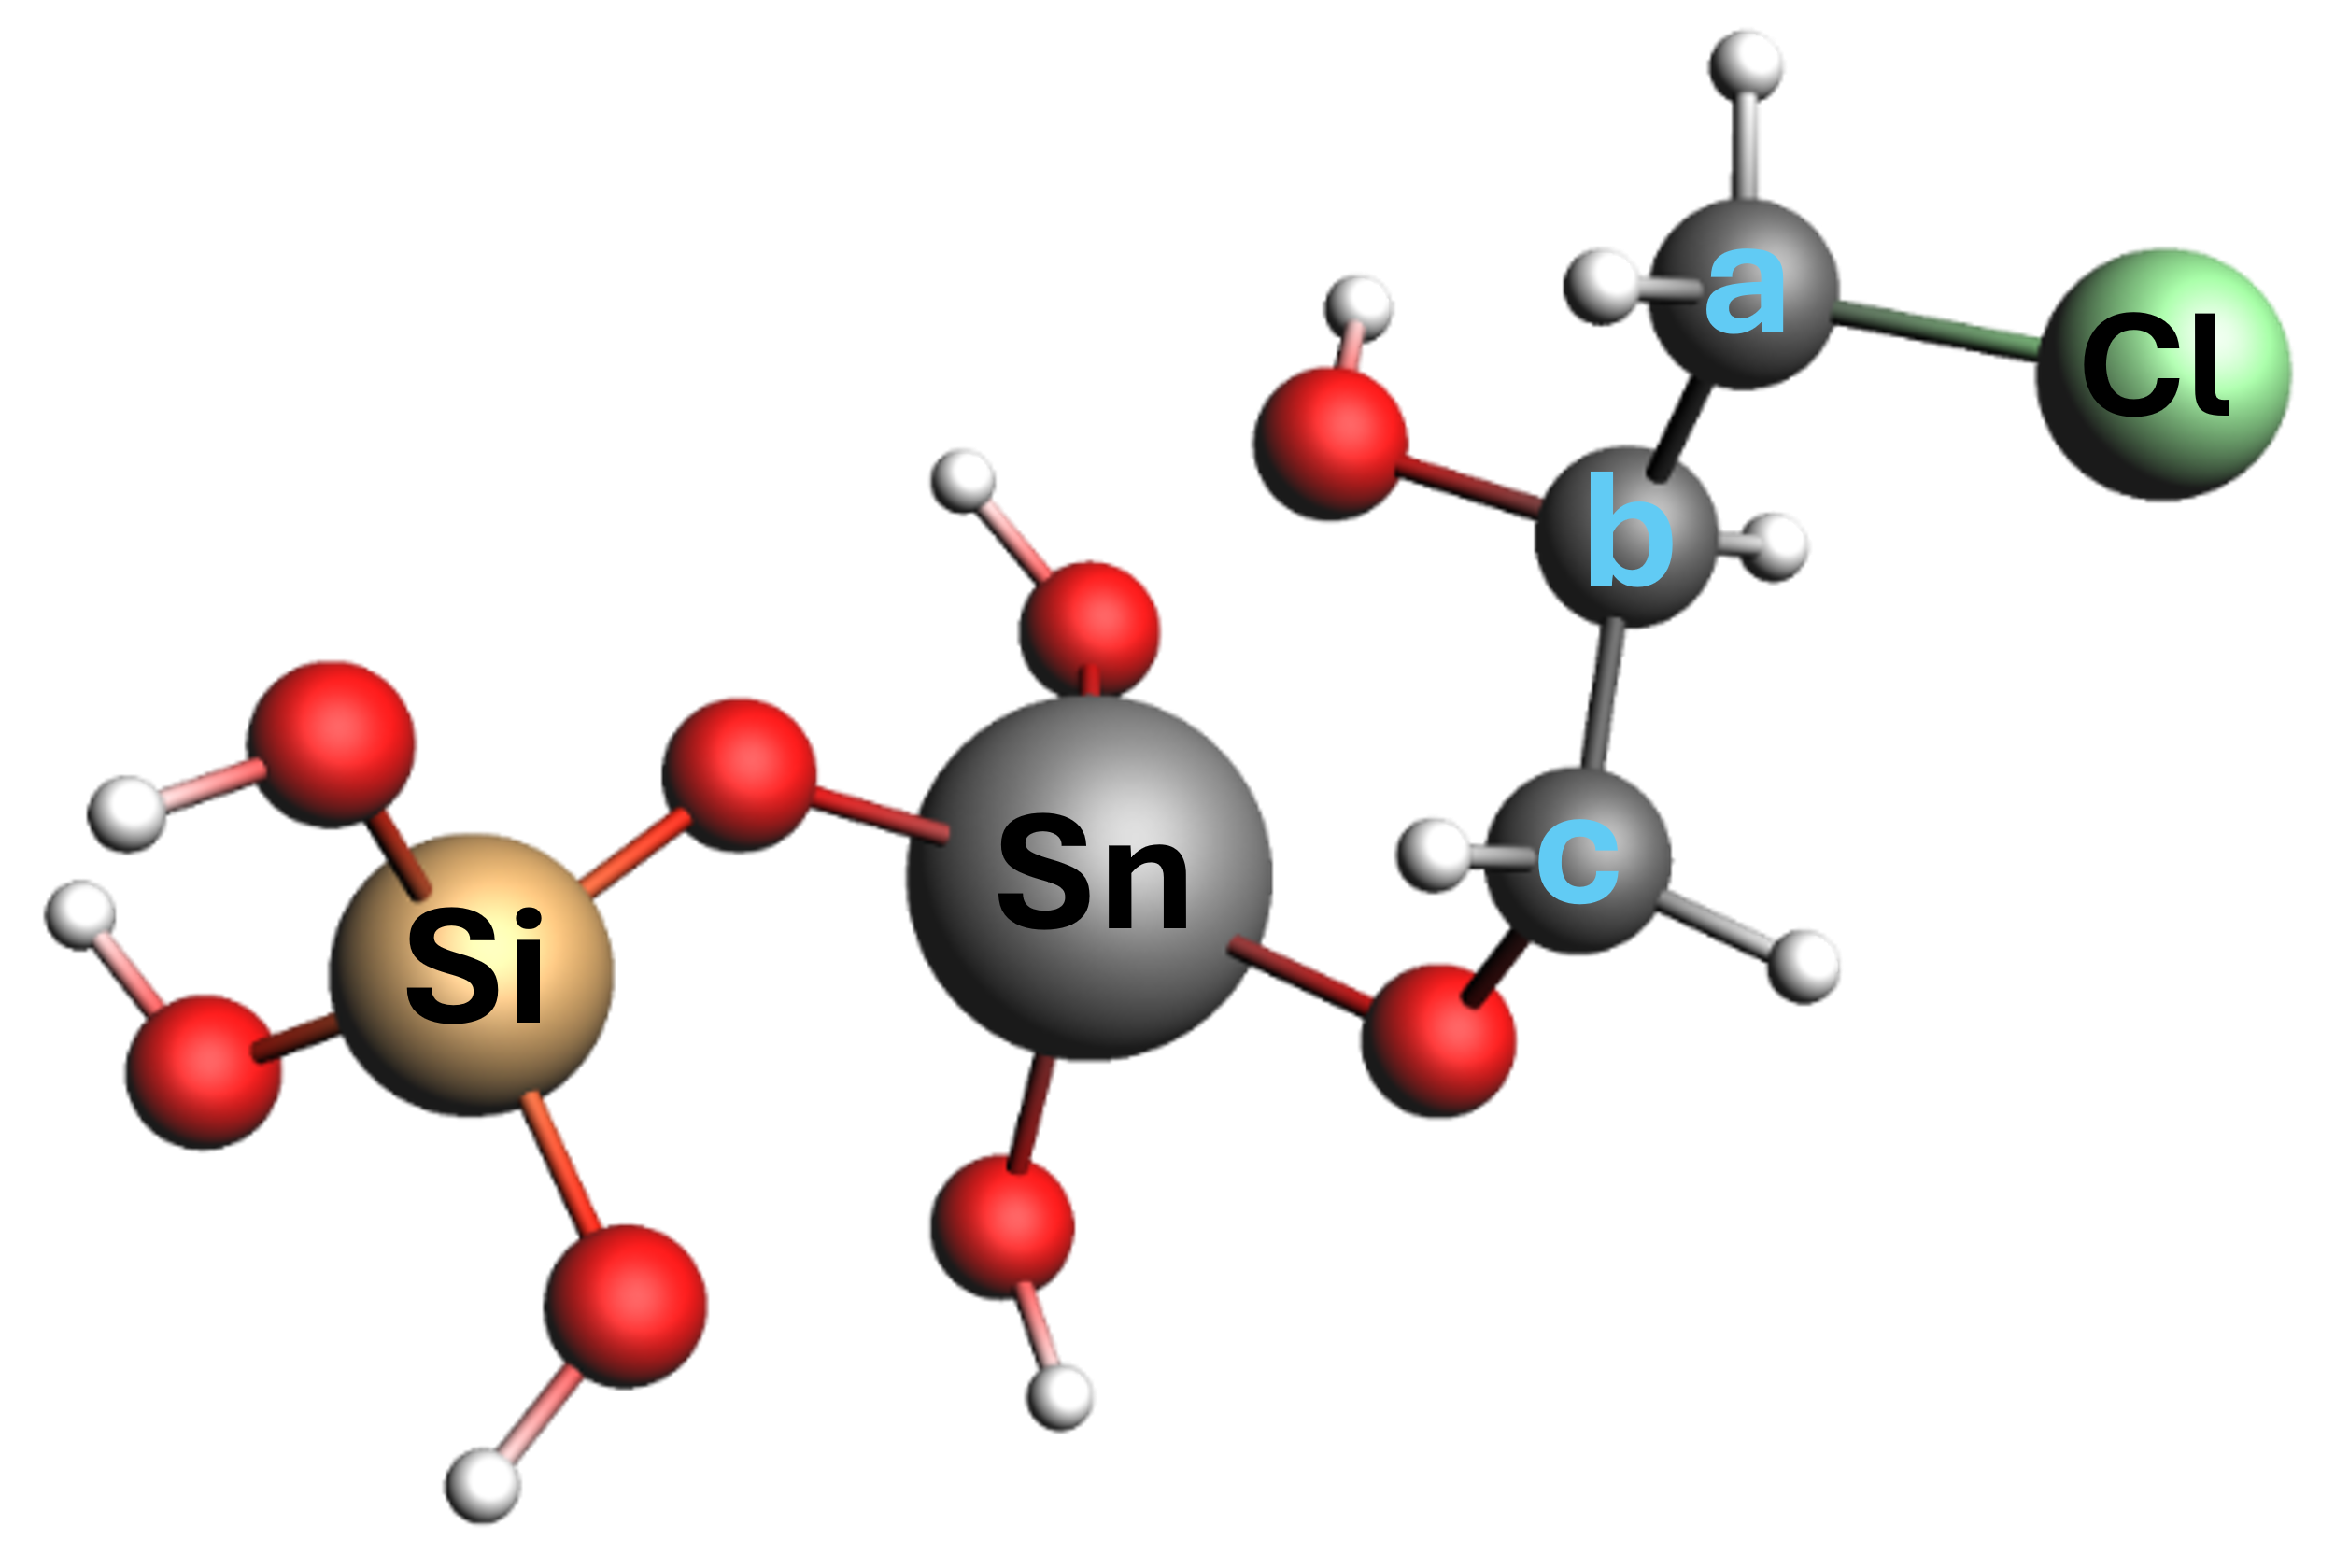  Primary carbocation bound to Sn-BEA | COSMO (Methanol)  a=49.3  b=72.5  c=67.3 |
| --- | --- |
| 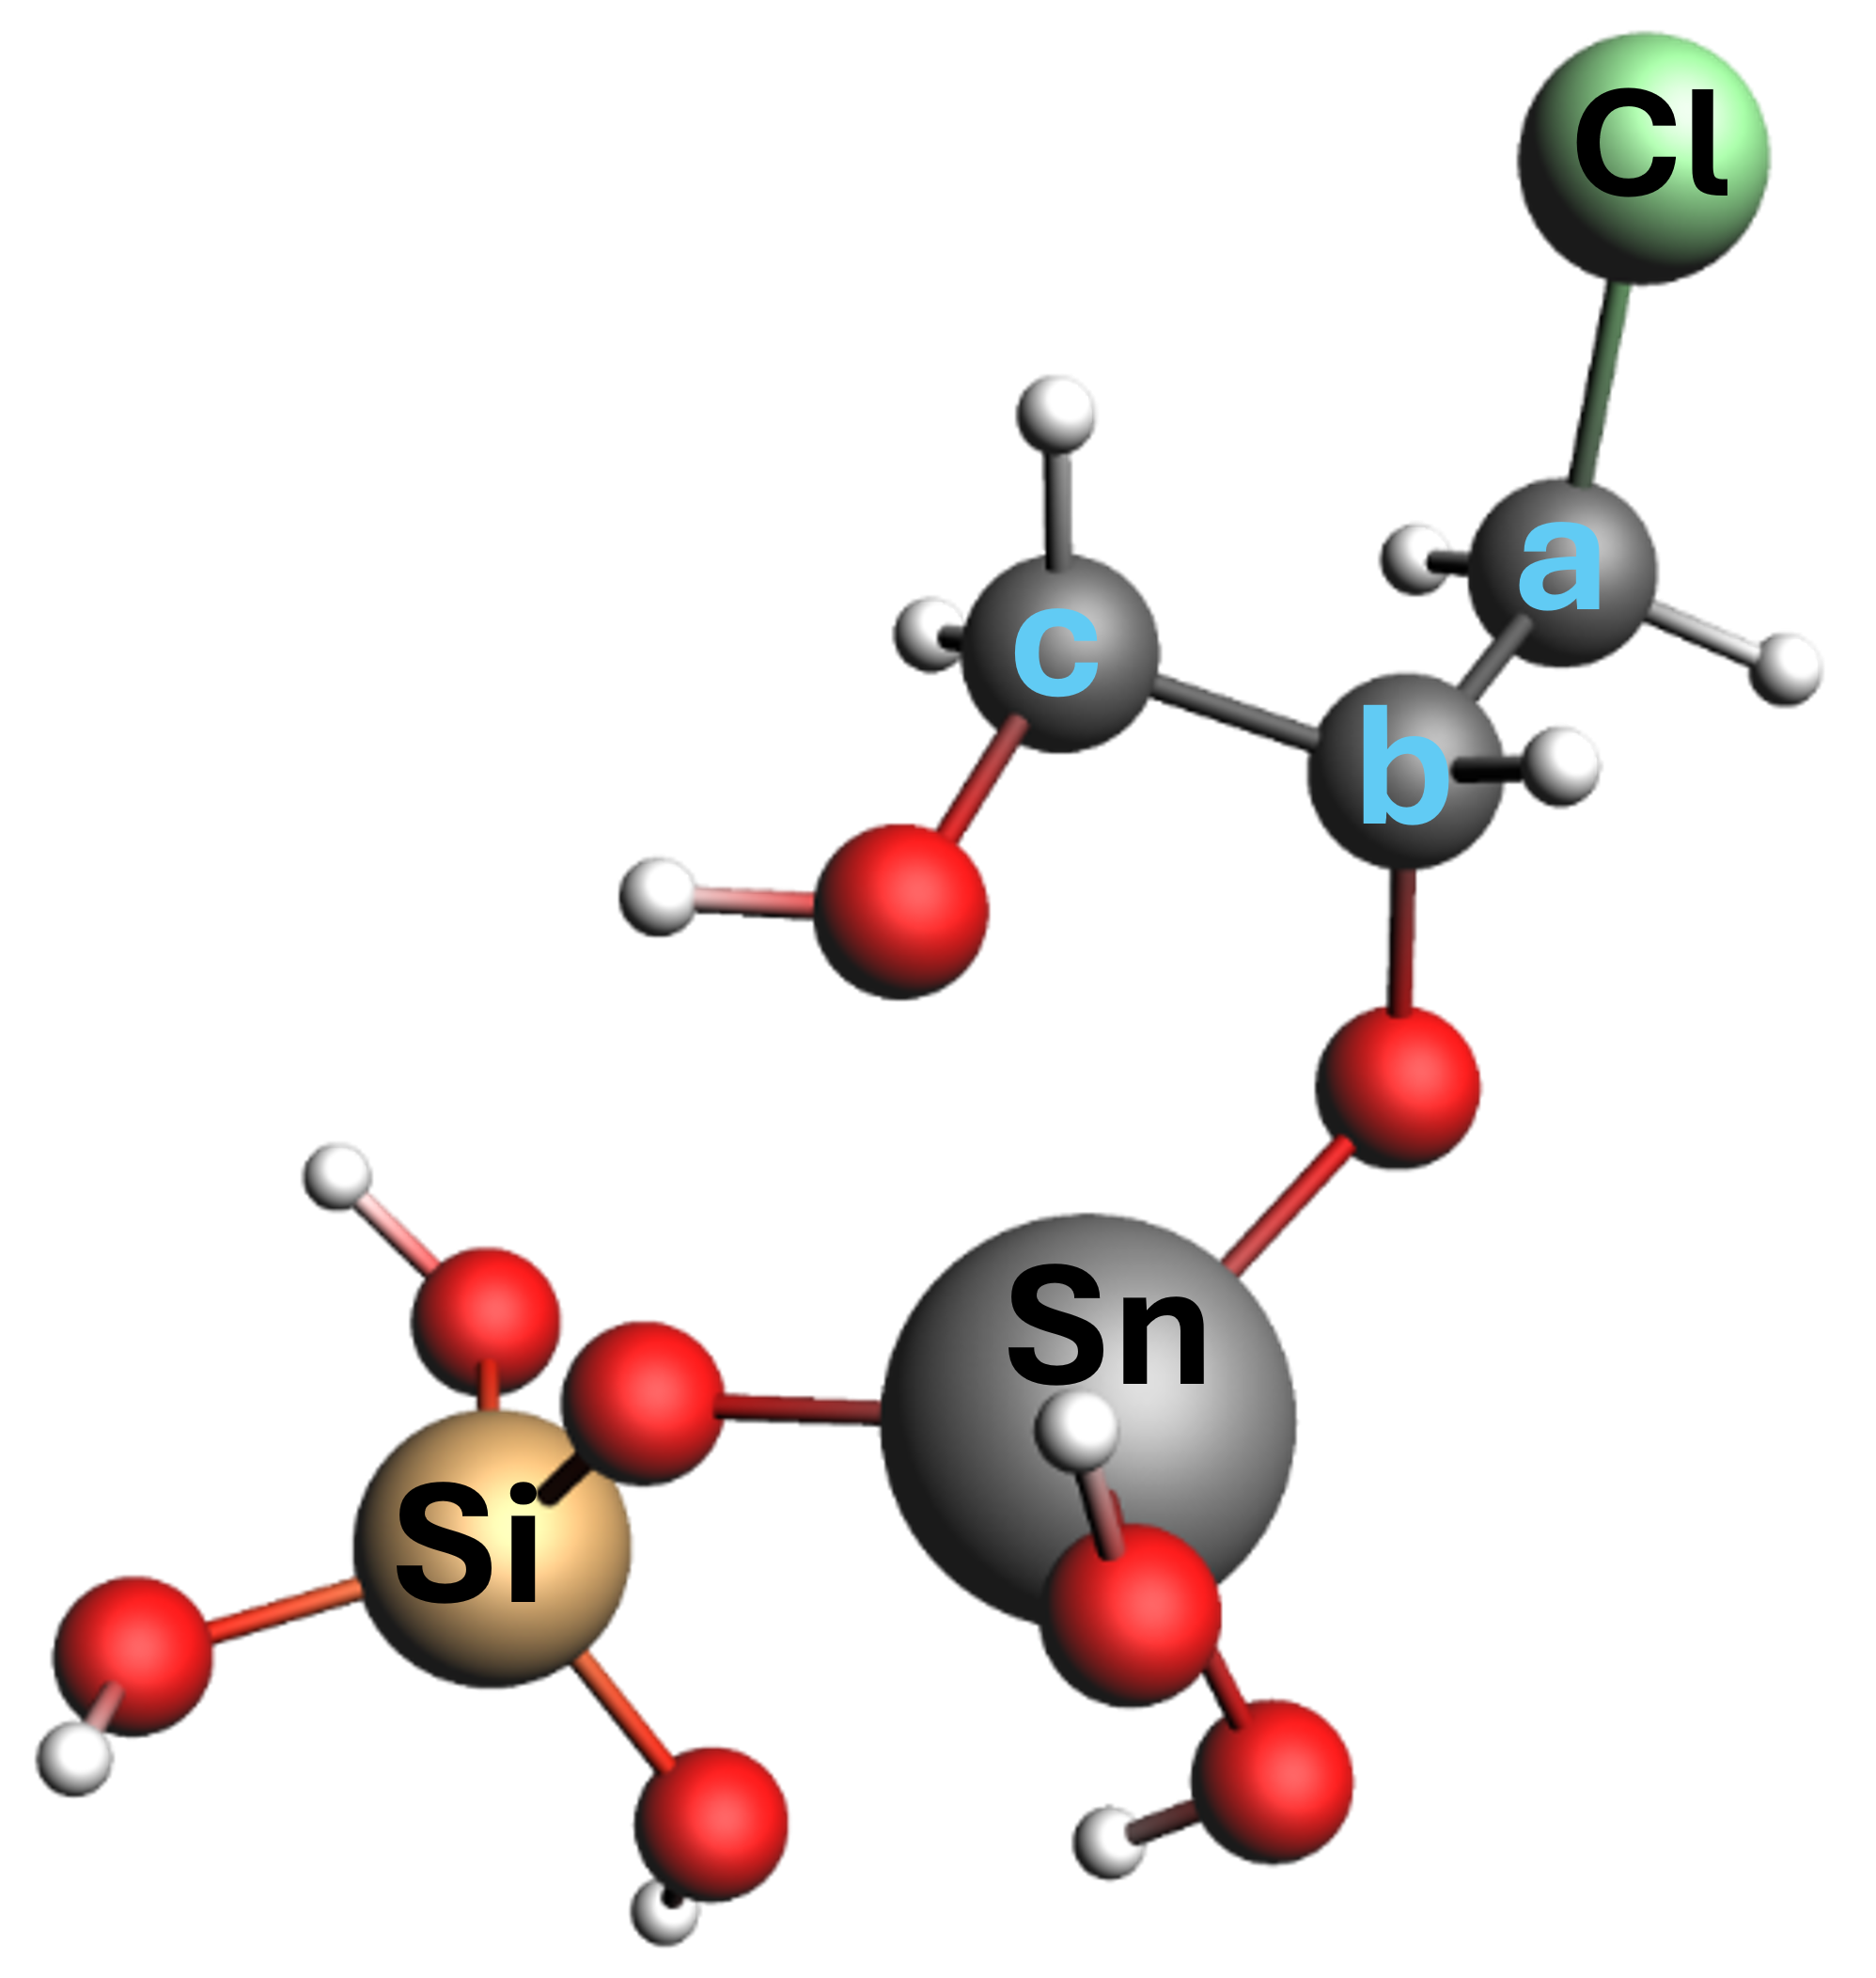  Secondary carbocation bound to Sn-BEA | COSMO (Methanol)  a=47.5  b=76.2  c=64.7 |
| 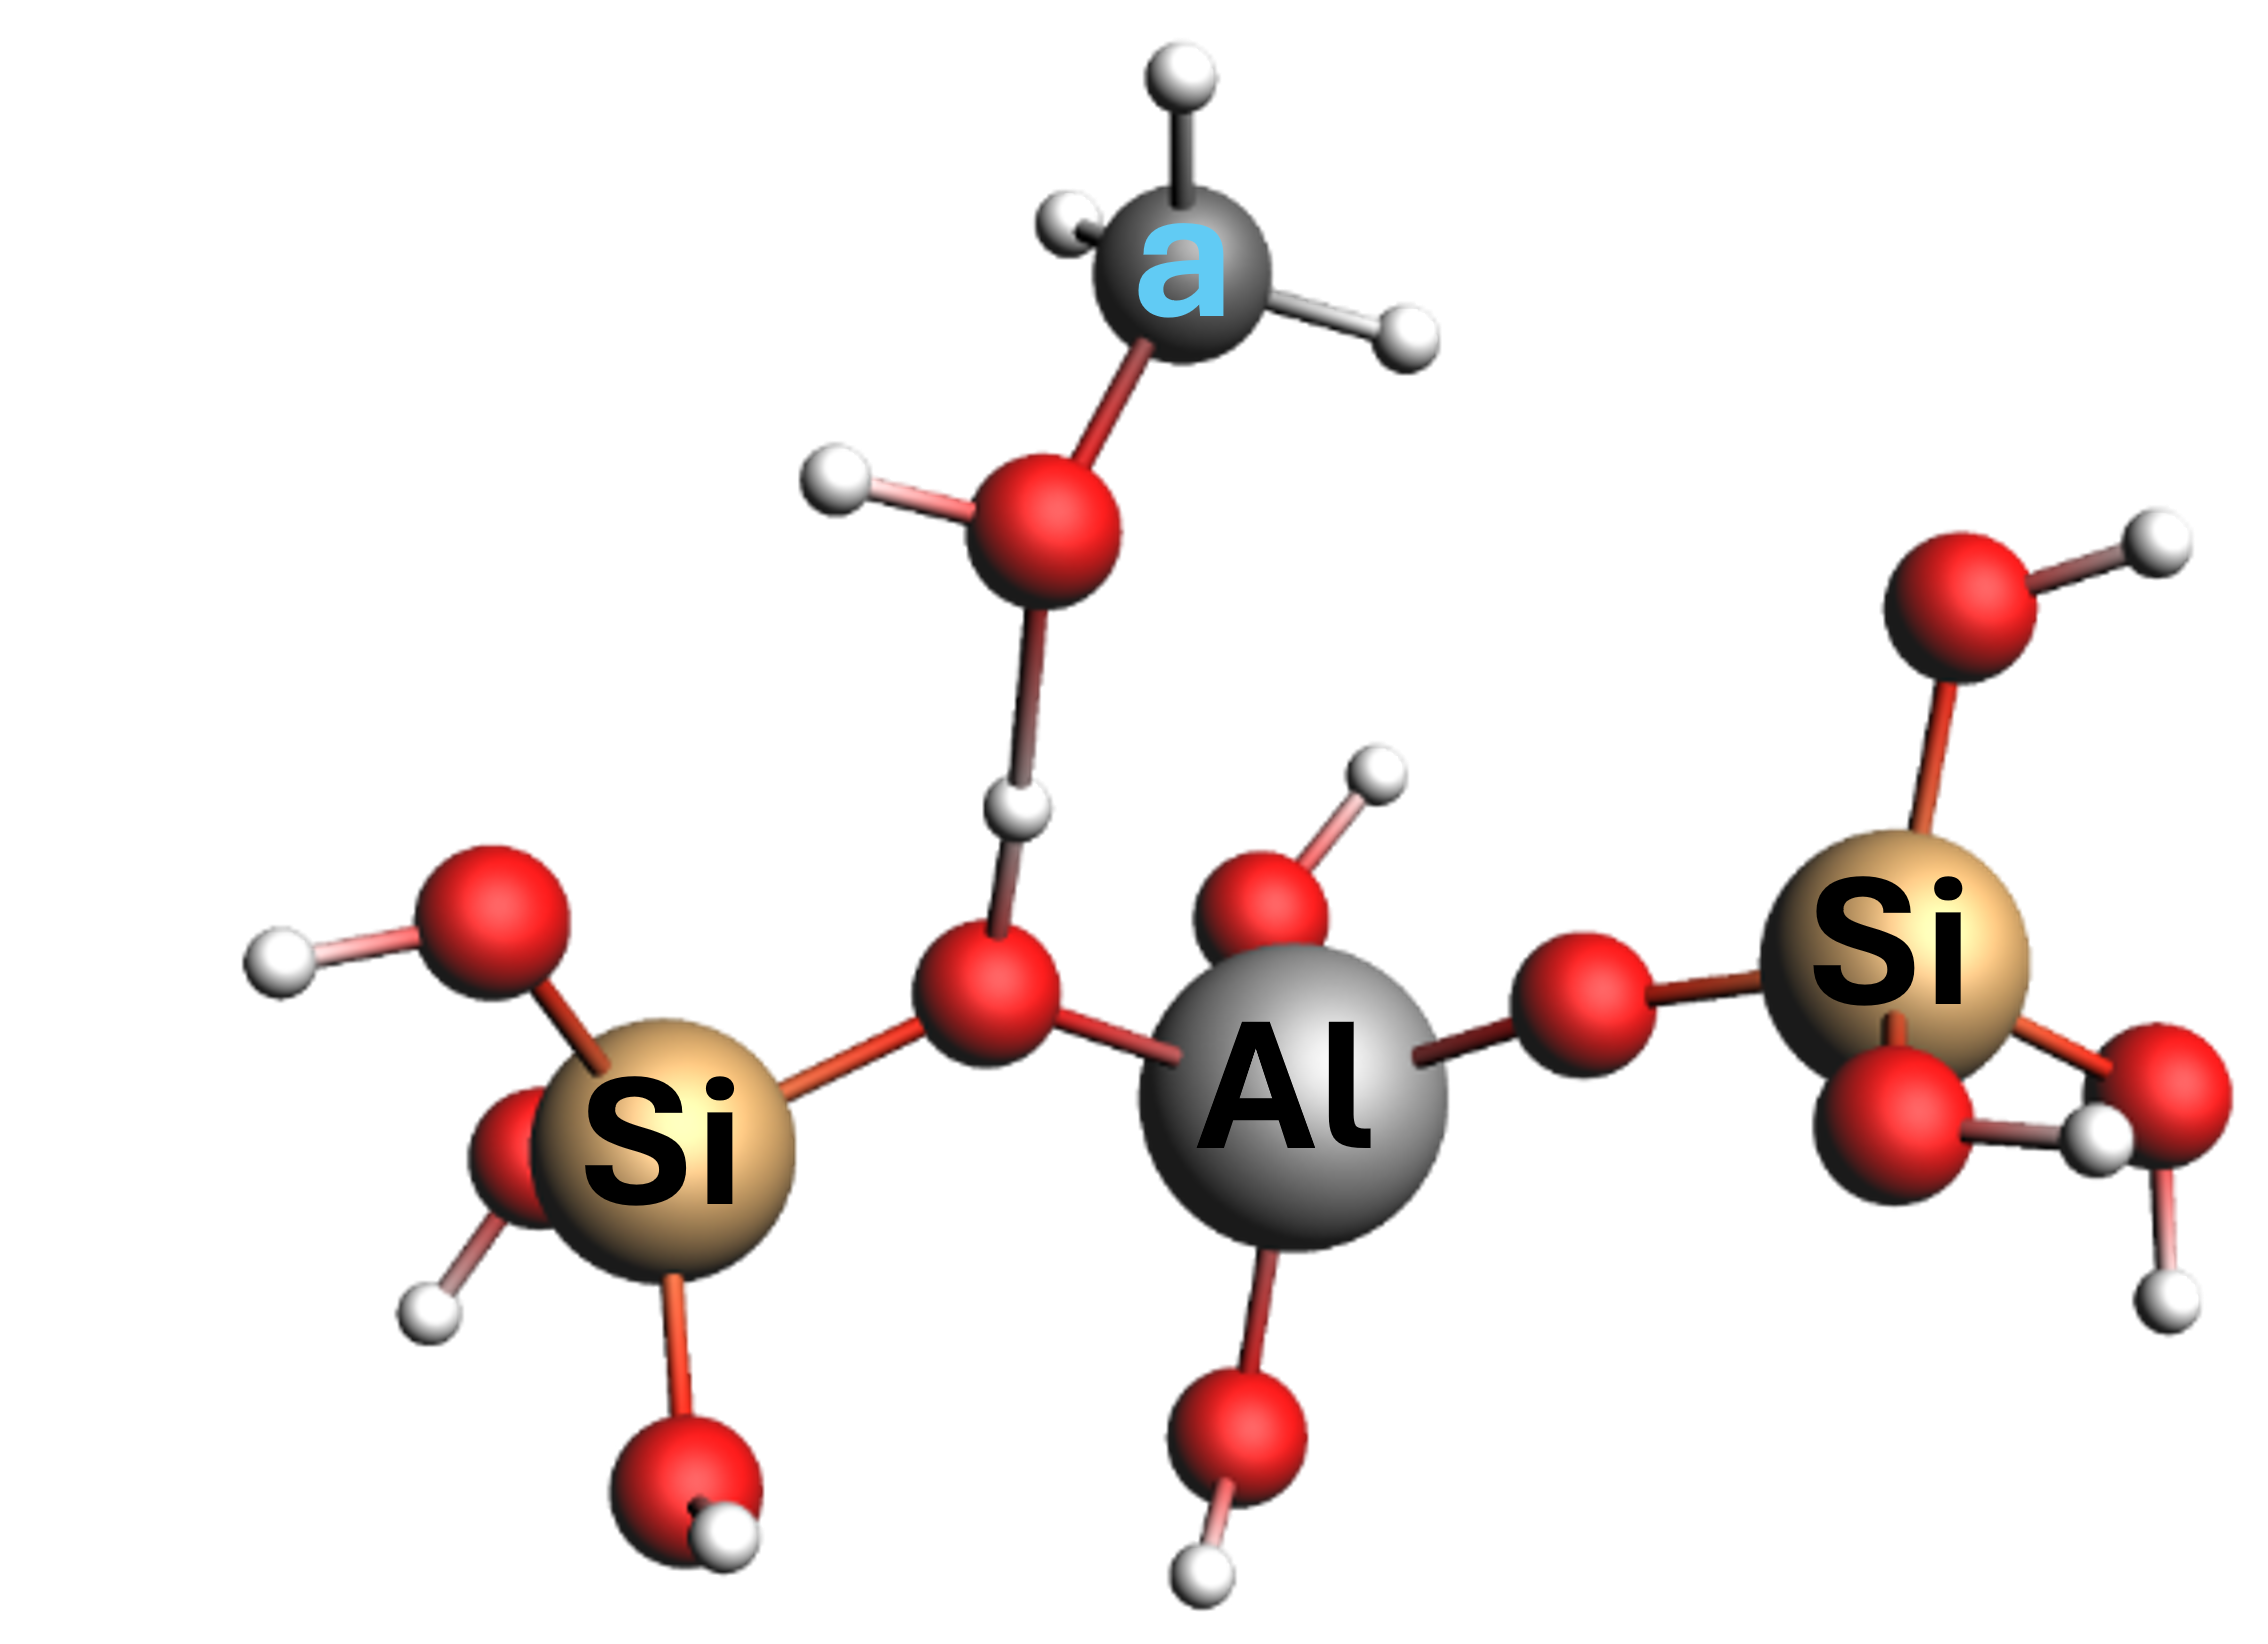  Methanol bound at Brønsted acid site in Al-BEA | COSMO(Methanol)  a=49.6  O (methanol)-H (BAS) bond length = 1.519 Å  H-O (BAS) bond length = 1.047 Å |
| 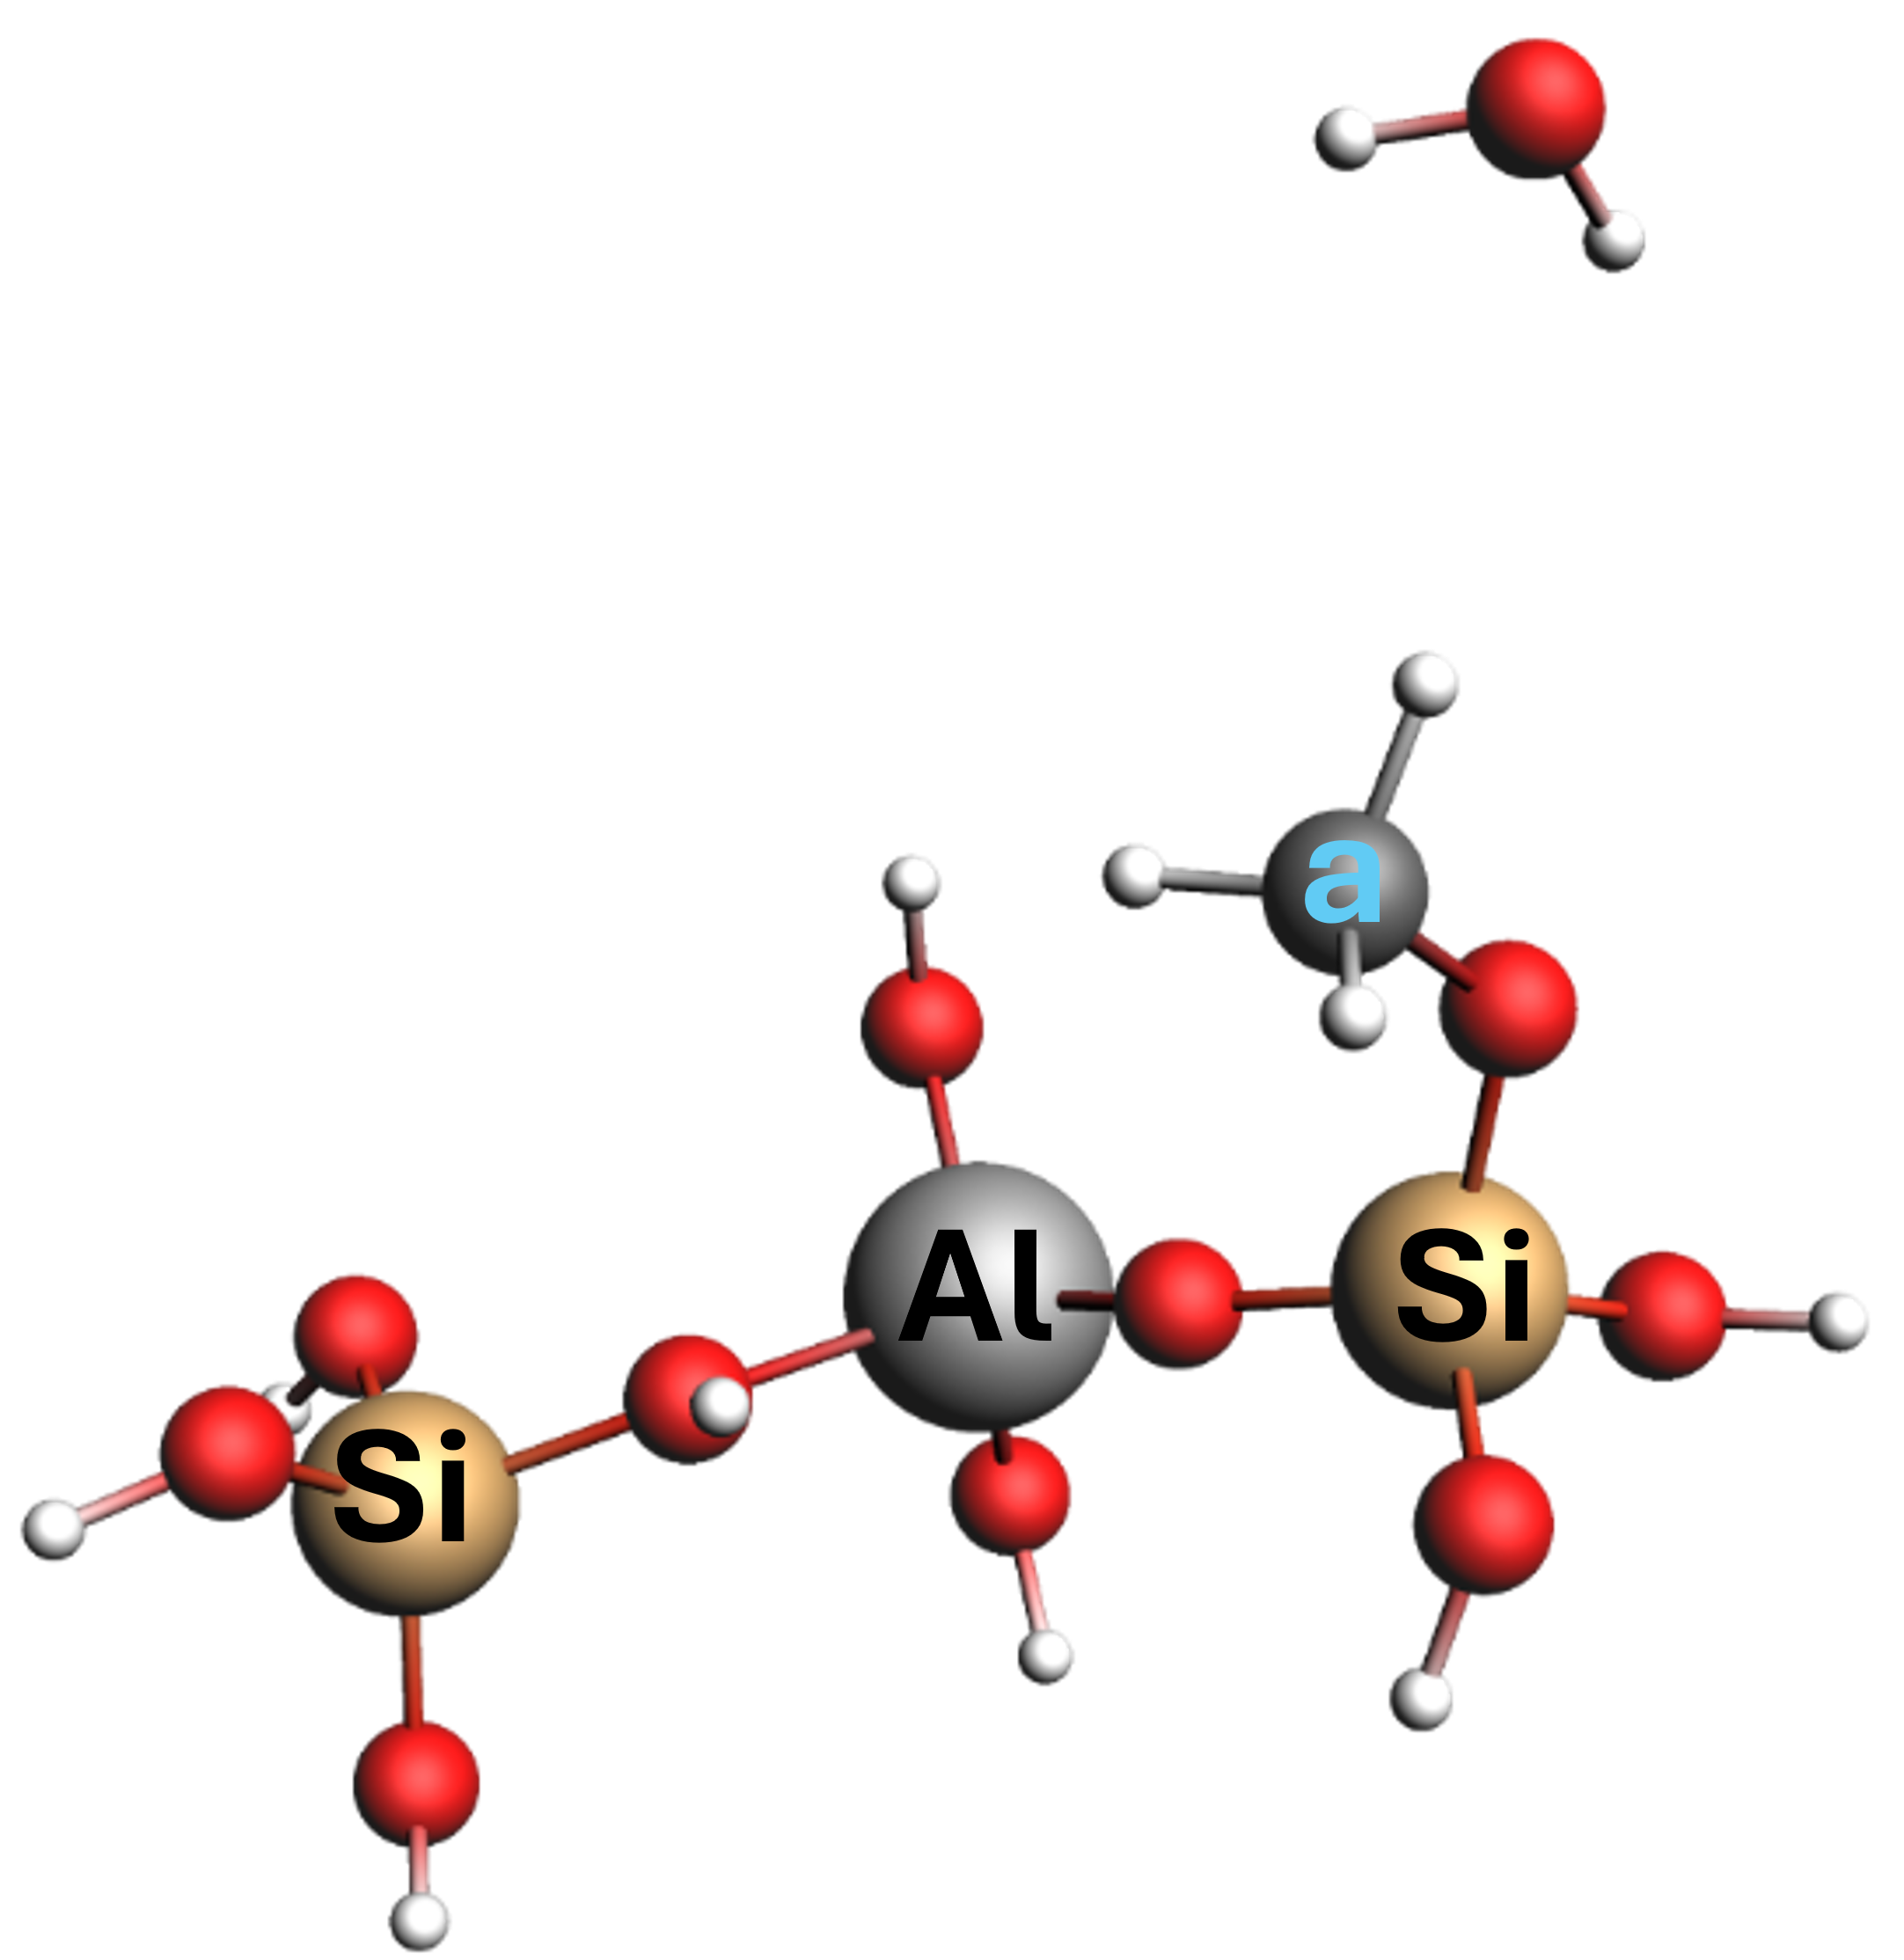  Methoxy bound at Si adjacent to Brønsted acid site in Al-BEA (with eliminated H2O from CH3OH) | COSMO(Methanol)  a=48.5 |
| 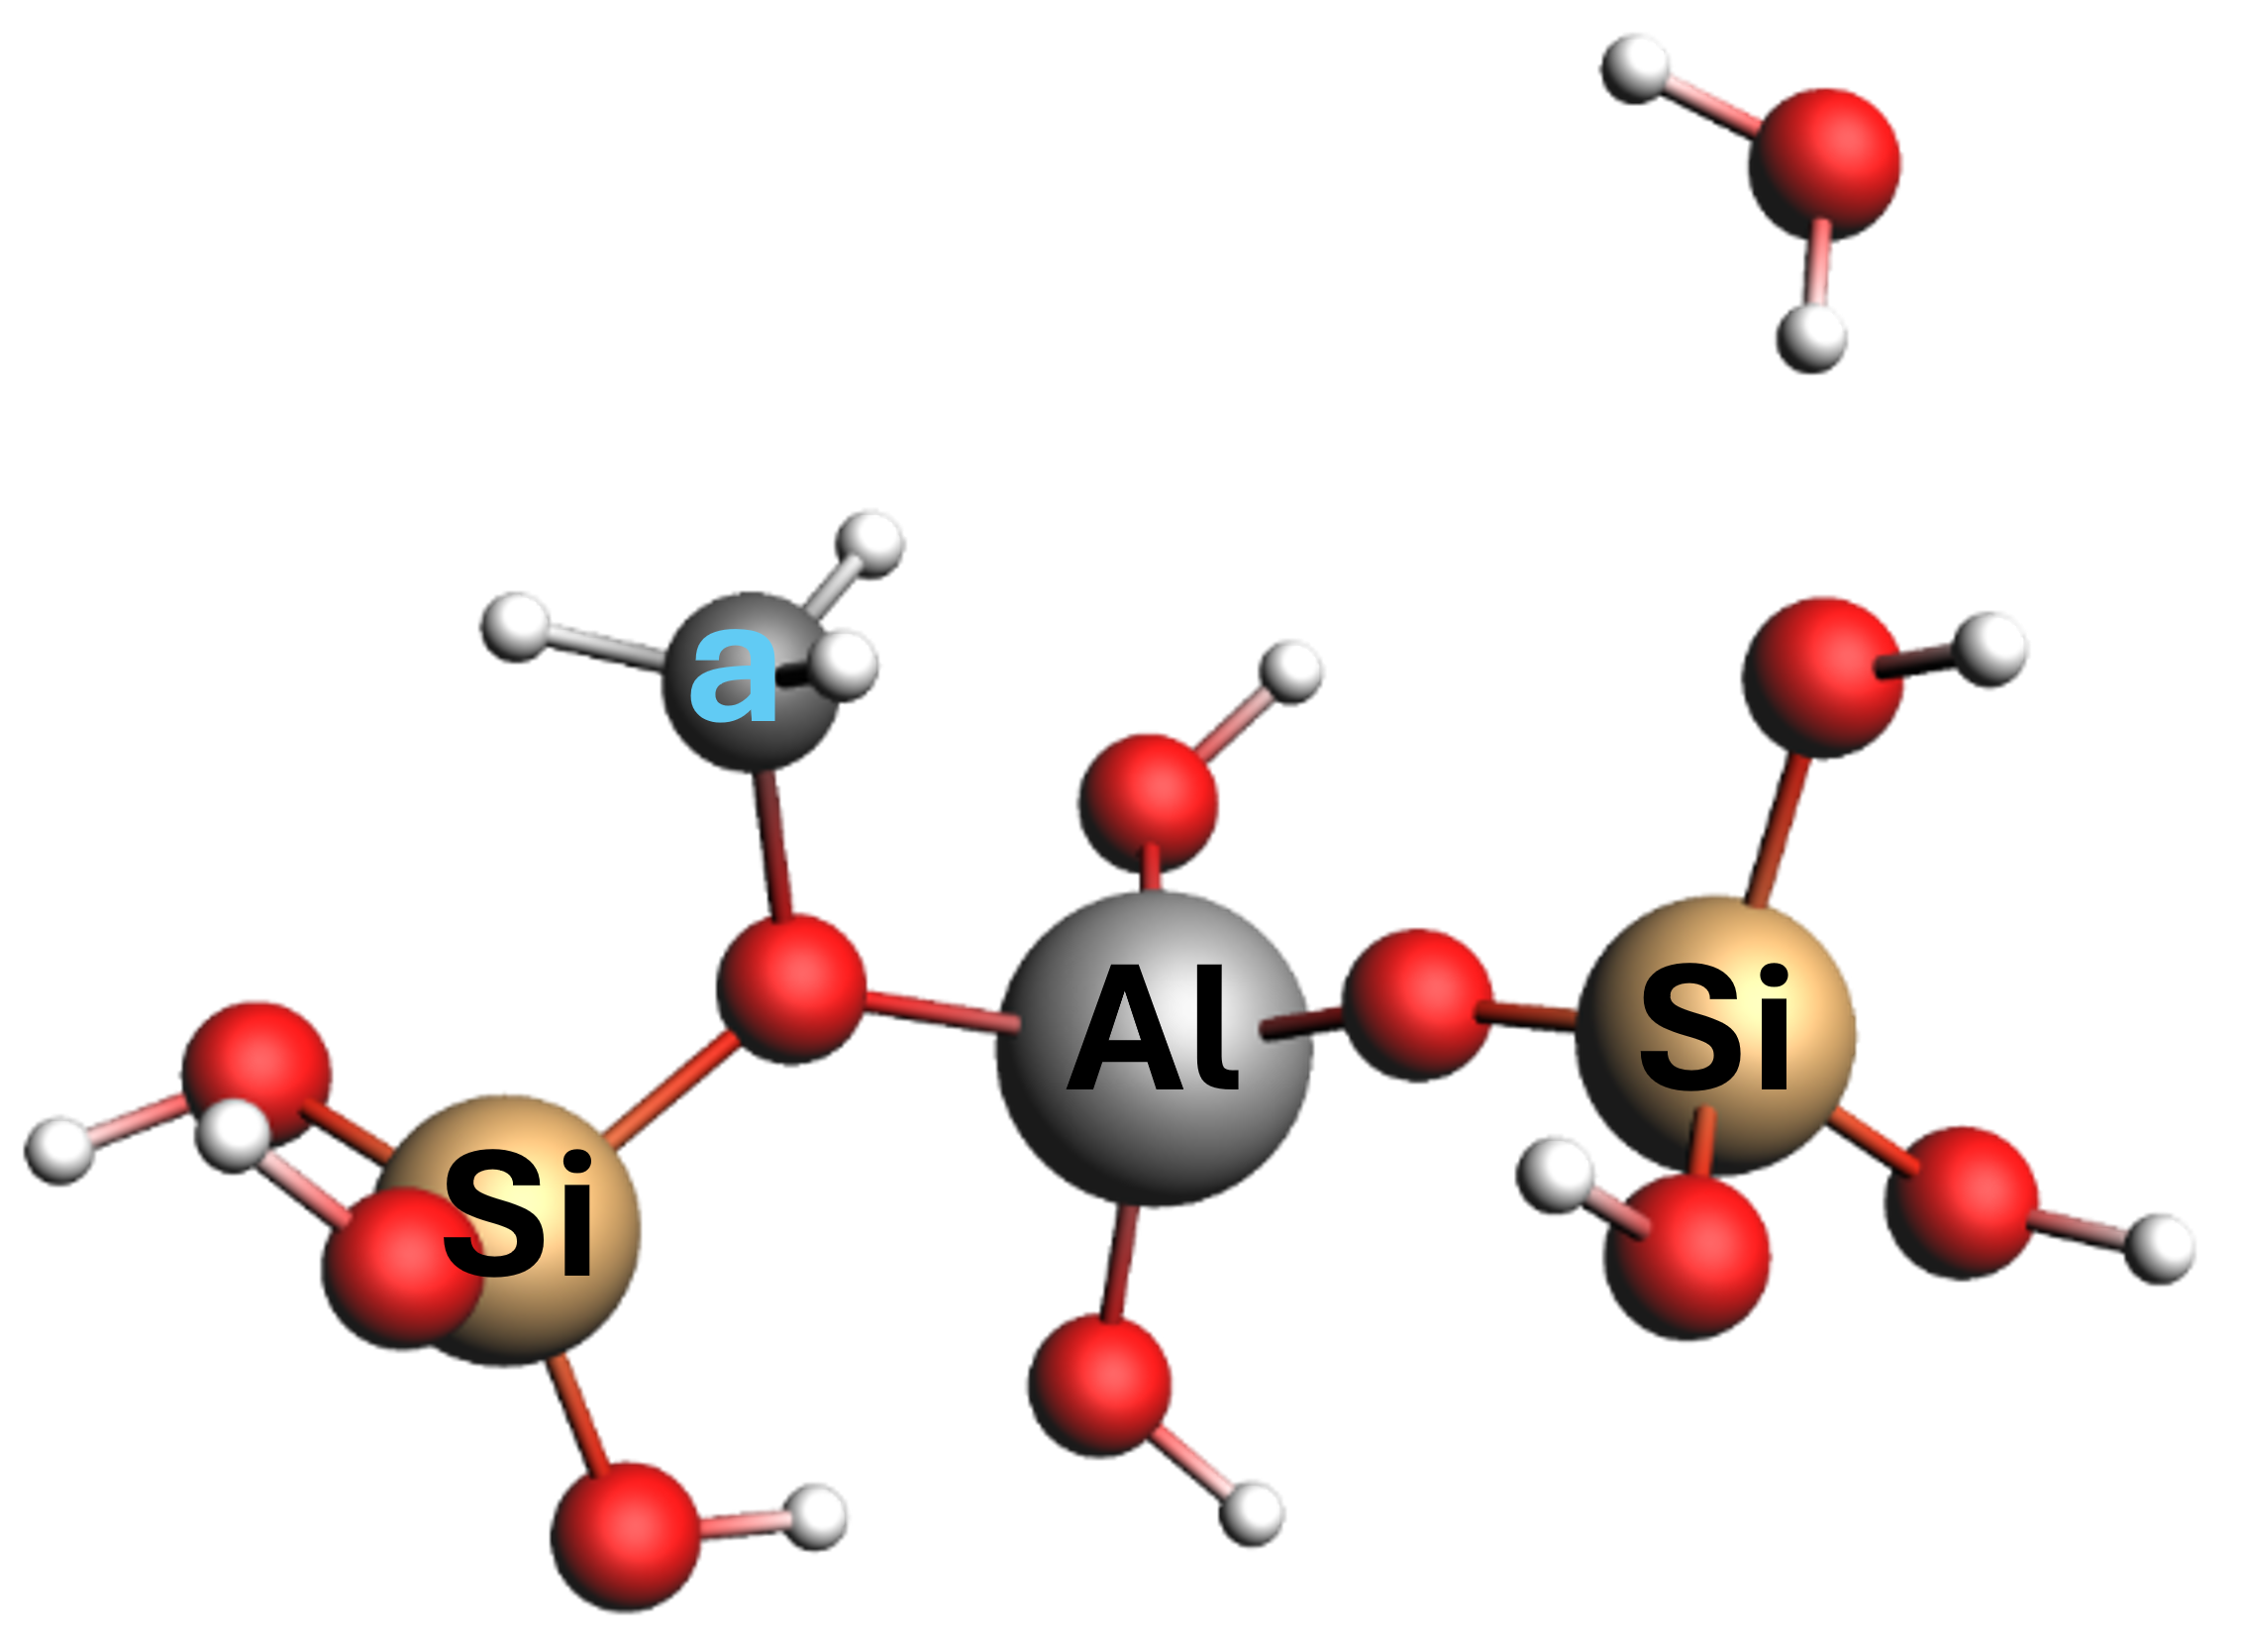  Methoxy bound at Brønsted acid site in Al-BEA  (with eliminated H2O molecule from CH3OH) | COSMO (Methanol)  a=54.6 |
| 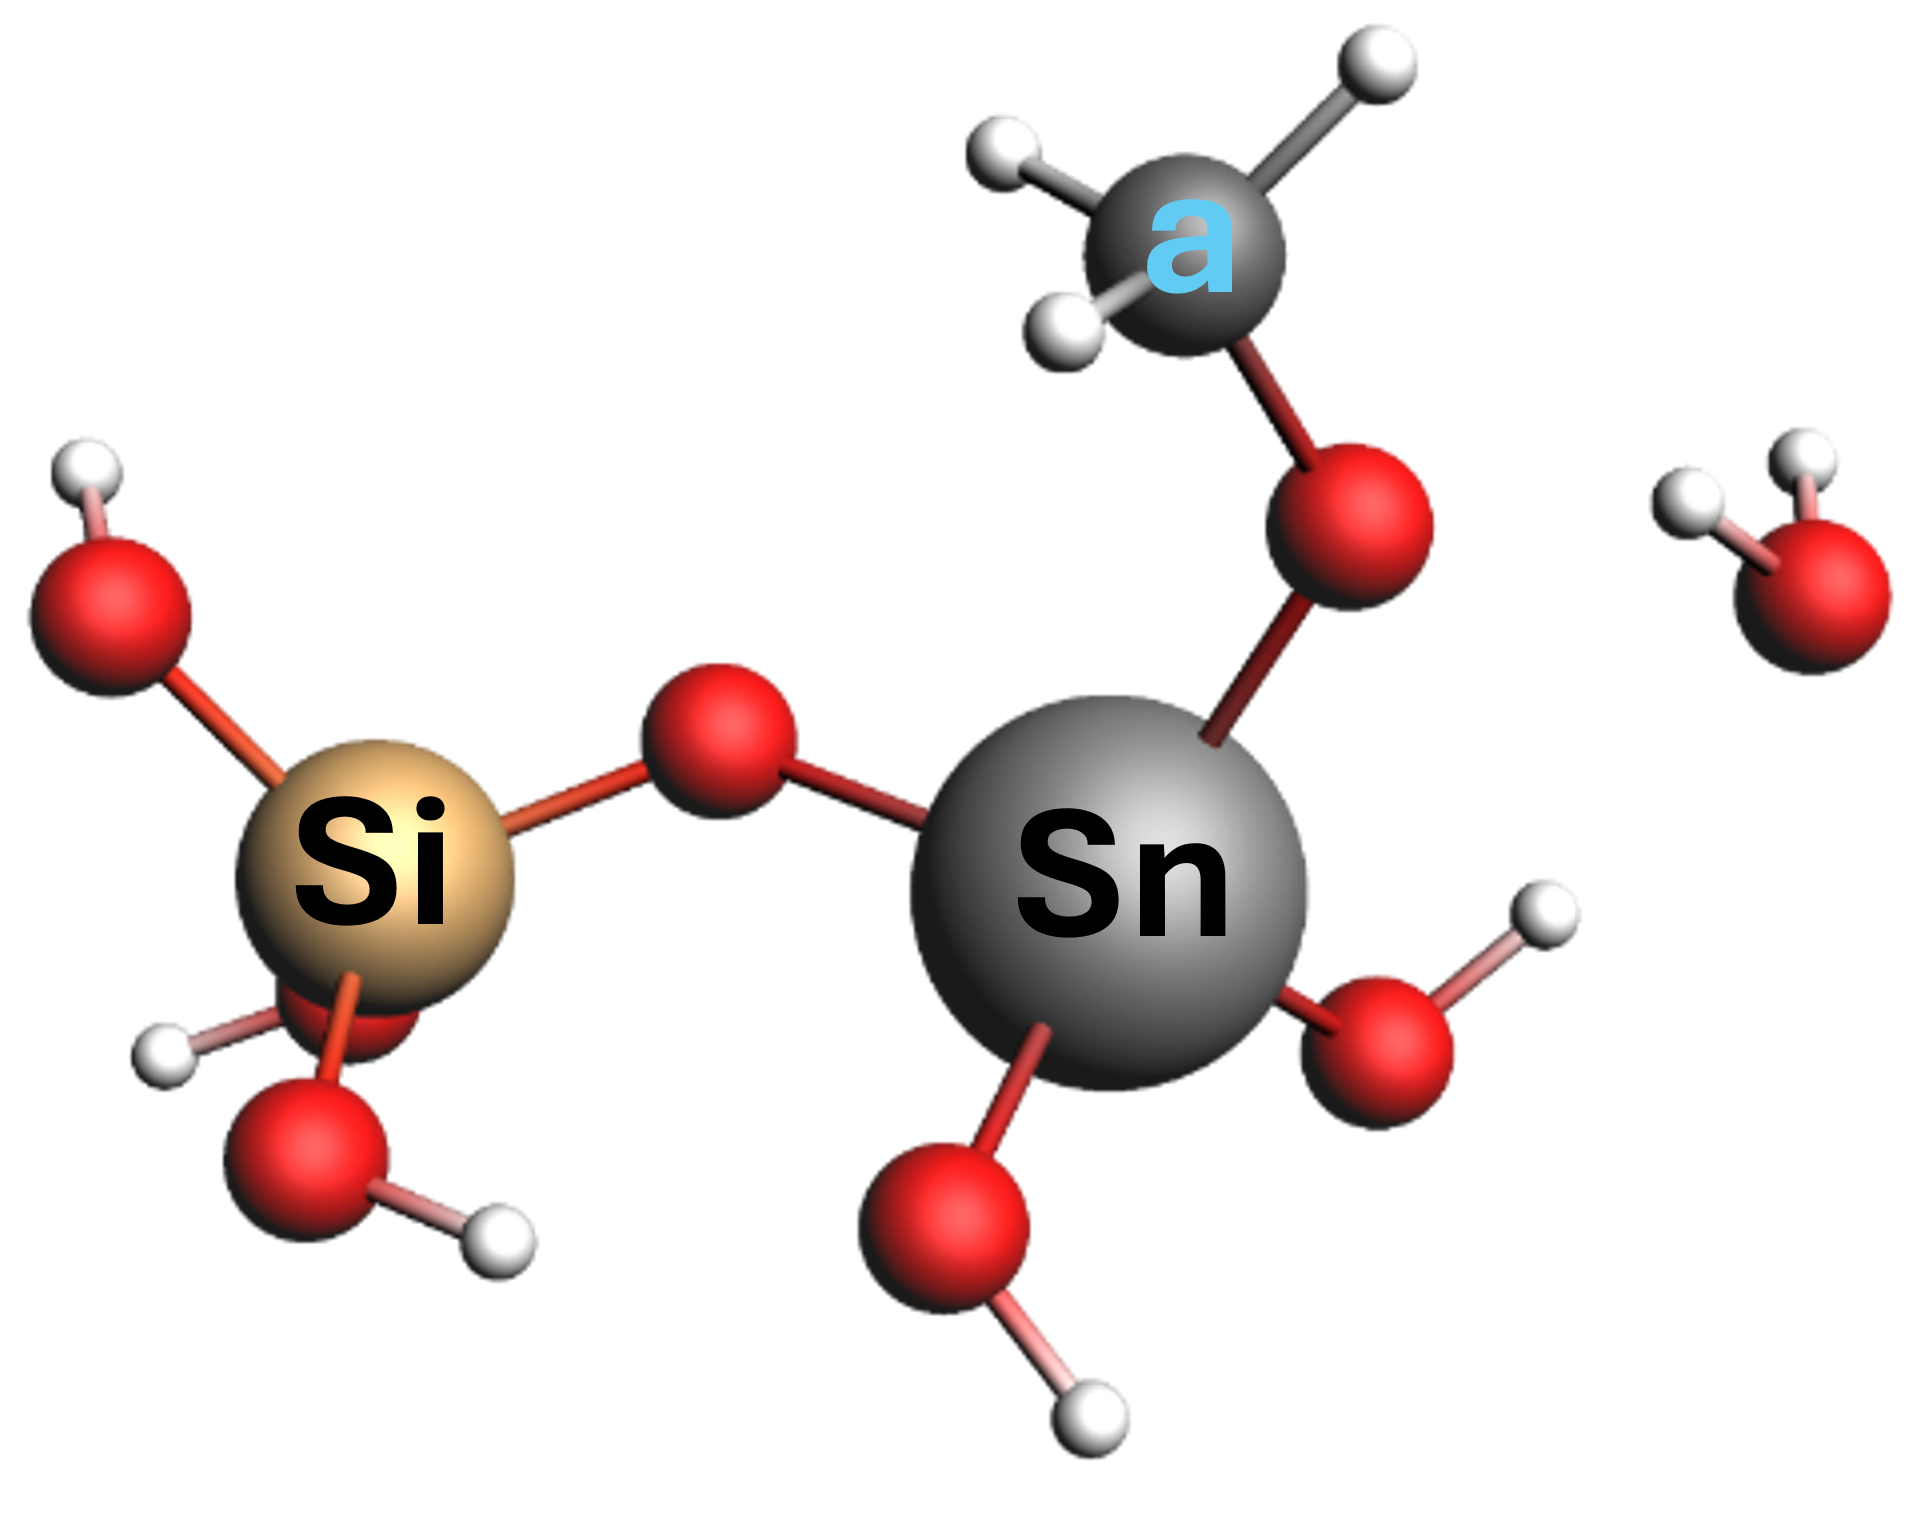  Methoxy bound to Sn site in Sn-BEA  (with eliminated H2O from CH3OH) | COSMO(methanol)  a=55.2 |
| 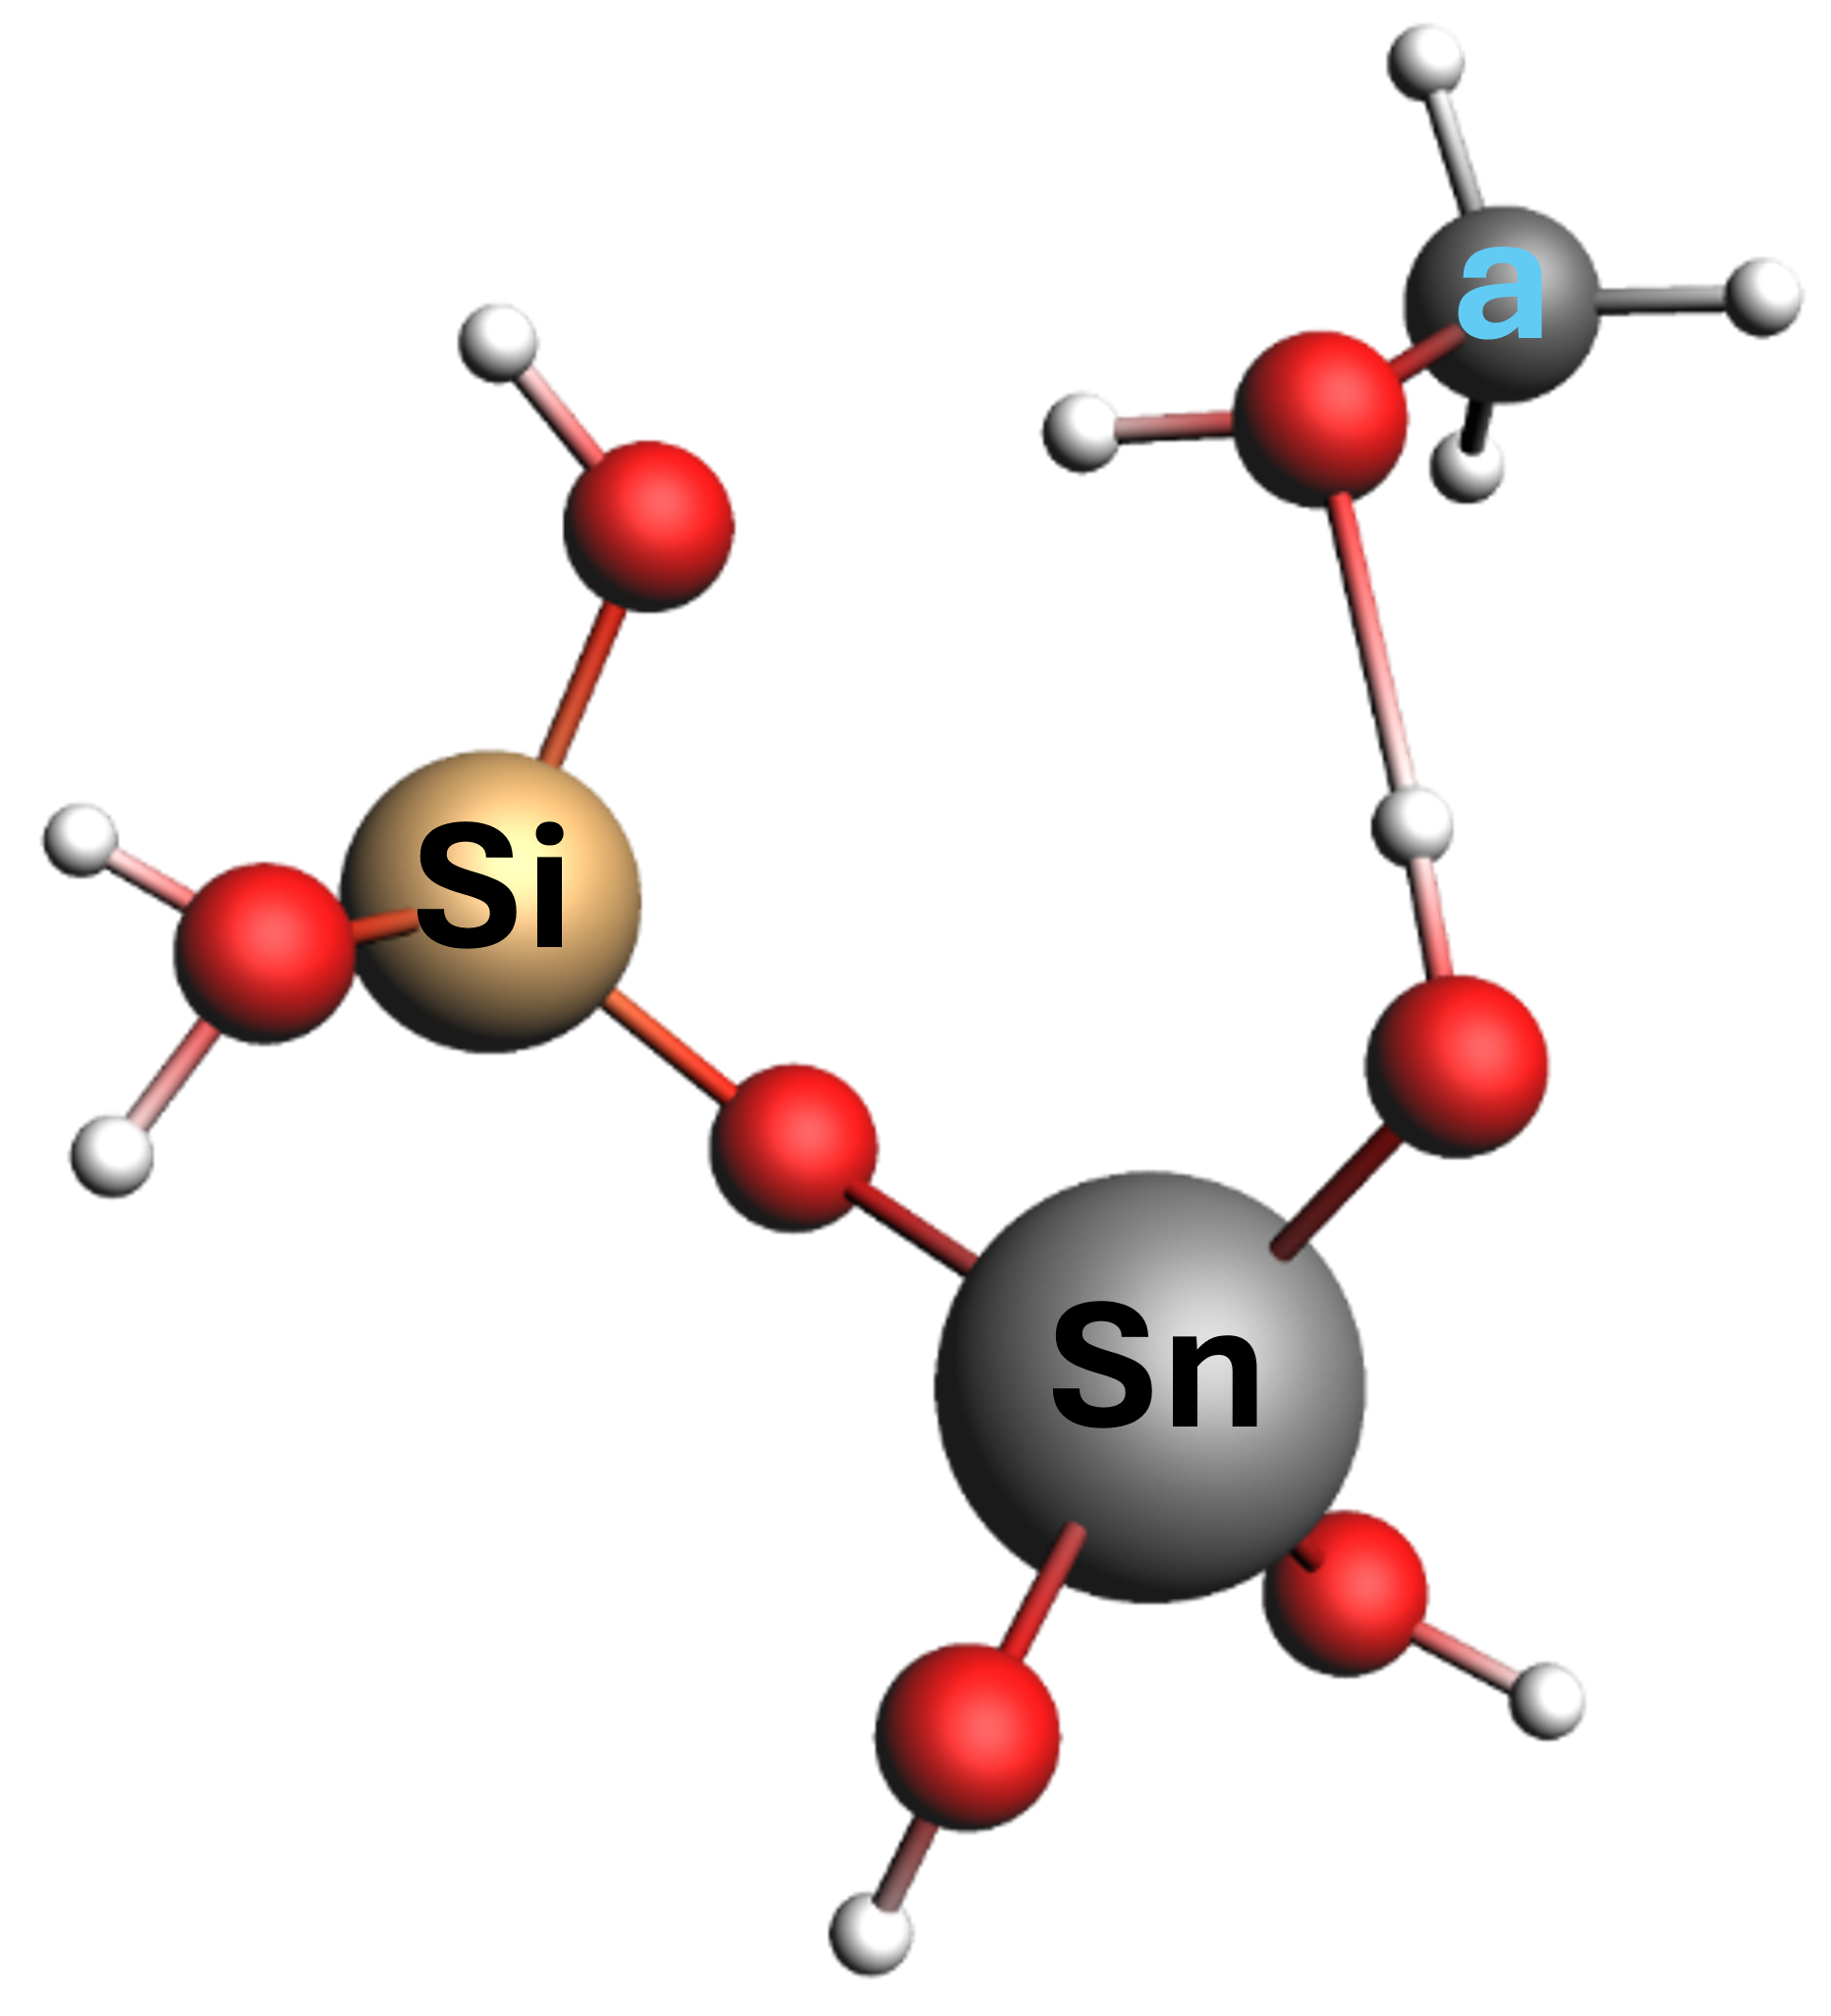  Methanol bound to -H at open site (Sn-OH) in Sn-BEA | COSMO(methanol)  a=47.9 |
| 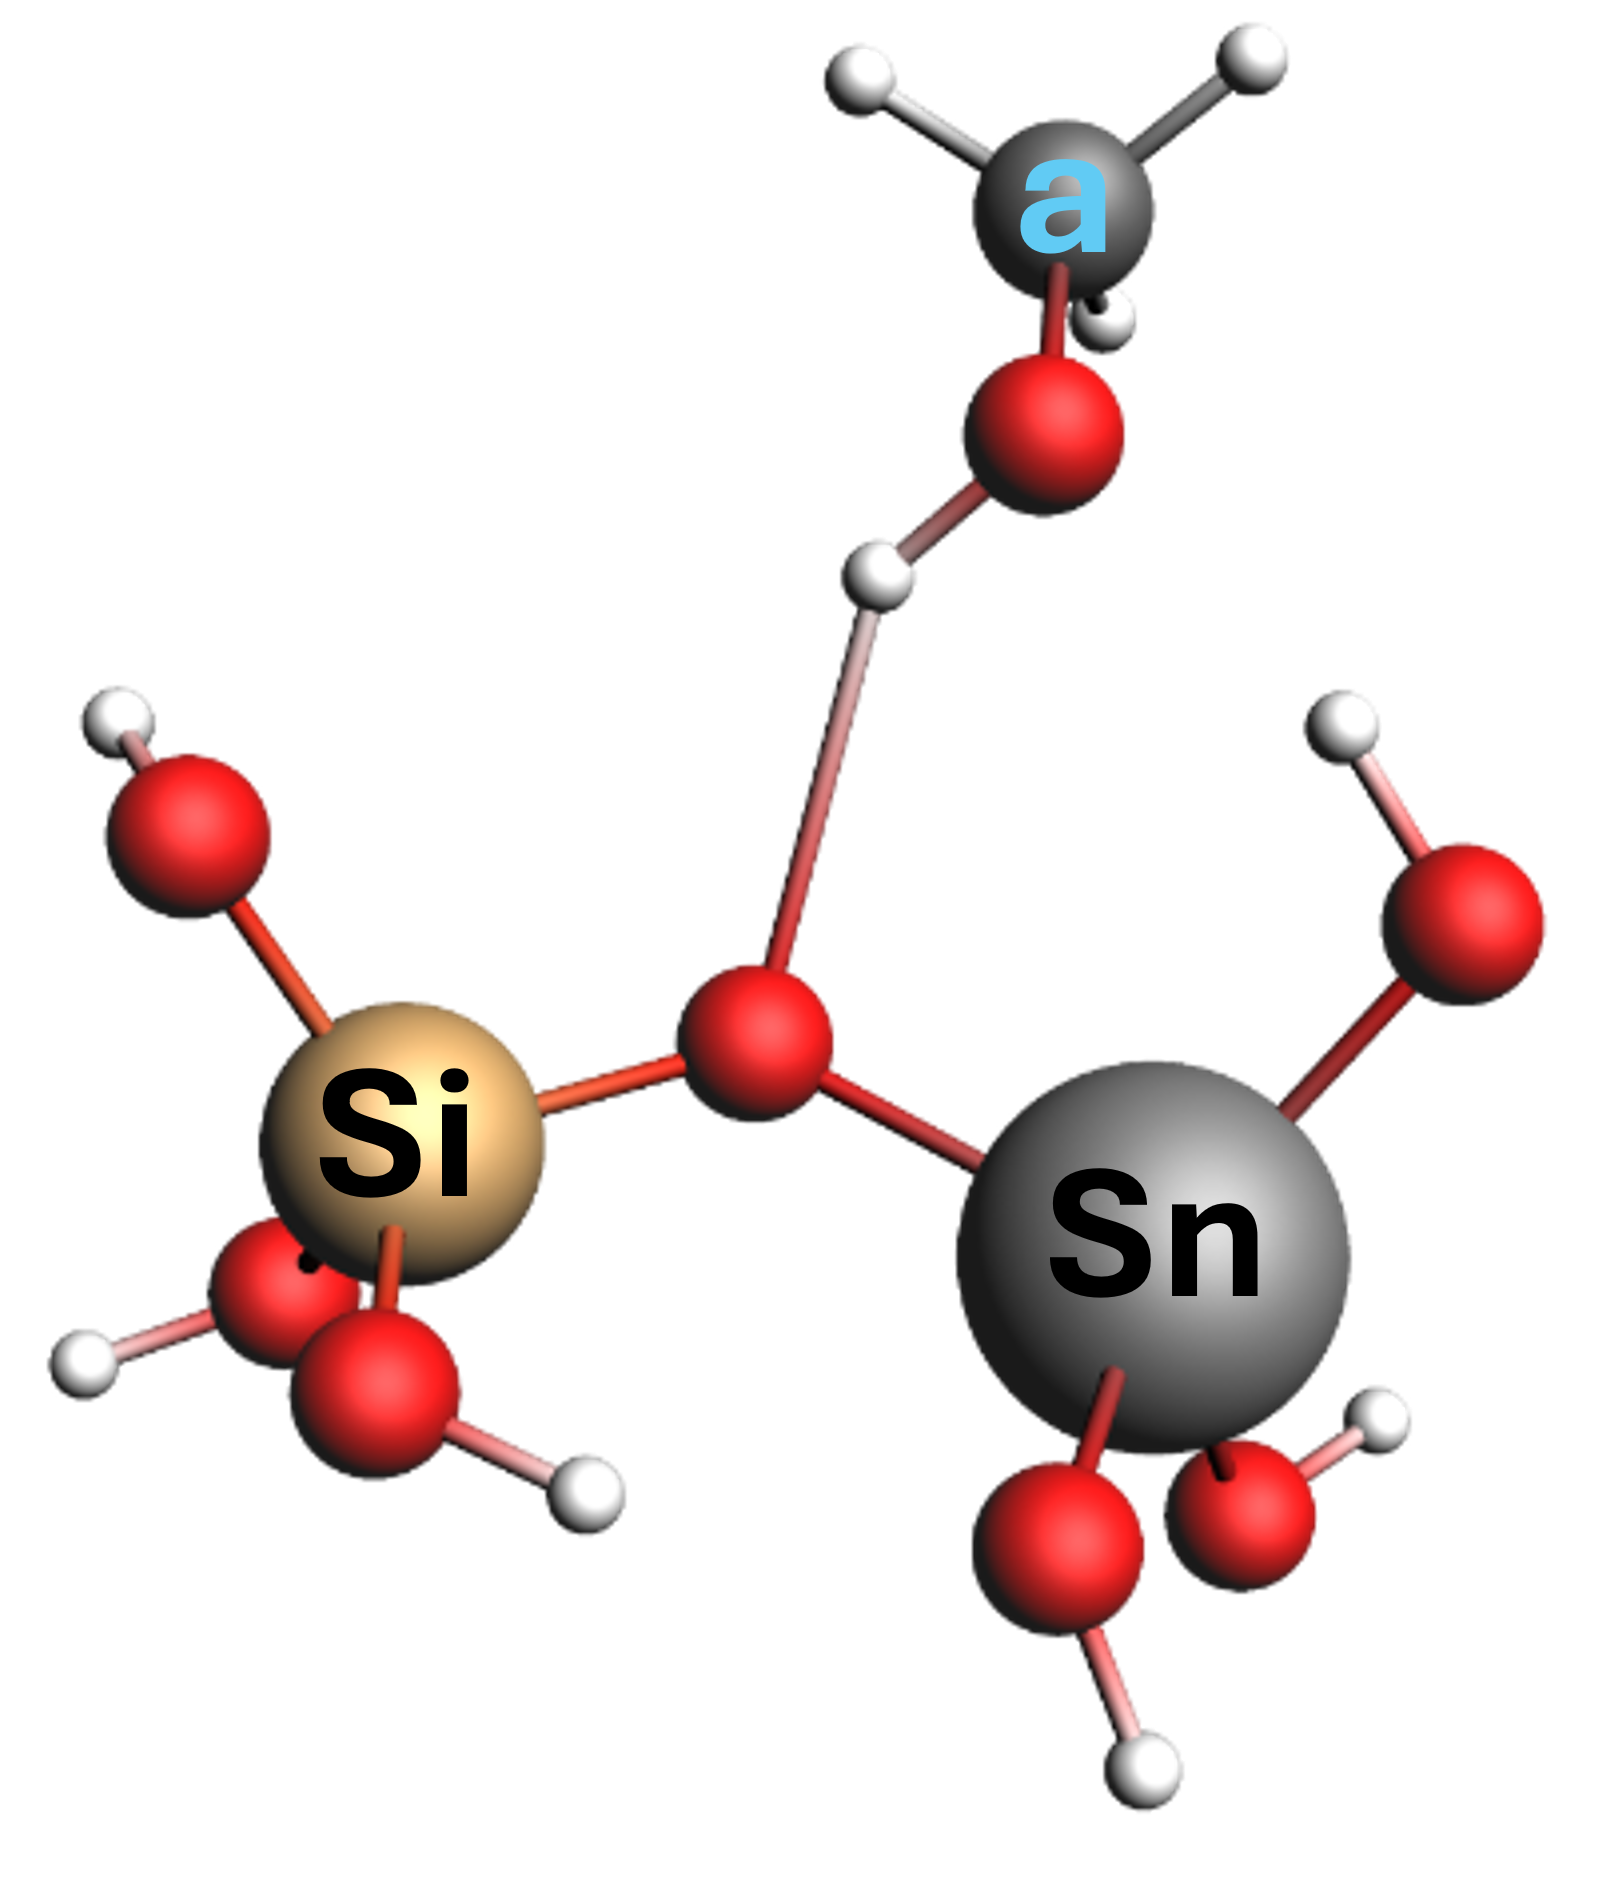Methanol bound to O in Sn-O-Si near open site (Sn-OH) in Sn-BEA | COSMO(methanol)  a=49.0 |
| 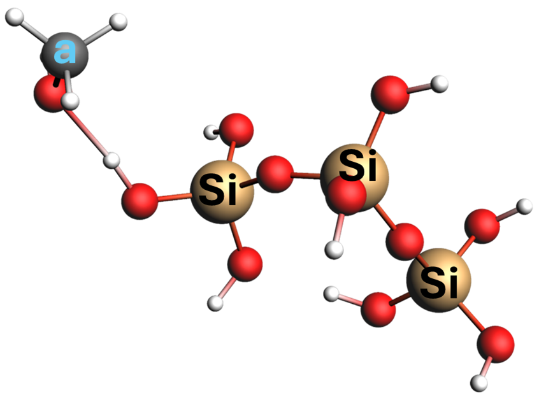Methanol bound at Si-OH | COSMO(methanol)  a=49.7  H (methanol)-O (Si-O-Si) bond length = 4.478 Å  Methanol unlikely to bind to this site  O (methanol)-H (Si-O-H) bond length = 1.714 Å  Methanol likely binds to this site |
| 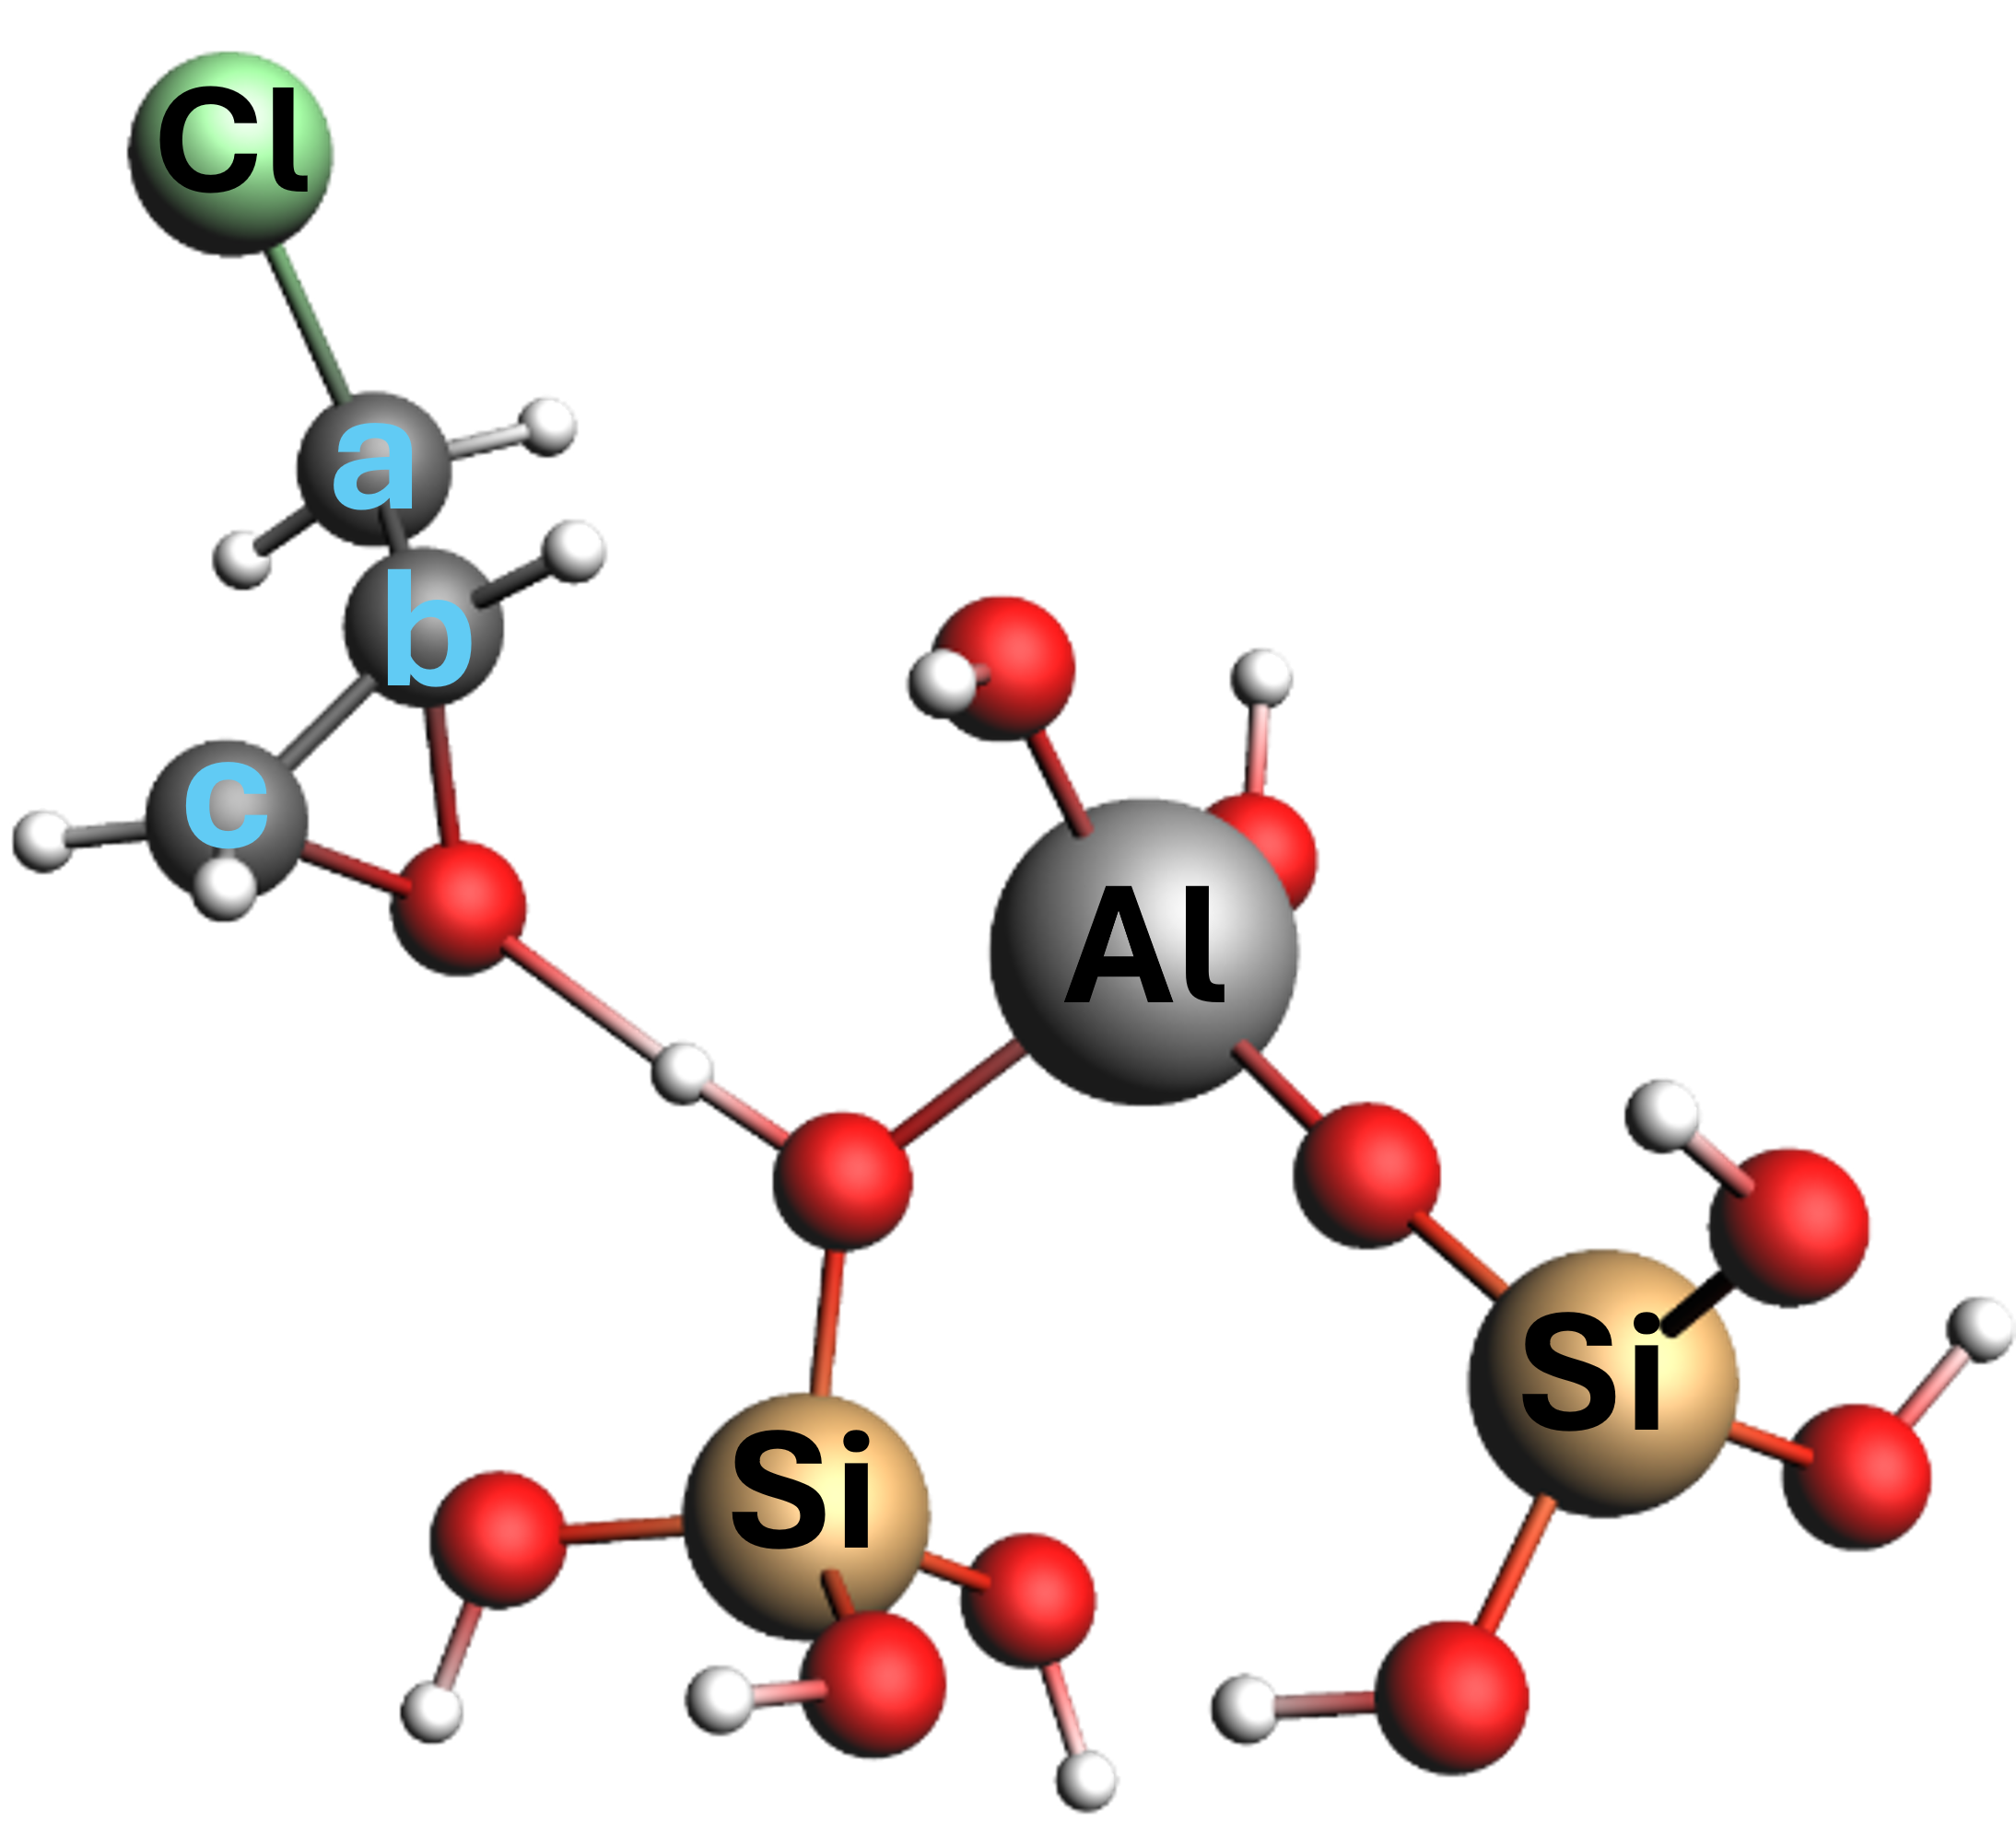Epichlorohydrin bound at Brønsted acid site in Al-BEA | COSMO(methanol)  a=49.5  b=55.7  c=51.1  BA-H to O of ECH bond length =1.567 Å  BA-H to O of BAS bond length =1.033 Å |
| 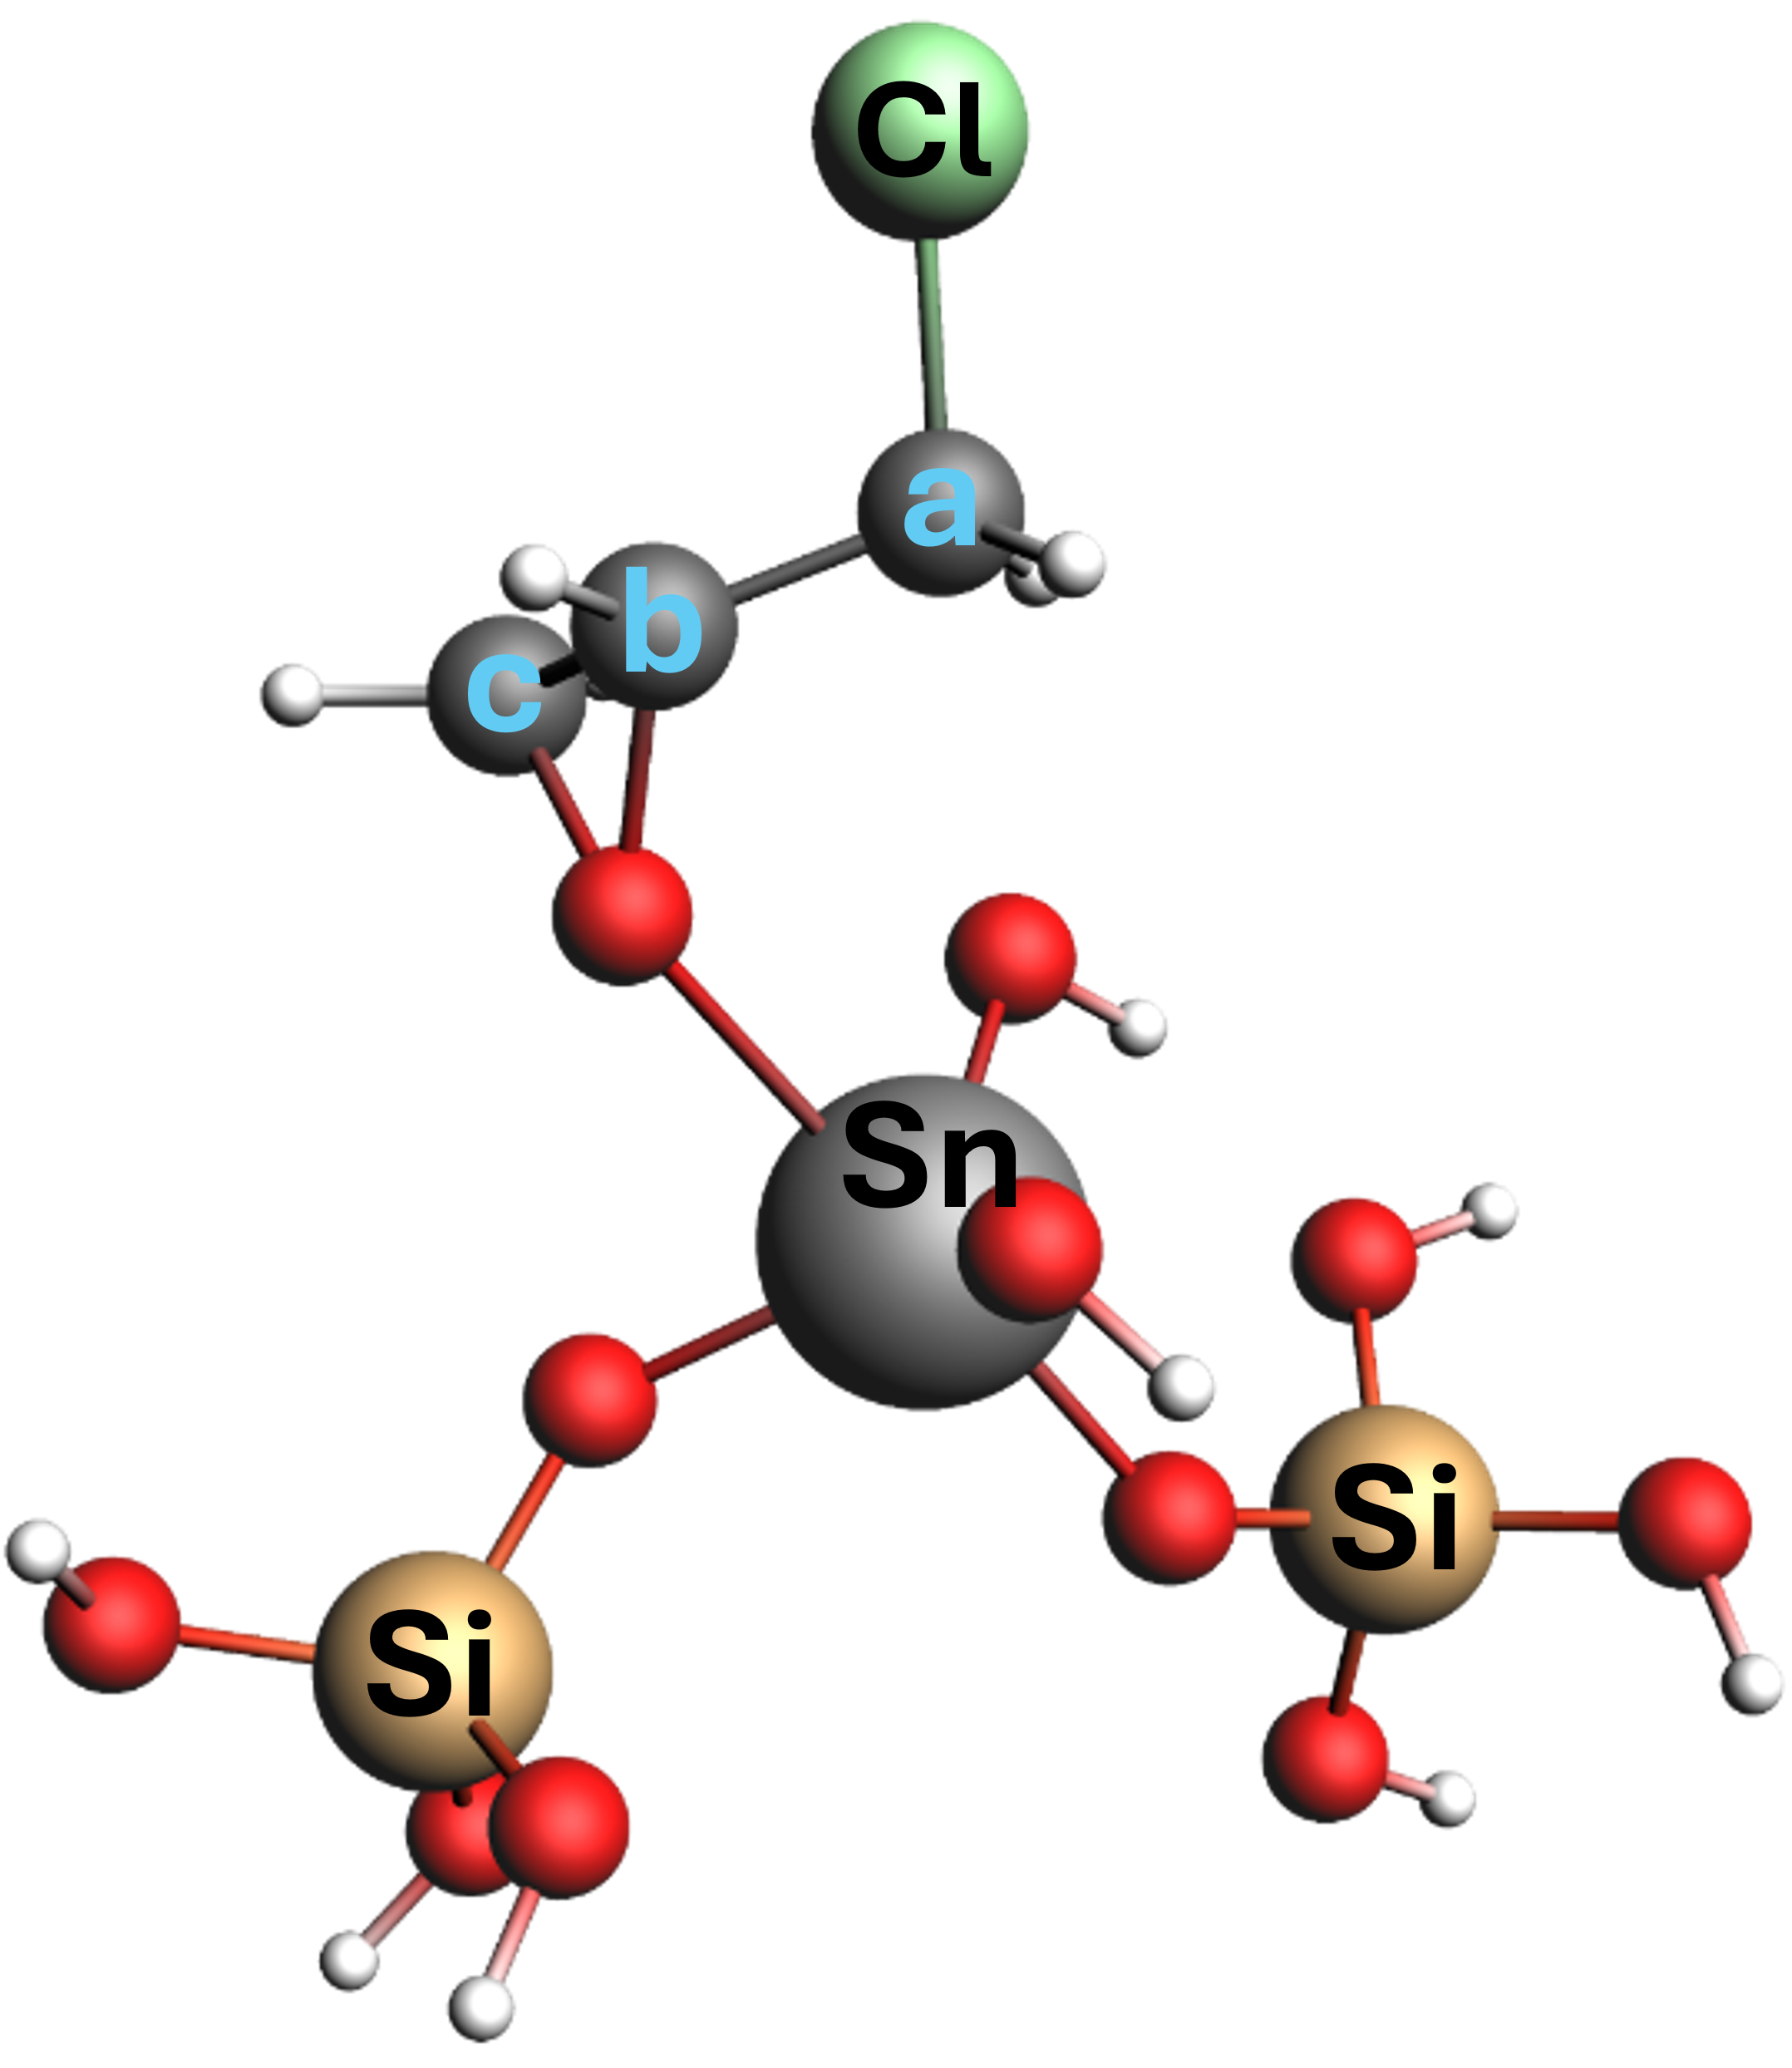  Epichlorohydrin bound at Sn site in Sn-BEA | COSMO(methanol)  a=48.5  b=58.9  c=53.5  O (ECH)-Sn bond length = 2.398 Å |
| Protonated CH3OH at Brønsted acid site, Al-BEA 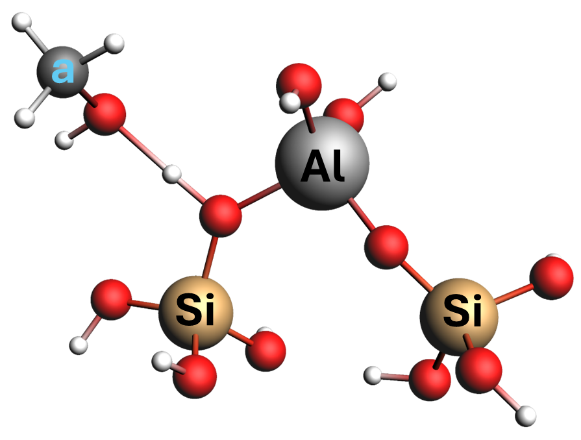 | COSMO(methanol)  a=50.2  O (methanol)-H (BAS) bond length = 1.492 Å  H-O (BAS) bond length = 1.055 Å  *Note that the predicted structure for protonated CH3OH has a nearly identical structure to un-protonated CH3OH bound to Brønsted acid sites, but with a slightly shorter bond between CH3OH and the proton and a 0.6 ppm 13C shift downfield. |
| 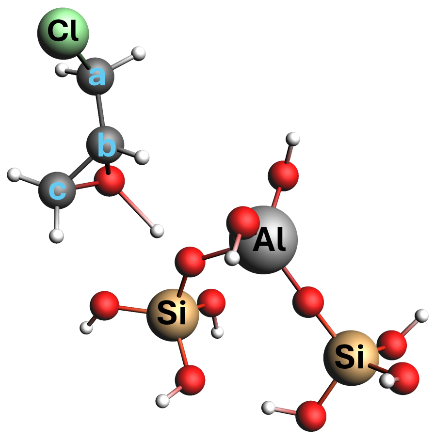  Protonated ECH at Brønsted acid site, Al-BEA | COSMO(methanol)  a=49.1  b=55.5  c=51.0  O (ECH)-H (BAS) bond length = 1.567 Å  H-O (BAS) bond length = 1.034 Å  *Note that the predicted structure for protonated ECH has nearly identical bond lengths and predicted peak shifts to un-protonated ECH bound to Brønsted acid sites. |
| 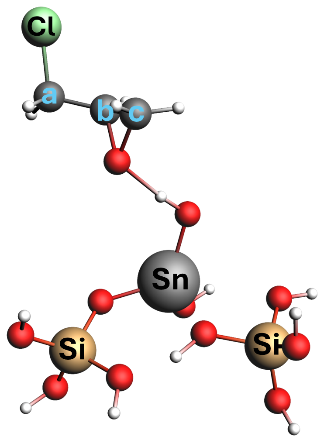  Protonated ECH at Sn-OH site, Sn-BEA | COSMO(methanol)  a=50.4  b=54.0  c=50.2  O (ECH)-H (Sn-OH) bond length = 1.697 Å  H-O (Sn-OH) bond length = 1.007 Å  *Note that the predicted structure for protonated ECH at Sn-OH has a significantly shorter bond length (1.697 Å) than for un-protonated ECH bound to Sn atoms (2.398 Å). |
| 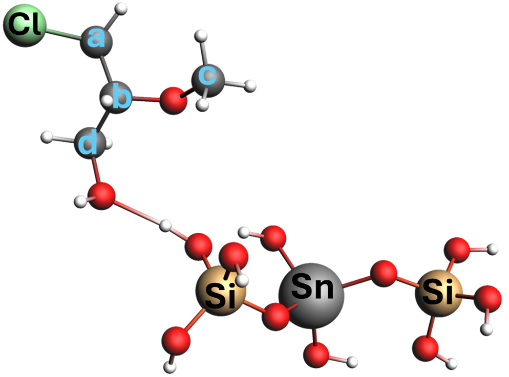  Terminal alcohol bound at Sn site, Sn-BEA | COSMO(methanol)  a=44.6  b=87.2  c=55.5  d=65.6  O (TA, -OCH3)-Sn bond length = 6.202 Å  TA unlikely to bind to this site  O (TA, -OH)-H(Si-O-H) bond length = 1.732 Å  TA likely binds to this site |
| 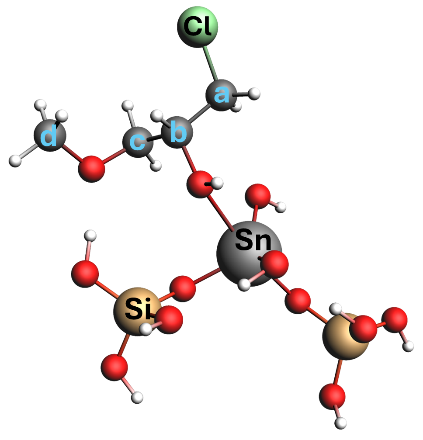  Terminal ether bound at Sn site, Sn-BEA | COSMO(methanol)  a=47.3  b=76.5  c=71.6  d=54.2  O (TE)-Sn bond length = 2.481 Å |

**Table S9**. Predicted 13C NMR peak shifts for reactants, primary products, and intermediates from the ring-opening of C3H5ClO with CH3OH, when adsorbed to Al-BEA and Sn-BEA acid sites. These peak shifts were predicted by the Amsterdam Density Functional package (ADF 2024).

The DFT calculations over Sn-BEA consider relativistic effects, while the calculations over Al-BEA do not. The heaviness of Sn atoms (118.71 amu) requires the consideration of relativistic effects for the DFT calculations to run properly.56 However, Al atoms (26.98 amu) do not suffer from such limitations, as the DFT software predicts approximately identical peak shifts with and without relativistic effects included. We therefore ran the DFT calculations of Al-BEA without relativistic effects for simplicity.

| **Molecule** | **NO COSMO** Shift (ppm) | **COSMO in Acetonitrile** Shift (ppm) | **COSMO in Methanol** Shift (ppm) |
| --- | --- | --- | --- |
| 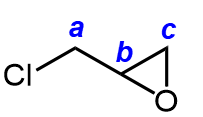Epichlorohydrin | a = 50.26  b = 50.62  c = 45.20 | a = 51.76  b = 51.84  c = 47.54 | a = 51.77  b = 51.85  c = 47.56 |
| 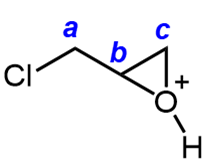  Protonated Epichlorohydrin | -- | a = 43.0  b = 82.8  c = 74.6  b-O bond: 1.591 Å  c-O bond: 1.545 Å  O-H bond: 0.986 Å | a = 43.0  b = 82.9  c = 74.6  b-O bond: 1.591 Å  c-O bond: 1.545 Å  O-H bond: 0.986 Å |
| 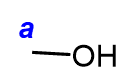    Methanol | -- | a = 49.56 | a = 49.6 |
| 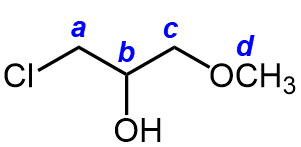Terminal ether | -- | a = 54.5  b = 77.9  c = 75.9  d = 55.8 | a = 54.5  b = 77.9  c = 75.9  d = 55.8 |
| 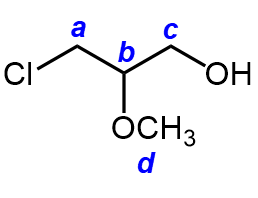Terminal alcohol | -- | a = 52.3  b = 85.7  c = 68.5  d = 59.1 | a = 52.3  b = 85.7  c = 68.5  d = 59.1 |
| 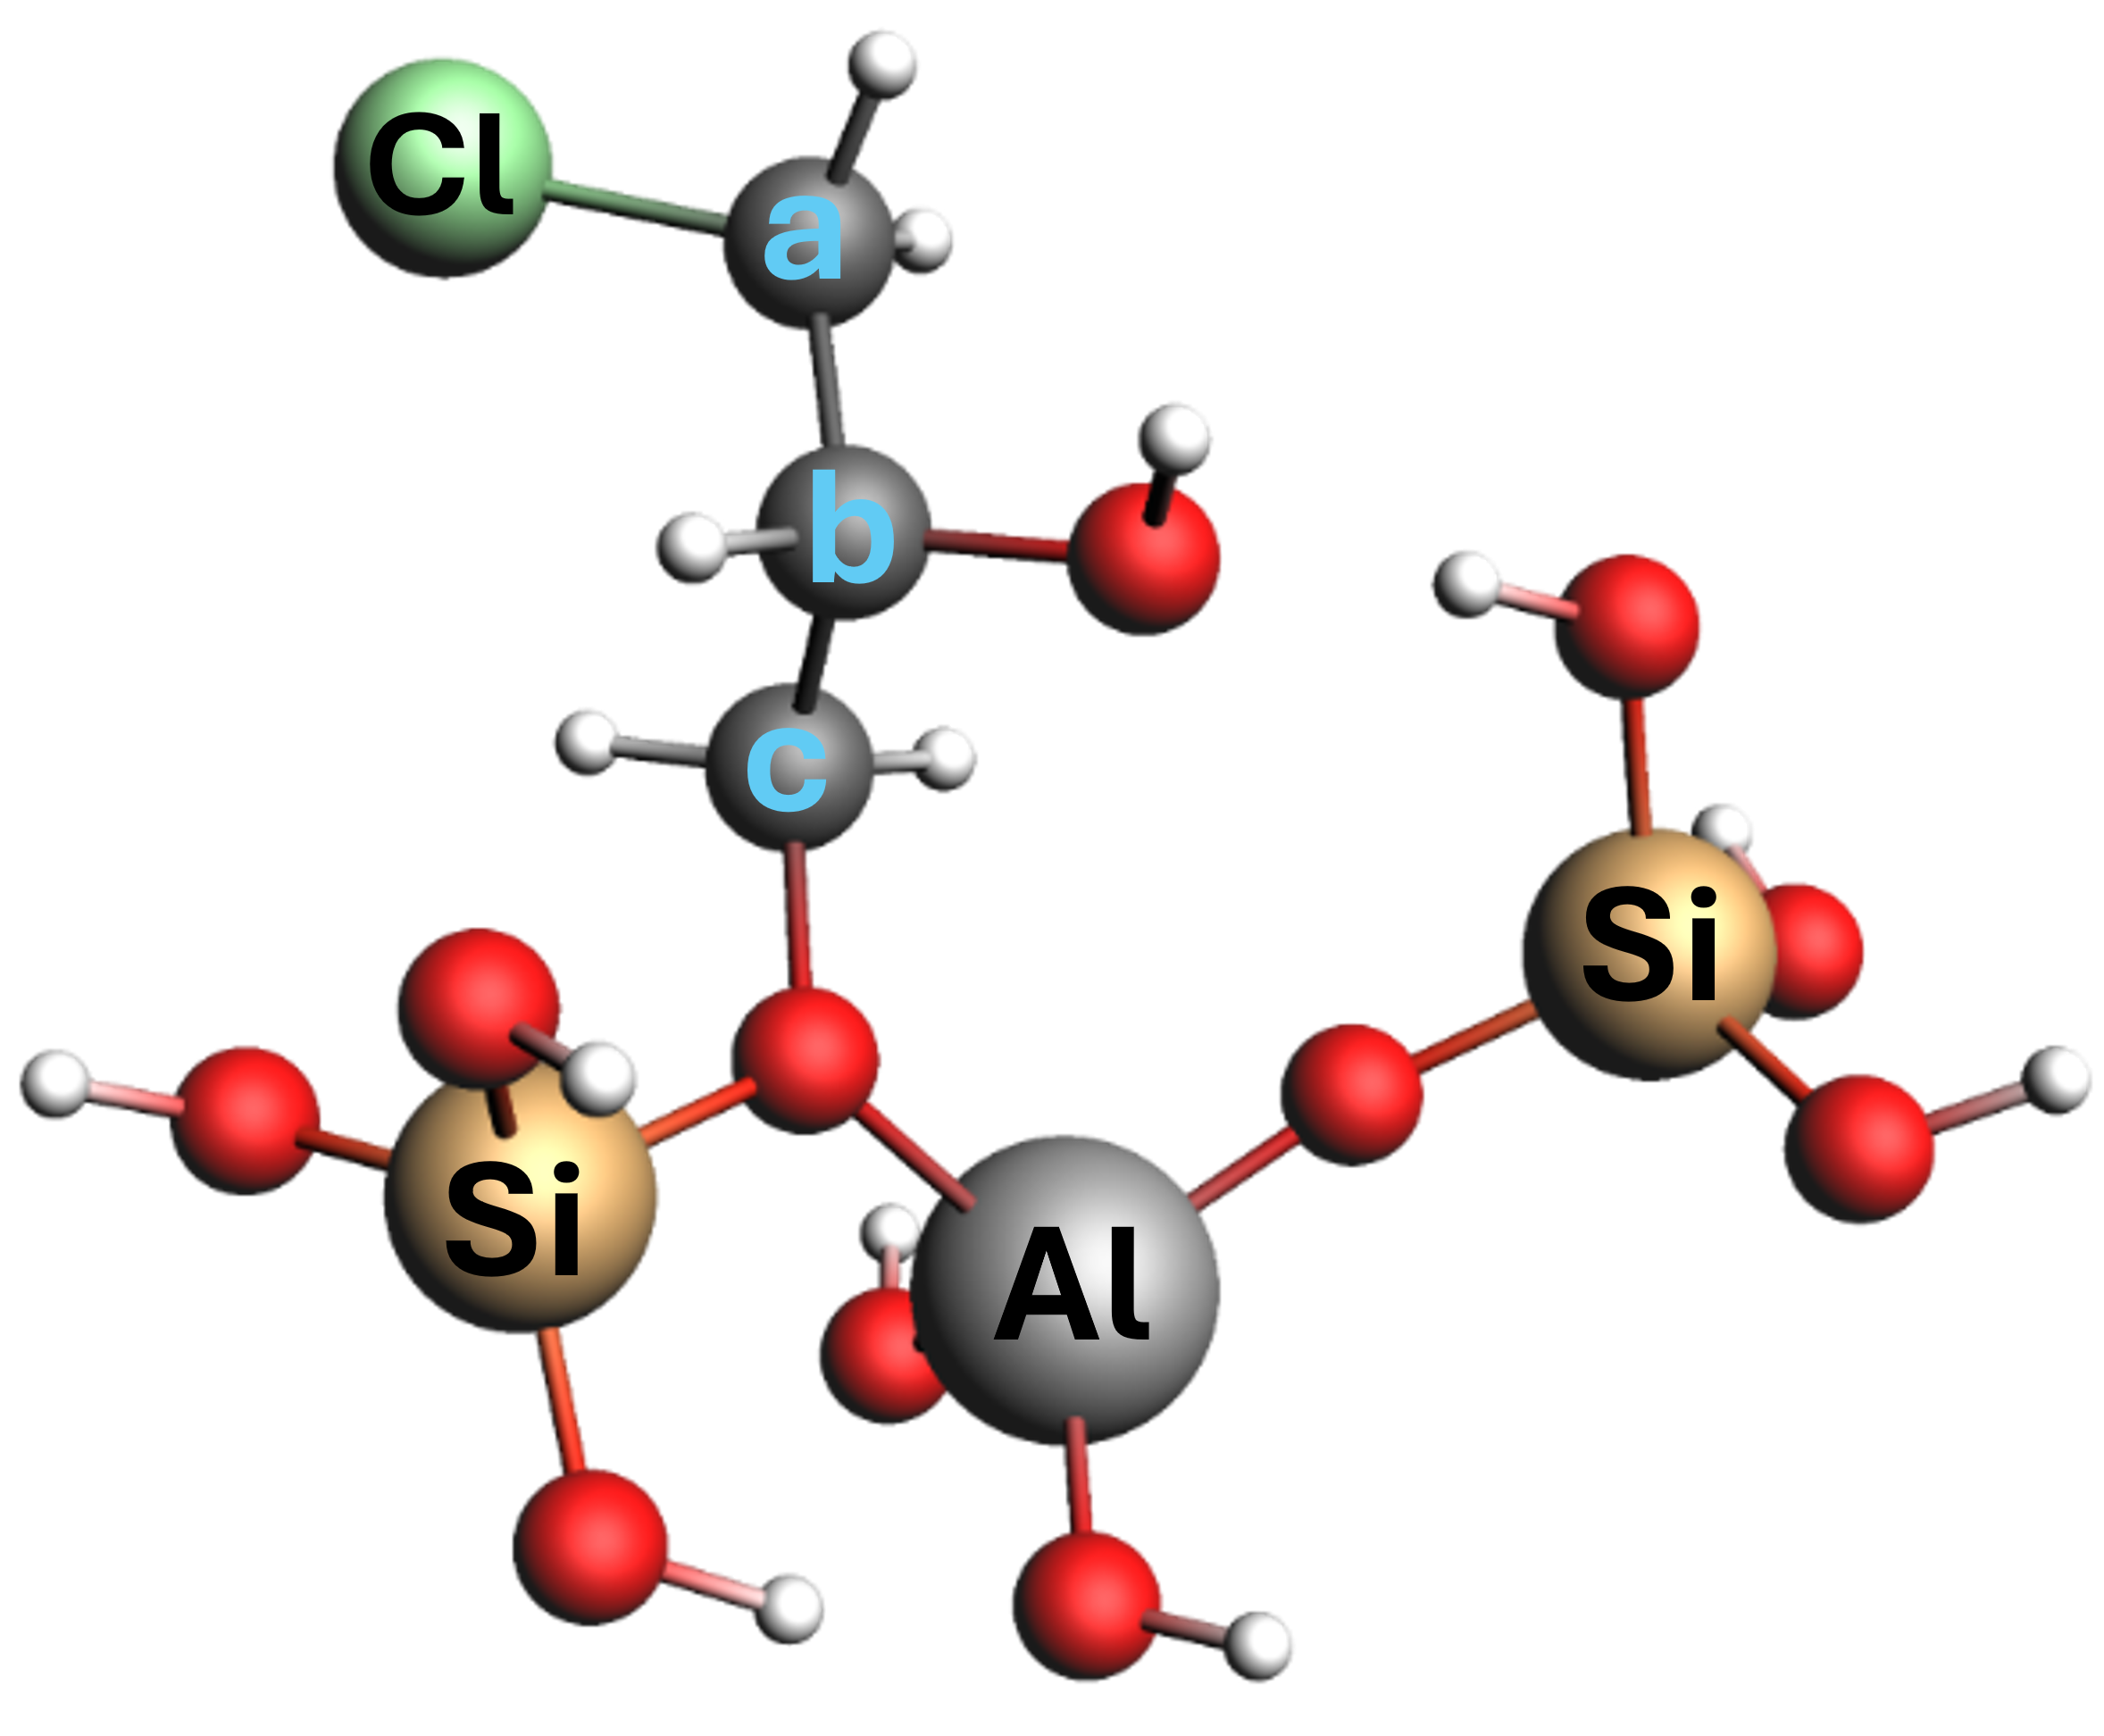  Primary carbocation (bound to Brønsted acid site, Al-BEA) | -- | a=46.8  b=75.1  c=71.2 | a=47.0  b=74.6  c=71.1 |
| 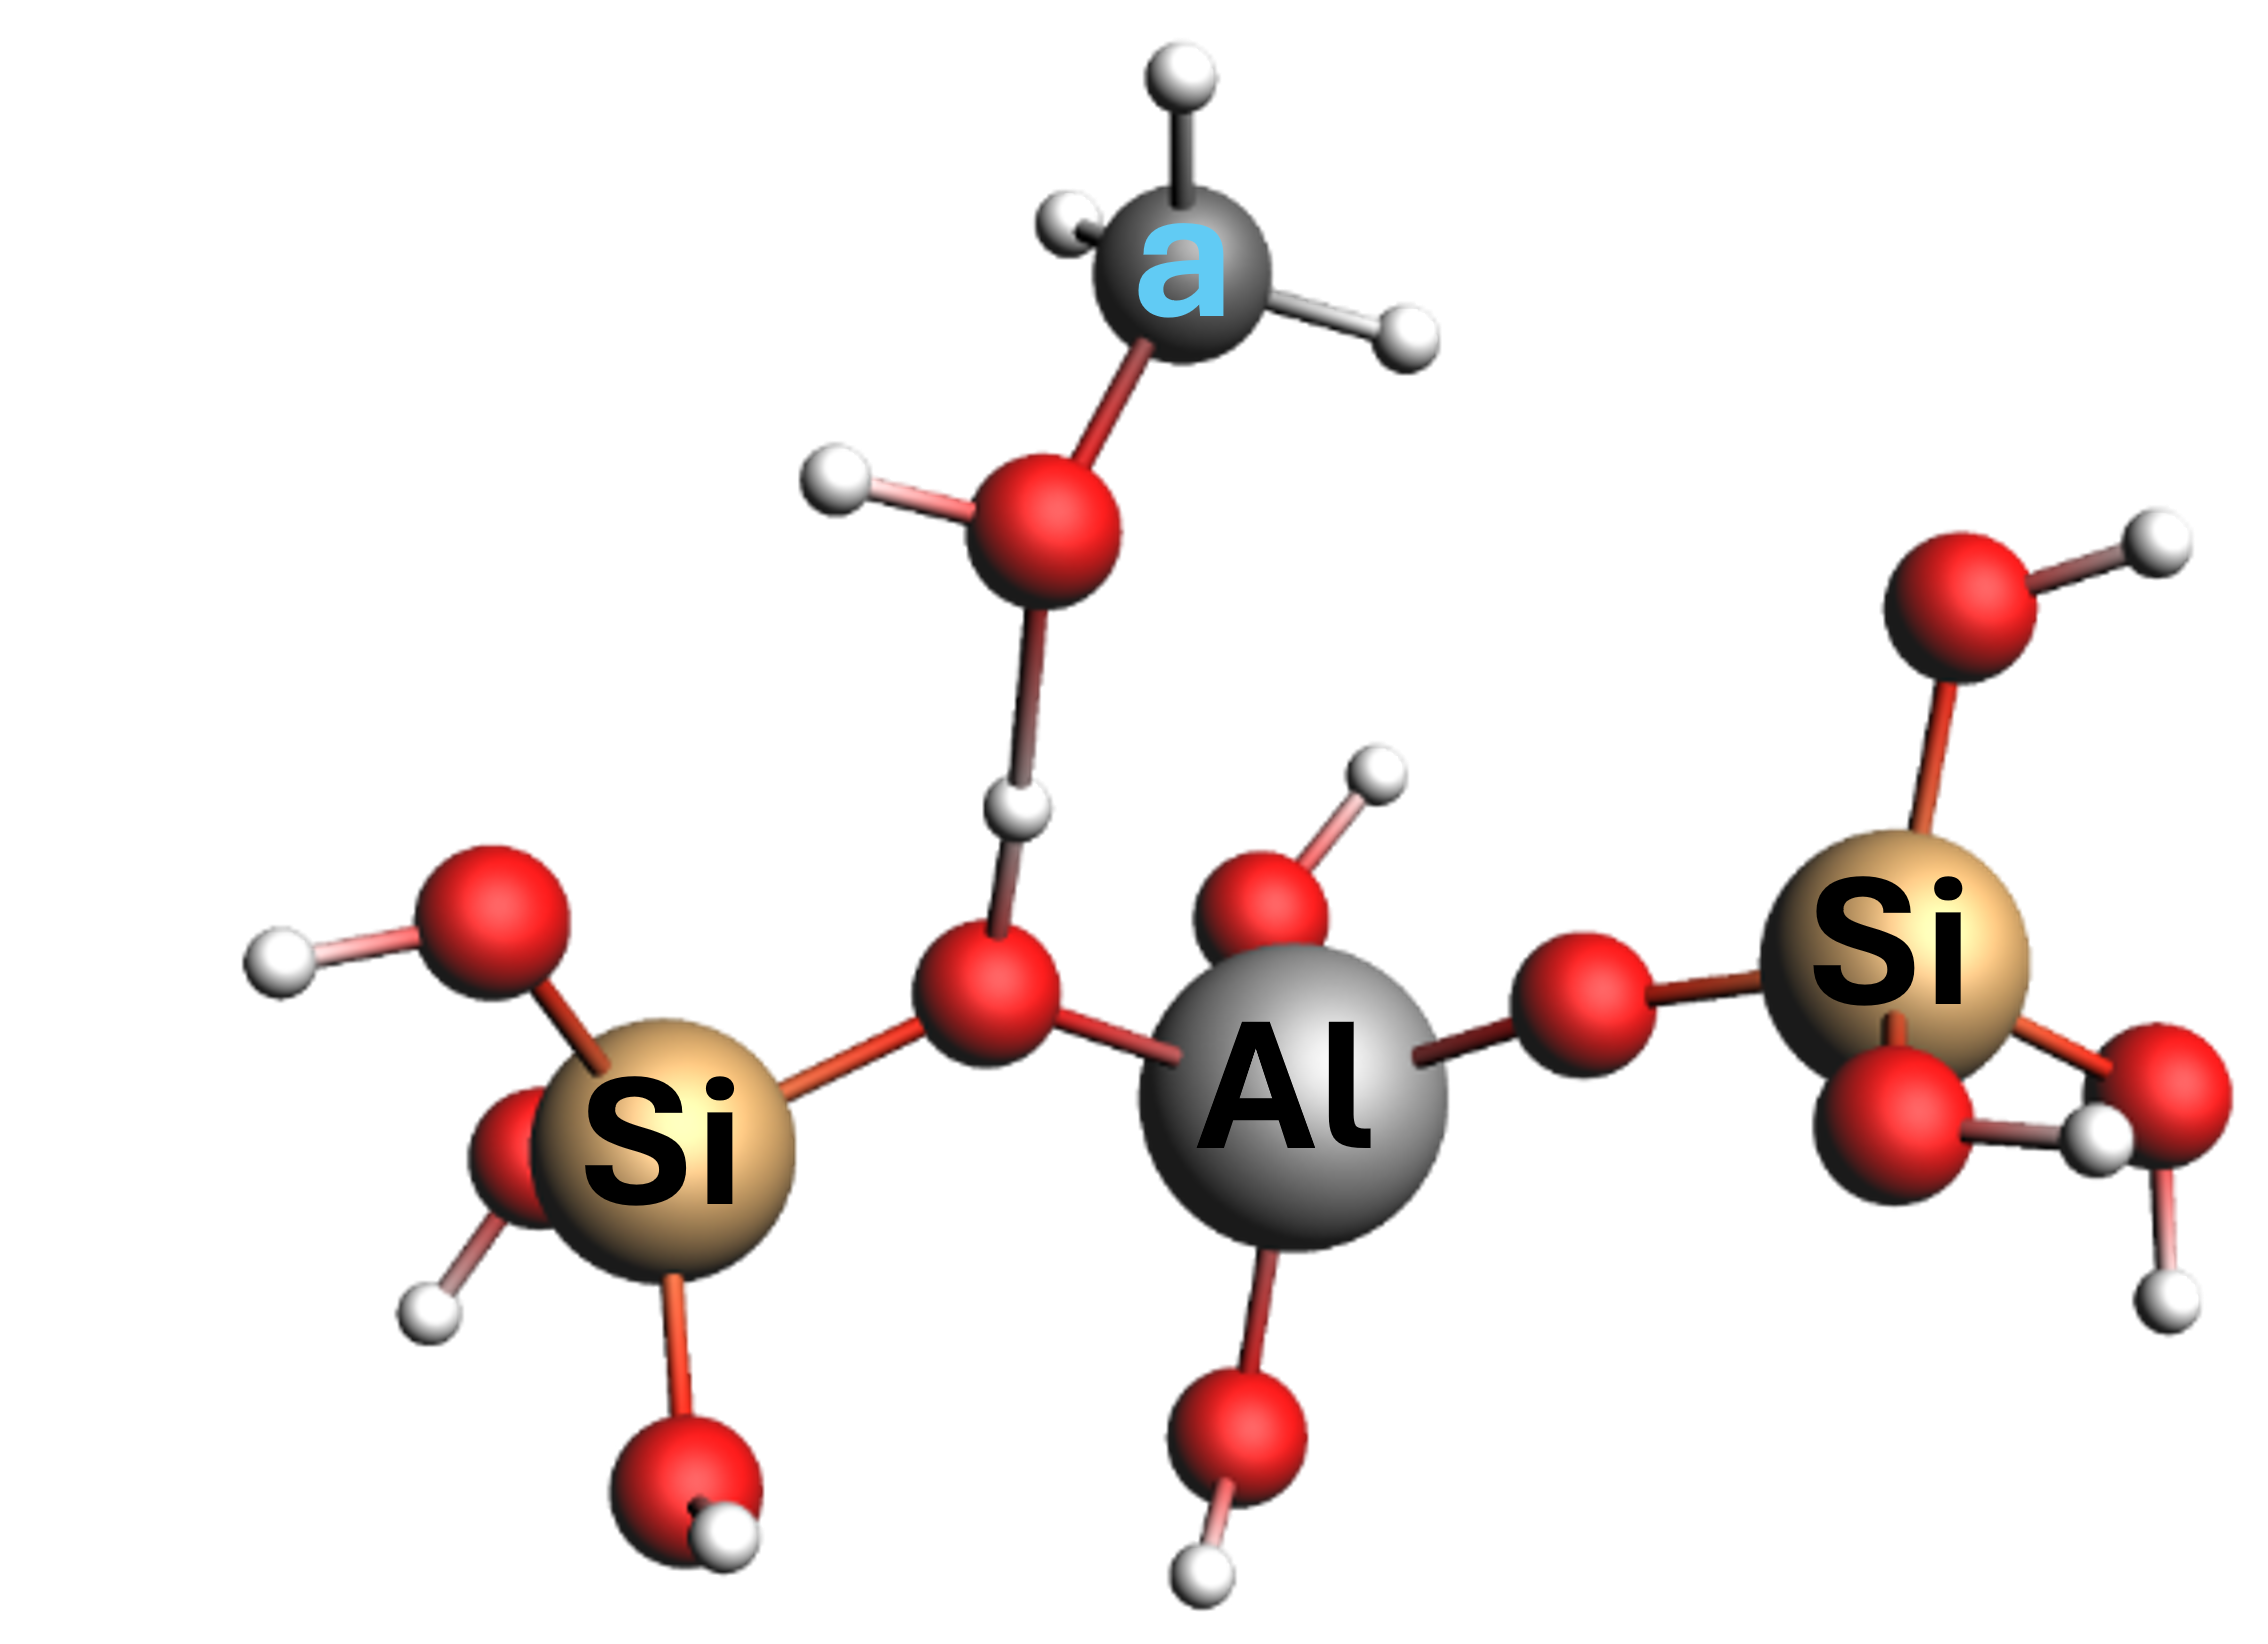  CH3OH bound at BAS in Al-BEA | -- | a = 49.5  Bond lengths:   - BA-O-H (O-H) = 1.049 Å - BA-H to O (-OH, CH3OH) = 1.513 Å | a = 49.6  Bond lengths:   - BA-O-H (O-H) = 1.047 Å - BA-H to O (-OH, CH3OH) = 1.519 Å |

**Table S10**. Comparisons between DFT-predicted peak shifts and bond lengths without the COSMO model (i.e., gas-phase) and with the COSMO model in a solvent continuum of acetonitrile or methanol.

Comparison of the predicted and calculated peak shifts for the liquid phase (Table S8) and surface-bound species (Table S9) to the experimentally observed peak shifts yields some interesting observations and points of discussion. First, the DFT predictions appear to frequently predict a shift further downfield for the (a) carbon attached to the chlorine within C3H5ClO, intermediate carbocations, and the ring-opened products. The experimentally obtained spectra for C3H5ClO and terminal ether standards confirm this over-prediction, as the DFT predicts shifts for (a) that are ~4 and ~8 ppm greater than those demonstrated by experiment for the respective molecules. While we cannot confirm the same for other products or intermediates (no standards available), we expect a similar over-prediction downfield from the DFT-calculated shifts.

A significant overlap of peaks occurs in the 45-55 ppm range in spectra collected during C3H5ClO ring-opening with CH3OH, as shown in Figure 4 and sections below (*vide infra*). This region contains peaks originating from liquid-phase and adsorbed CH3OH-derived species, the (a) carbon on liquid-phase C3H5ClO, intermediate carbocations, and the ring-opened products, and the (c) carbon on liquid-phase C3H5ClO. Therefore, we utilized the peak areas of carbon atoms that are not convoluted to track peak growth and measure the concentrations of the products and reactants in the NMR rotor. We utilized the secondary epoxide carbon (b) for C3H5ClO and secondary carbon (b) in both the terminal ether and terminal alcohol. We acknowledge that the formation of the TE product convolutes the primary carbocation features in the range of 69-73 ppm, which likely increases the error of peak area deconvolution for these species. We assume that all carbons show equal peak areas, supported by comparisons of the peak areas of the epoxide carbons in the absence of the reaction.

Comparison of the DFT-computed peak shifts for the (b) and (c) carbons in the secondary carbocation bound to Al-BEA (b = 89.0 ppm, c = 63.0 ppm), terminal alcohol bound to Al-BEA (b = 91.6 ppm, c = 61.8 ppm), and liquid-phase terminal alcohol (b = 85.7 ppm, c = 68.5 ppm) provide insight into intermediate and product formation in Figure 4a. The broad nature of the evolving peak between 80-90 ppm suggests that all three of the (b) carbons from these species contribute and convolute peak assignments. However, the peaks at ~63 and ~67 ppm match well with the (c) carbon predictions for the secondary carbocation and liquid-phase terminal alcohol, which appear much more intensely than a very minor peak at ~62 ppm that matches the bound terminal alcohol prediction. Considering these intensities and the growth patterns of the peaks, where the ~63 ppm peak first evolves and is followed by the ~67 ppm peak, the product formation pathway becomes clear. The secondary carbocations first form on the surface, then the terminal alcohol product desorbs quickly once formed (explaining the very low intensity of bound terminal alcohol features). Cross-referencing the (c) carbon predictions for Sn-BEA bound species with Figure 4b yields a similar observation of rapid desorption of the terminal alcohol following secondary carbocation formation and reaction with CH3OH. Figure S32 (*vide infra*) presents an analogous experiment to Figure 4, except Figure S32 shows faster and greater accumulation of intermediate and product peaks because the reaction was initiated by adding all species to the NMR rotor simultaneously. The evolution of the peaks at ~62, ~63, and ~67 ppm in Figure S32 illustrates the full cycle of terminal alcohol formation (further discussion provided below).

DFT predicts that coordination of the terminal alcohol product to a framework Sn atom in Sn-BEA is highly unfavorable (bond length = 6.202 Å) (Table S9). The terminal alcohol instead prefers to bind to an adjacent Si-OH group (bond length = 1.732 Å). In contrast, the terminal ether product binds more favorably to framework Sn (bond length = 2.481 Å). The difference between the binding configurations of the products may align with the significantly greater selectivity to the terminal ether during C3H3ClO ring-opening over Sn-BEA (Figure 7). While the peak areas in Figure 2 predict a primary to secondary carbocation ratio of 2.4 over Sn-BEA, the unfavorable binding of the terminal alcohol to Sn sites may contribute to the preference of Sn-BEA to form the terminal ether through either SN1 or SN2 reaction pathways.

The DFT-computed shifts for the (b) and (c) carbons unfortunately overlap more significantly for the primary carbocation bound to Al-BEA (b = 74.6 ppm, c = 71.1 ppm), terminal alcohol bound to Al-BEA (b = 77.2 ppm, c = 73.6 ppm), and liquid-phase terminal alcohol (b = 77.9 ppm, c = 75.9 ppm), with a similar issue for Sn-BEA as well. The narrow distribution of peak shifts aligns with the convoluted features observed from 69-76 ppm in Figure 4a (as discussed above), which precludes the precise observation of product formation and desorption possible for the terminal alcohol product. Nevertheless, the qualitative observation of evolving peak features in this region still demonstrates the formation of primary carbocations and the subsequent formation of terminal ether species.

Lastly, the predicted DFT binding structures for the secondary carbocation and terminal alcohol species suggest that these species will bind to the surface in a flatter configuration than other bound species, including CH3OH, C3H5ClO, the primary carbocation, and terminal ether. The positively charged secondary carbon should coordinate with the proton in the secondary carbocation species, while the terminal alcohol product should bind through the -OCH3 group that attaches to the same secondary carbon. This observation likely explains why the peaks originating from the secondary carbon in the terminal alcohol and secondary carbocation appear much more broadly than any other peaks in the NMR spectra, which makes these peaks difficult to observe and deconvolute. The flat binding configuration of these species on the zeolite surface likely leads to less freedom of motion for the secondary carbon compared to the other carbon atoms in the same molecules, which may cause the secondary carbon peaks to appear more broadly and difficult to observe.

**S11.2. 13C NMR Spectra for Liquid-Phase C3H5ClO and CH3OH**


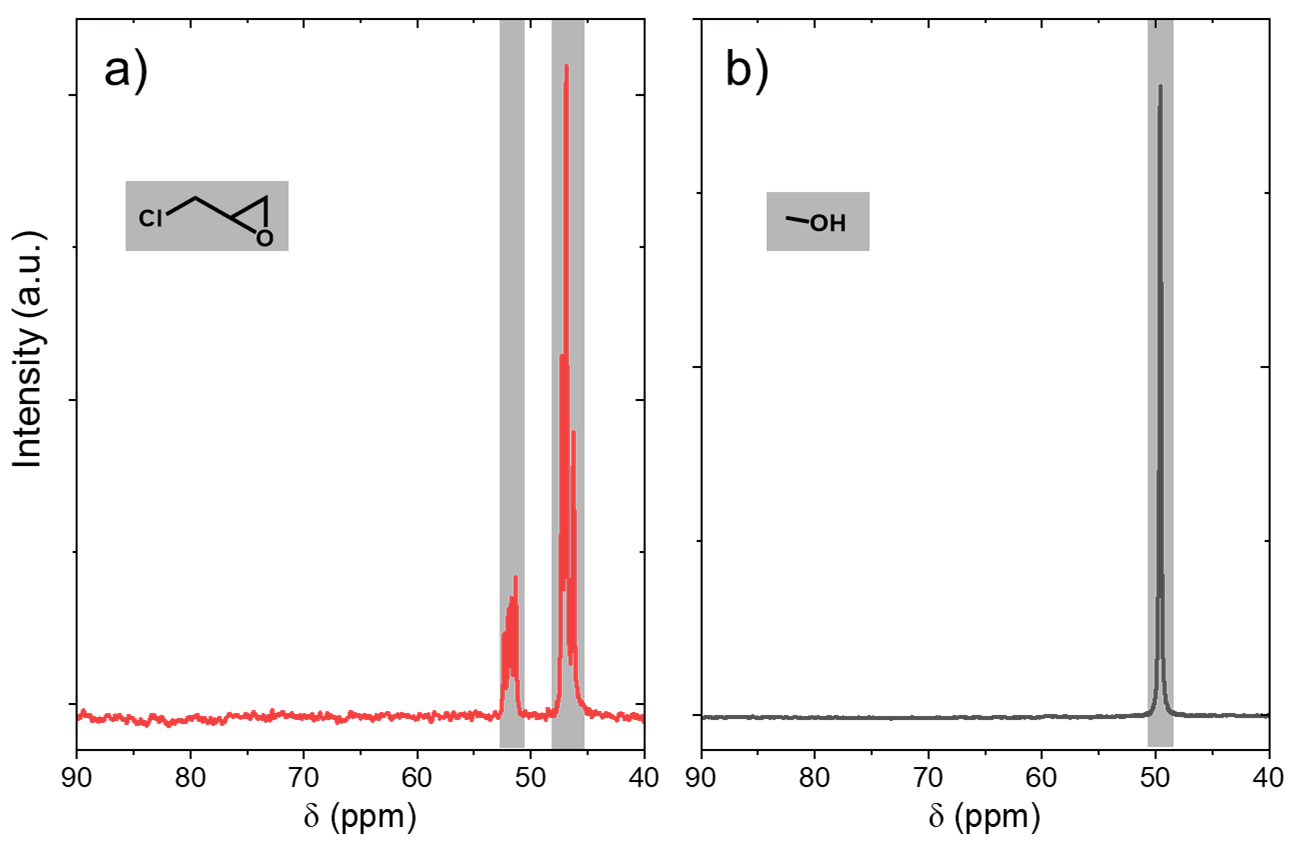
**Figure S22**. 13C NMR single-pulse spectra of a) C3H5ClO and b) CH3OH without catalyst present (0.2 M 13C3H5ClO or 13CH3OH, CH3CN, 298 K). Spectra are an average of 268 scans (C3H5ClO) and 68 scans (CH3OH).

Figure S22 displays single-pulse spectra for C3H5ClO and CH3OH diluted in CH3CN and without catalyst present. These spectra show the characteristic 13C peak shifts for the carbons within C3H5ClO and CH3OH, highlighted in red and black, respectively. As discussed in Section S11.1, the DFT-calculated peak shifts closely predict all peak locations except for the carbon directly bound to -Cl in C3H5ClO.

**S11.3. 13C NMR Spectra and Analysis for C3H5ClO Adsorption and Carbocation Formation**


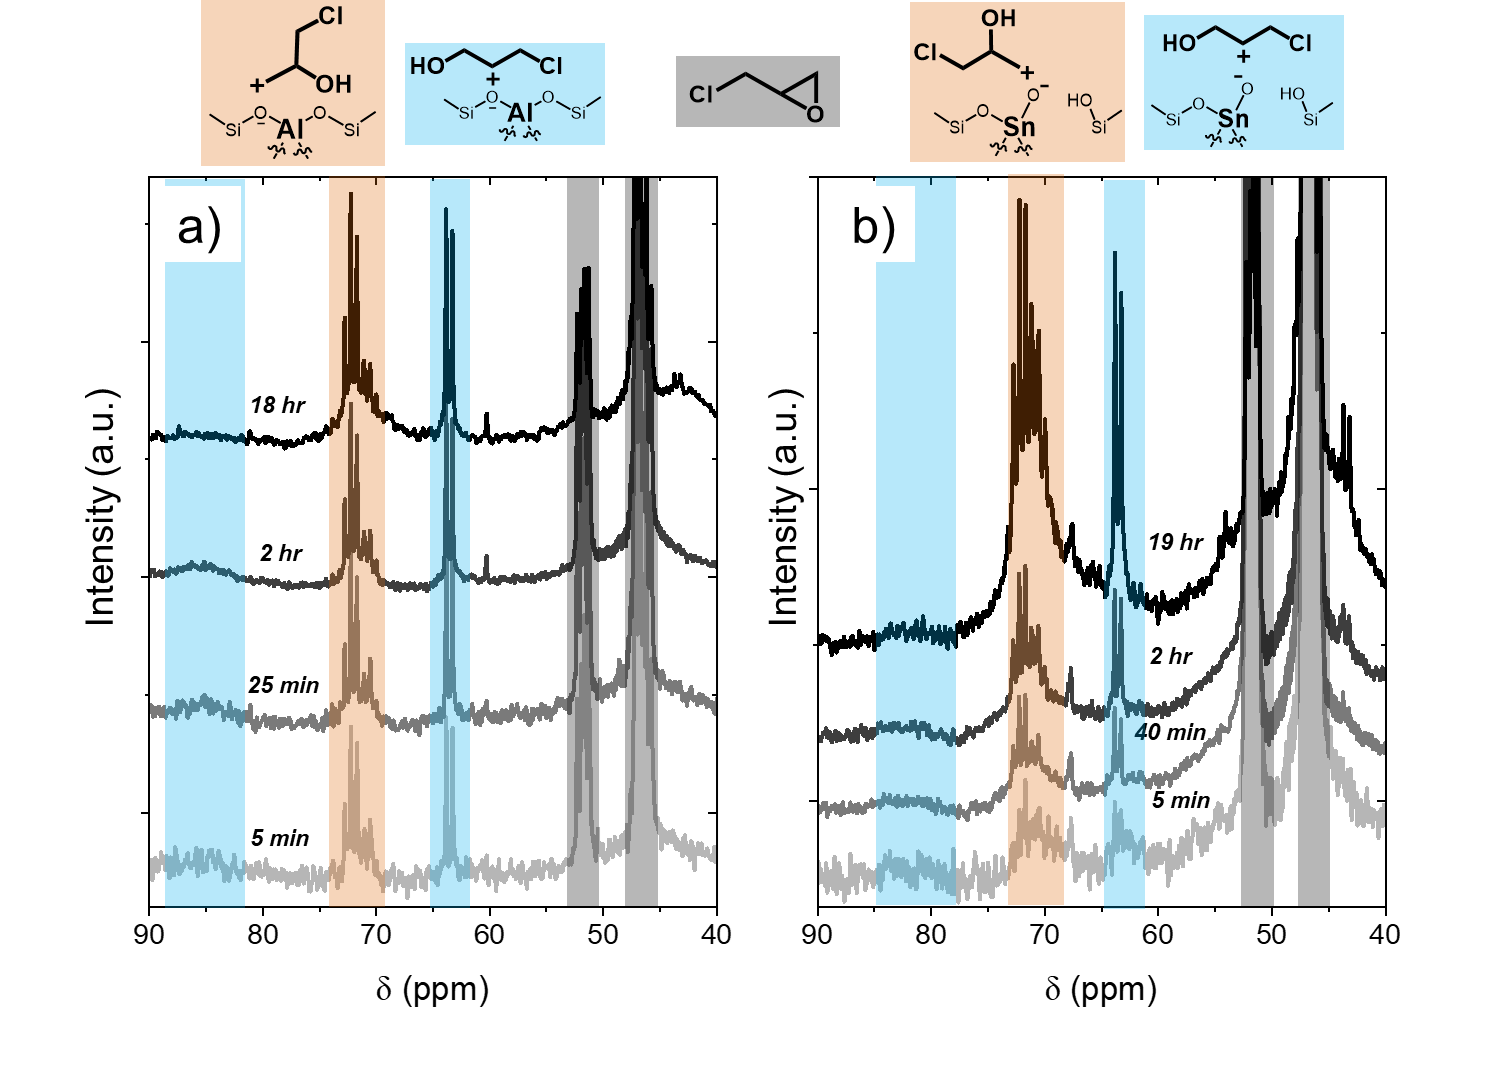


**Figure S23**. 13C NMR single-pulse spectra collected as a function of time during adsorption of C3H5ClO to a) Al-BEA and b) Sn-BEA (0.2 M 13C3H5ClO, CH3CN, 298 K). Spectra are an average of scans, ranging from 24 scans (5 min time points) to 256 scans (last time points).

Figure S23 shows the single-pulse spectra for C3H5ClO adsorption as a function of time. The peak assignments match well with the computationally predicted and experimentally calculated peak shifts shown in Section S11.1. The peak areas of the ring-opened carbocation species increase relative to C3H5ClO over time, supporting that more C3H5ClO opens to form carbocations over time. The carbocation peaks accumulate less rapidly over Sn-BEA than Sn-BEA. The open sites (Sn-OH) within Sn-BEA likely have a weaker Brønsted acidity than the Brønsted acid sites within Al-BEA, which likely leads to a slower activation of C3H5ClO and a lower quantity of ring-opened carbocations over Sn-BEA. Furthermore, the peak areas of the carbocation features do not decrease over a long period (> 18 hr). The stability of these features supports that the C3H5ClO irreversibly ring-opens to form stable carbocations on the Al-BEA and Sn-BEA surface.

Notably, the ratio of primary to secondary ring-opened carbocations over Sn-BEA during the ring-opening reaction within the NMR rotor shown in Figures 5 and 6 (1.2 – 2.5) of the main text generally falls below the ratio observed in the absence of the reaction (2.4, Figure 2 of main text). In contrast, the ratio during the reaction over Al-BEA (1.3 – 2.3) typically exceeds the ratio without the reaction occurring (1.4, Figure 2). Nevertheless, the different trends in the carbocation ratios between Sn-BEA and Al-BEA in the presence and absence of the ring-opening reaction likely signal that the reactivity of these carbocations differs between the two catalysts. The primary carbocation may show a greater reactivity over Sn-BEA, which reduces the quantity of these species and lowers the carbocation ratio on the surface, while the primary carbocations may have lesser reactivity over Al-BEA and lead to a greater carbocation ratio on the surface. Despite the difference in carbocation ratios between Figure 2 and Figures 5 and 6, the greater prevalence of the primary relative to secondary ring-opened carbocation holds in all cases. The preference towards forming the primary carbocation, originating from differences in and , likely primarily governs differences at low [CH3OH]:[C3H5ClO] ratios in Figure 7.


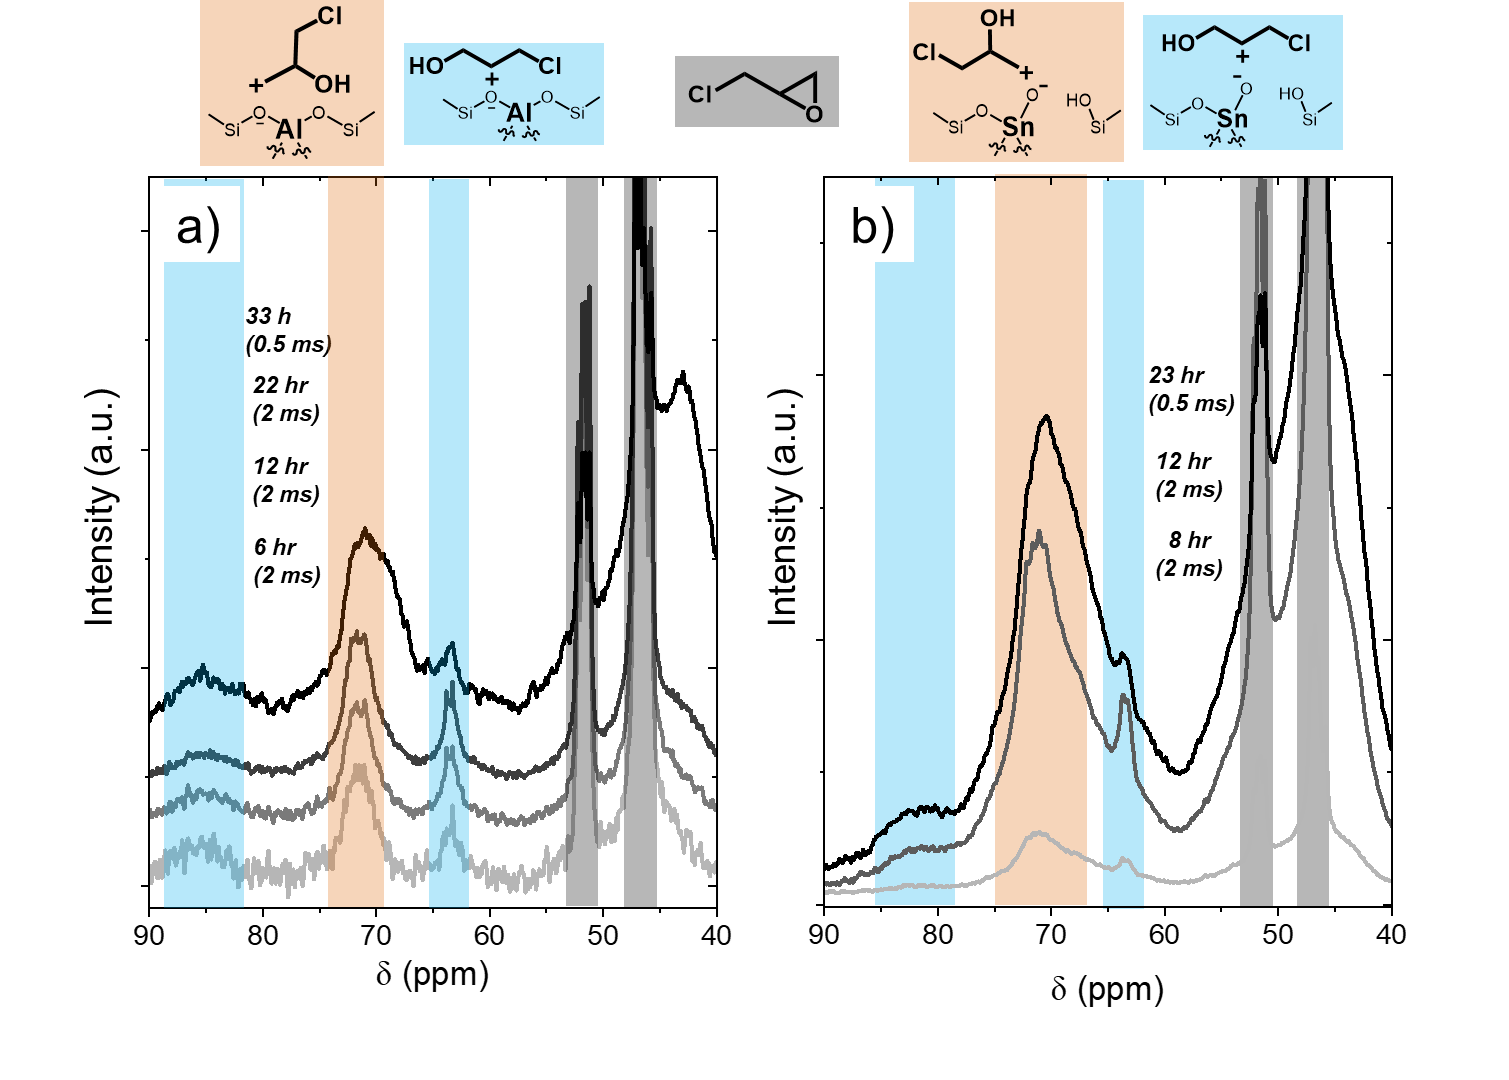


**Figure S24**. 13C NMR cross-polarization spectra collected as a function of time during adsorption of C3H5ClO to a) Al-BEA and b) Sn-BEA (0.2 M 13C3H5ClO, CH3CN, 298 K). Contact times are shown in parentheses. Spectra are an average of scans, ranging from 756 to 10,000 scans.

Figure S24 reveals the cross-polarization spectra for C3H5ClO adsorption over time. Features corresponding to the ring-opened carbocations and intact C3H5ClO both appear in the spectra, aligning with tabulated values from Section S11.1. The broad nature of the carbocation features supports that these species are bound to the surface. The sharp nature of the C3H5ClO in Al-BEA suggests that these features originate from liquid-phase C3H5ClO that resides near the surface but is not bound to the surface. In contrast, the broader nature of the C3H5ClO features over Sn-BEA supports that a fraction of surface C3H5ClO exists as an intact molecule rather than ring-opened carbocations.

Of note, the intensity of the ring-opened carbocation peaks increases relative to intact C3H5ClO when the contact time is decreased from 2 ms to 0.5 ms. This supports that the ring-opened carbocations bind more strongly to the surface than C3H5ClO.

**S11.4. 13C NMR Spectra and Analysis for CH3OH Adsorption**

Figure S25 displays the single-pulse spectra for CH3OH adsorption as a function of time. The peak for physisorbed CH3OH at Si-O-Si features (green) appears from very early times in both catalysts. in which the ring-opening reaction was initiated by adding CH3OH (0.2 M CH3OH). The chemisorbed (yellow) and protonated (purple) CH3OH species appear slowly over time in Al-BEA, demonstrating the formation of activated CH3OH intermediates at the Brønsted acid sites. Interestingly, chemisorbed CH3OH appears from much lower times within Sn-BEA, suggesting that Sn-BEA may activate more strongly and more rapidly over Sn-BEA than Al-BEA.

**
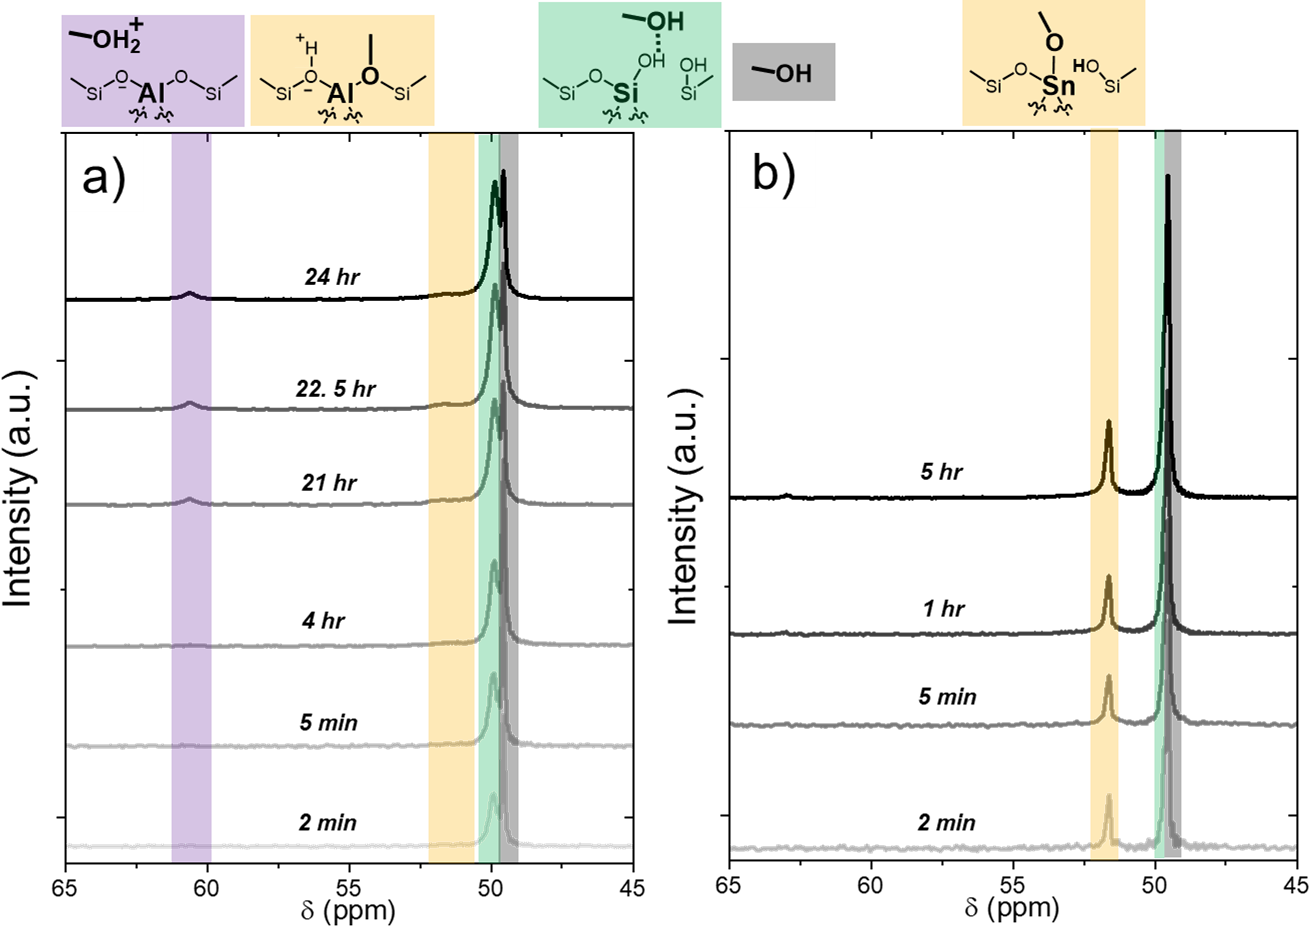
**

**Figure S25**. 13C NMR single-pulse spectra of 13CH3OH on a) Al-BEA and b) Sn-BEA (0.2 M 13CH3OH, CH3CN, 298 K) collected as a function of time after initial contact between the liquid solution and the zeolite. Spectra are an average of scans, ranging from 16 scans (2 min time points) to 2000 scans (last time points).

Figure S26 displays the cross-polarization spectra for CH3OH adsorption as a function of time. These spectra show the key adsorption peaks also observed in the single-pulse spectra in Figure S25: physisorbed CH3OH at Si-O-Si features (green), chemisorbed CH3OH (yellow), and protonated CH3OH (purple) species. Figure S26 provides further support that CH3OH adsorbs to the *BEA framework and activates at both Brønsted and Lewis acid sites.

**
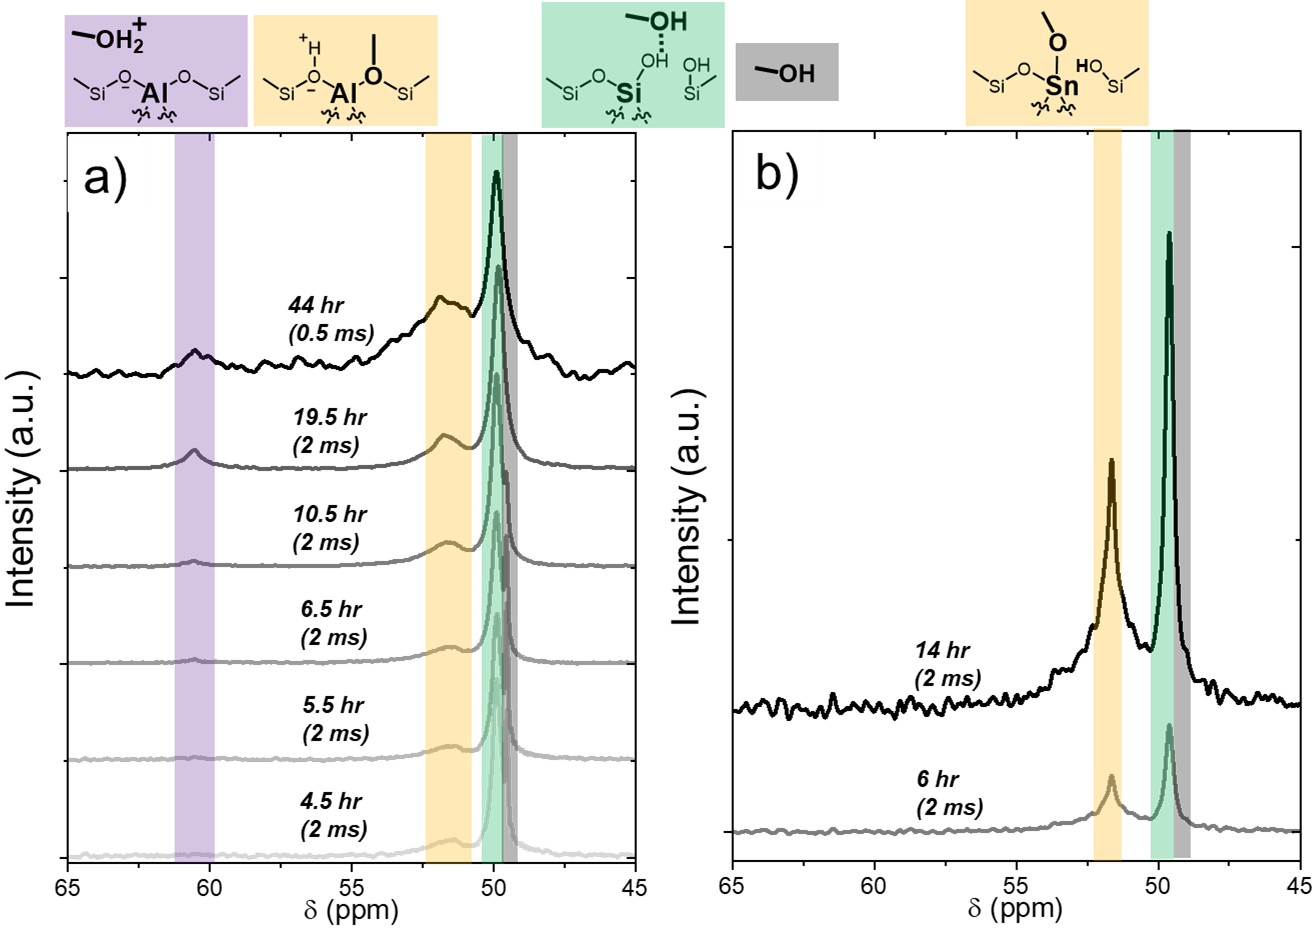
**

**Figure S26**. 13C NMR cross-polarization spectra of 13CH3OH on a) Al-BEA and b) Sn-BEA (0.2 M 13CH3OH, CH3CN, 298 K) collected as a function of time after initial contact between the liquid solution and the zeolite. Contact times are shown in parentheses. Spectra are an average of scans, ranging from 734 to 8,000 scans.

**S11.5. Supplemental 13C NMR Spectra from C3H5ClO Ring-Opening with CH3OH**


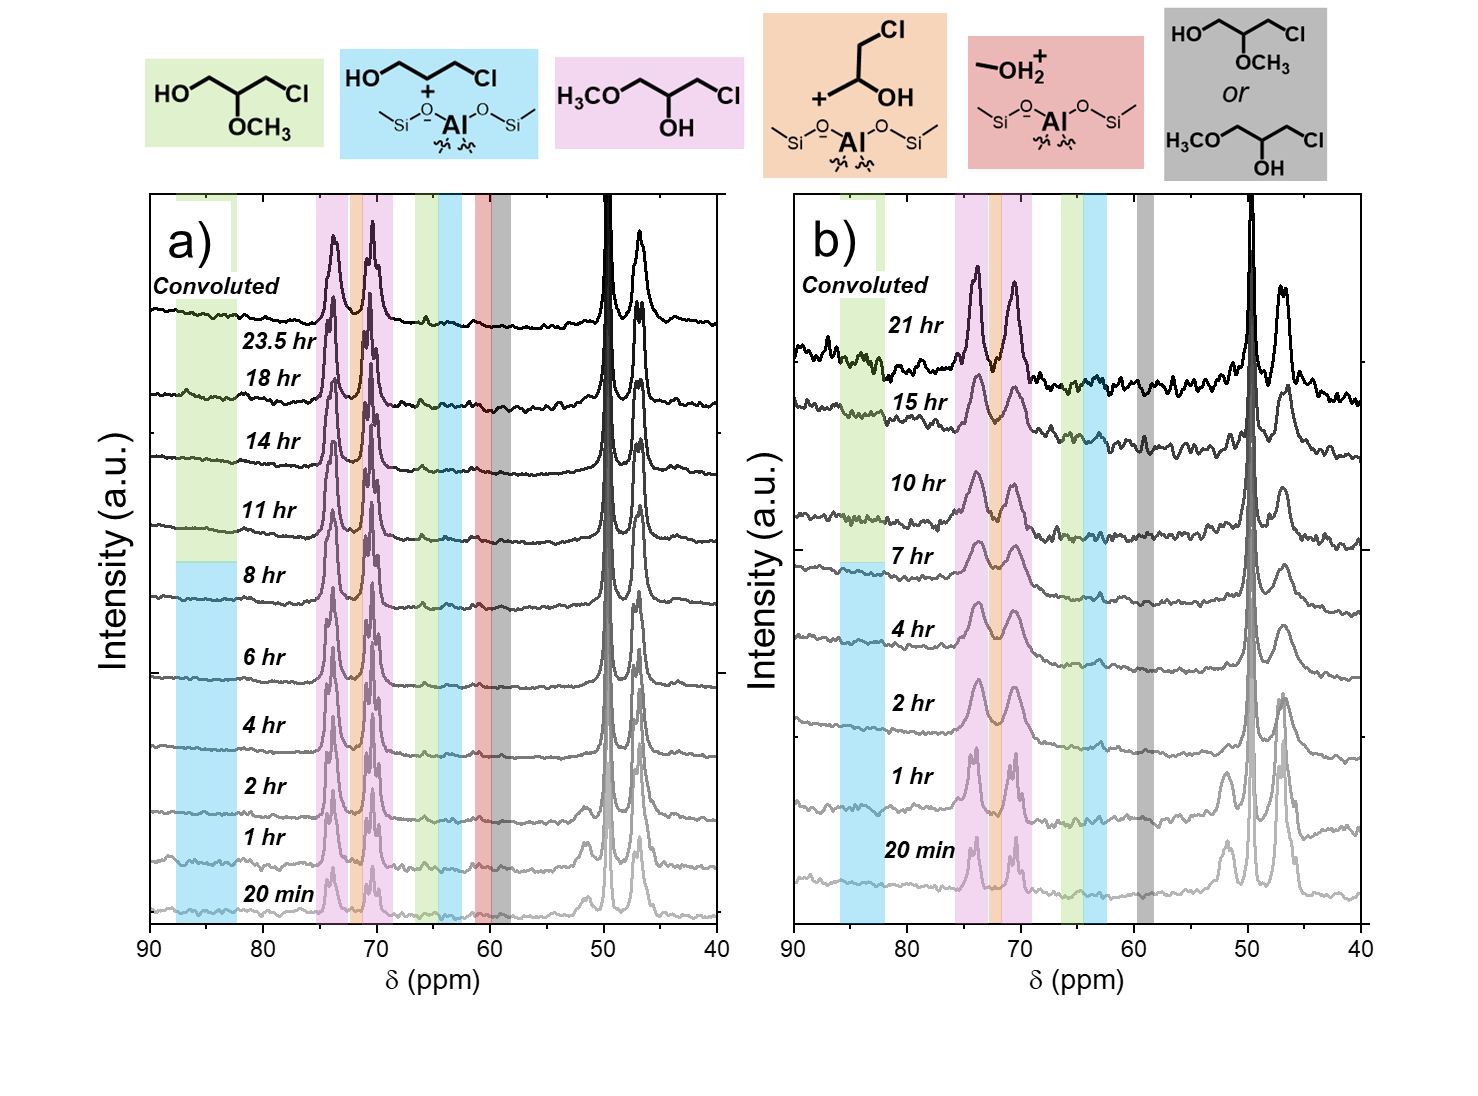


**Figure S27**. 13C NMR single-pulse spectra during ring-opening of C3H5ClO with CH3OH over a) Al-BEA and b) Sn-BEA, where reaction was initiated by adding all components to the rotor at once (0.2 M 13C3H5ClO, 6 M CH3OH, CH3CN, 298 K). Spectra are an average of scans, ranging from 64 scans (20 min time points) to 2,000 scans (last time points). *Note: these spectra were collected with unlabeled CH3OH, so CH3OH-derived features appear much less intensely.*

Figure S27 presents the single-pulse NMR spectra collected during the ring-opening reaction of C3H5ClO at 6 M CH3OH. The concentration-time profiles derived from these spectra are presented in Figure 6 of the main text. Compared to 0.2 M CH3OH, the carbocation species derived from are more difficult to observe. These features at low intensities over time in Al-BEA (Figure S27a), while the carbocation species do not appear in noticeable quantities over Sn-BEA (Figure S27b). The negligible accumulation of these ring-opened carbocations over both Al-BEA and Sn-BEA in Figure S27 gives evidence that the materials may catalyze ring-opening through similar reaction pathways in CH3OH-rich conditions.


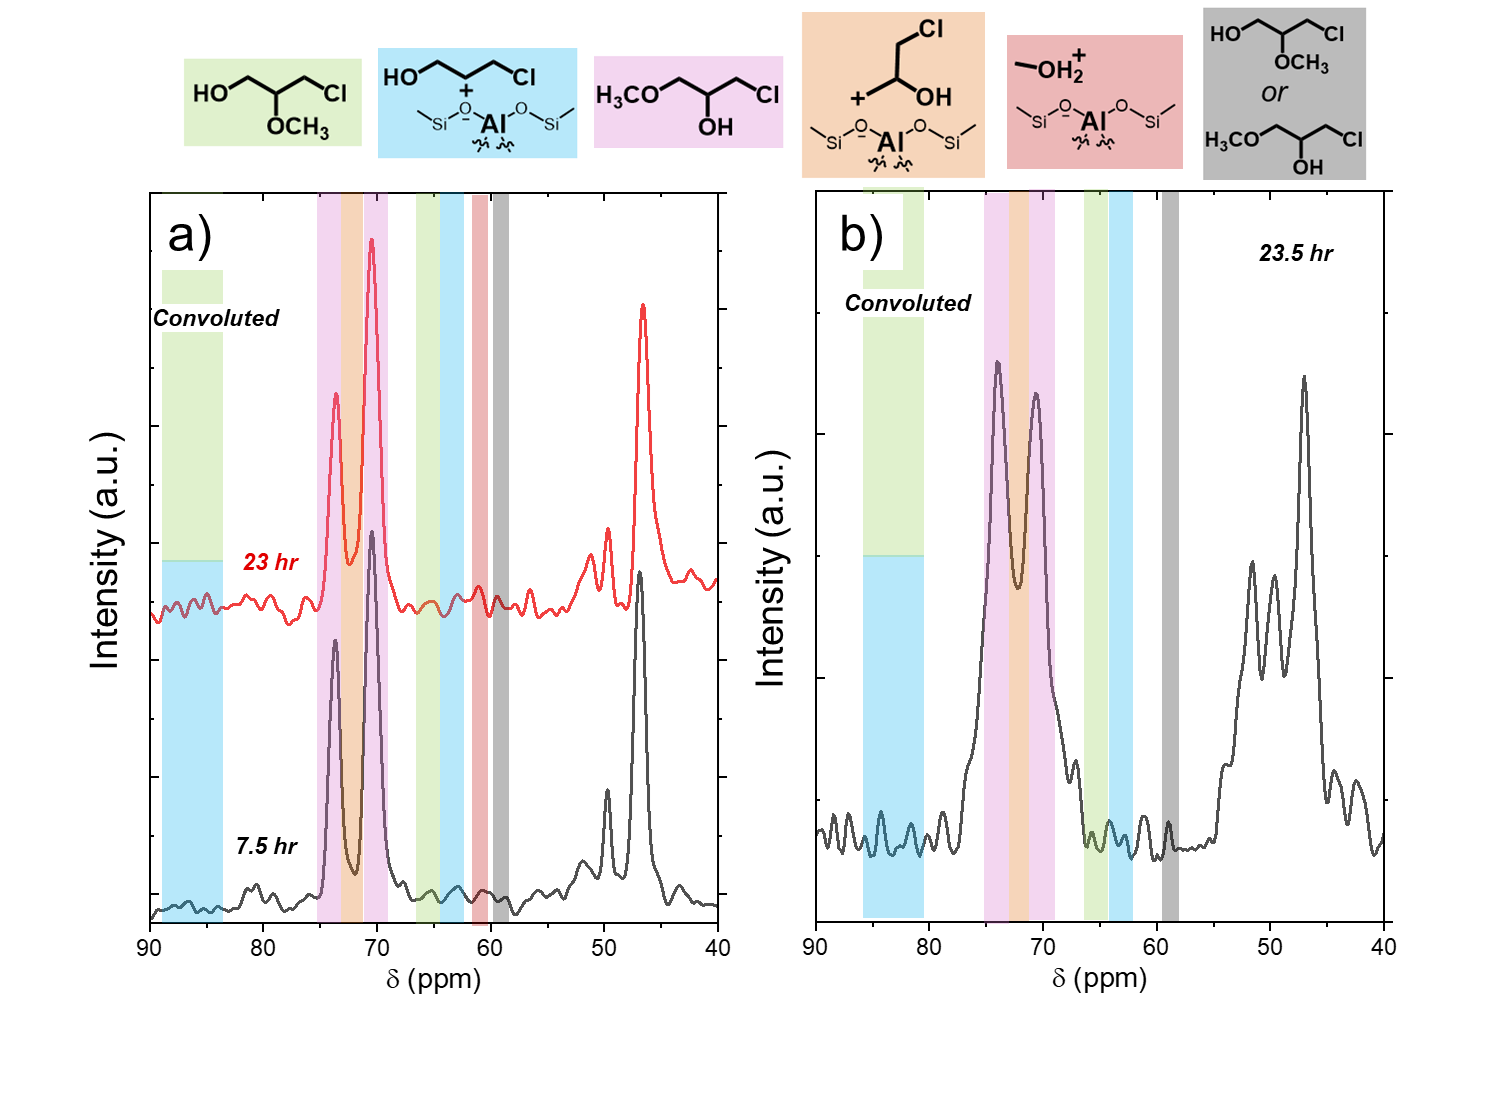
**Figure S28**. 13C NMR cross-polarization spectra during ring-opening of C3H5ClO with CH3OH over a) Al-BEA and b) Sn-BEA, where the reaction was initiated by adding all components to the rotor at once (0.2 M 13C3H5ClO, 6 M CH3OH, CH3CN, 298 K). Contact time was 1 ms for all spectra shown here. Spectra are an average of scans, ranging from 300 to 1500 scans. *Note: these spectra were collected with unlabeled CH3OH, so CH3OH-derived features appear much less intensely.*

Figure S28 presents the cross-polarization spectra for the same experiment discussed in Figure S27 (6 M CH3OH). The ring-opened carbocation species are not visible on the surface from these spectra, further supporting that C3H5ClO ring-opening proceeds through similar SN2 reaction pathways in CH3OH-rich conditions, which do not require the formation of the ring-opened carbocations as intermediates.

Figure S29 displays the cross-polarization spectra for the experiments shown with the single-pulse spectra in Figure 4 of the main text, where the reaction was initiated by adding C3H5ClO (0.2 M CH3OH). The spectra show a greater quantity of the ring-opened carbocations on the surface of Al-BEA than Sn-BEA, aligning with the interpretation from the single-pulse spectra. The difference in carbocation concentration supports that Al-BEA and Sn-BEA may catalyze ring-opening through different mechanisms in CH3CN-rich conditions.


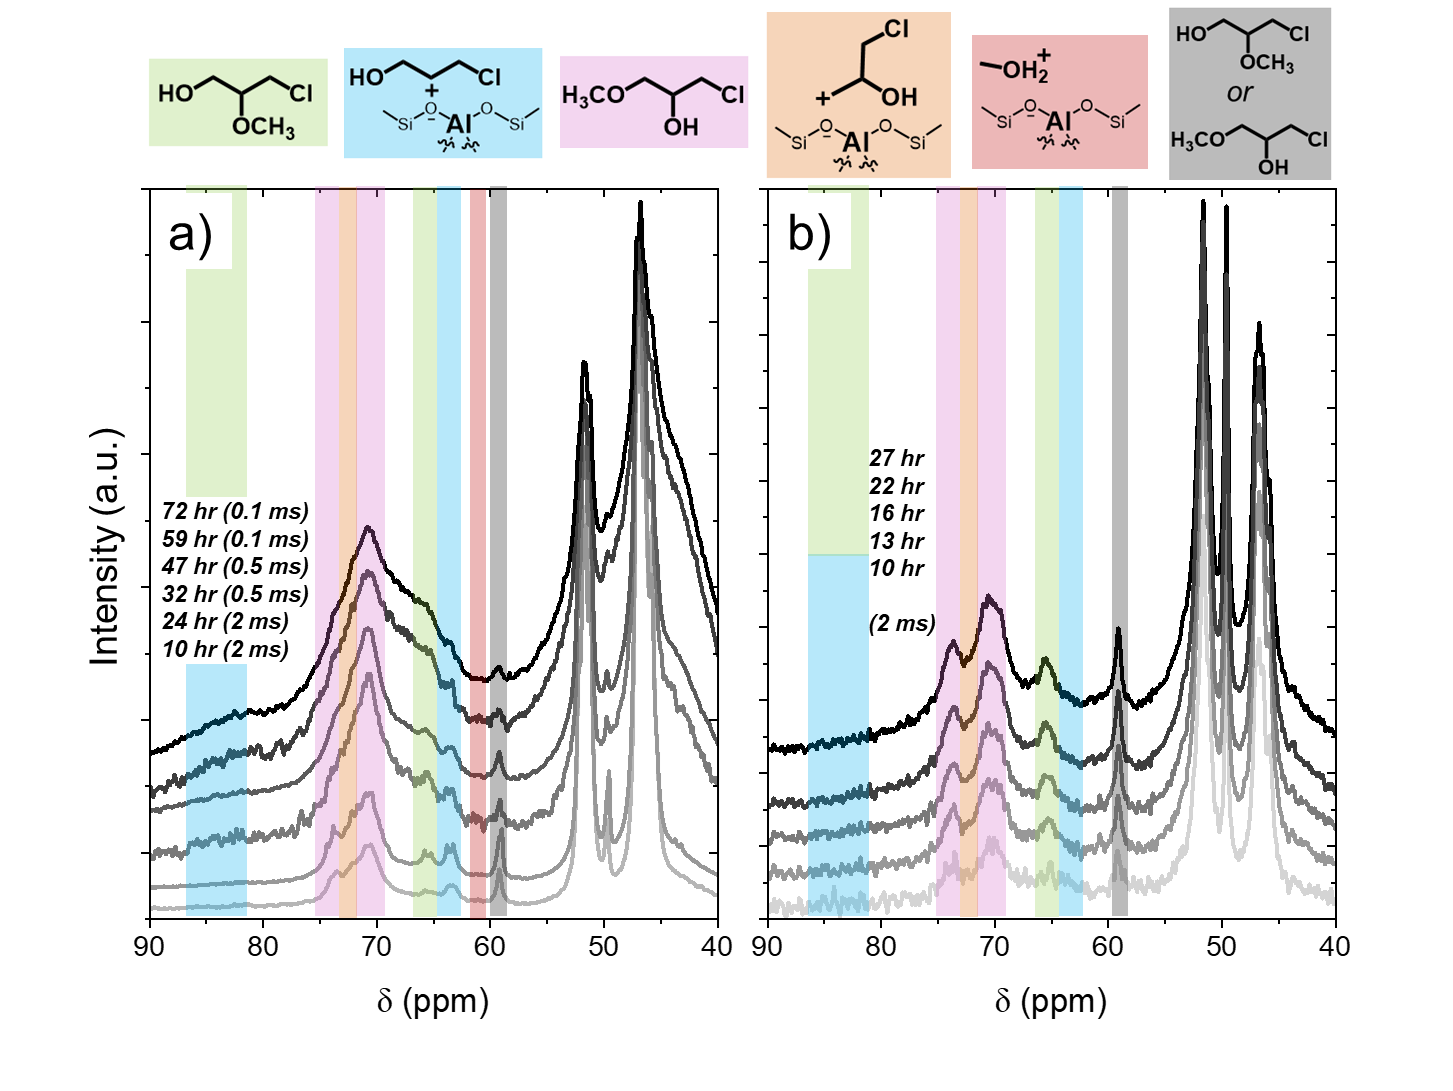


**Figure S29**. 13C NMR cross-polarization spectra during ring-opening of C3H5ClO with CH3OH over a) Al-BEA and b) Sn-BEA, where reaction was initiated by adding 13C3H5ClO to the NMR rotor after pre-mixing all other components (0.2 M 13C3H5ClO, 0.2 M 13CH3OH, CH3CN, 298 K). Contact times are shown in parentheses; the contact time was 2 ms for all spectra in Sn-BEA. Spectra are an average of scans, ranging from 468 to 13,200 scans.

Interestingly, the difference in contact times in Figure S29a leads to differences in the ratio of adsorbed species on Al-BEA. The peak area ratio of CH3OH-derived adsorbates (intact CH3OH, protonated CH3OH) to C3H5ClO-derived species (intact C3H5ClO, ring-opened carbocations, products) decreases as the contact time decreases. A lower contact time leads to greater intensities for more strongly-bound species, suggesting that C3H5ClO-derived adsorbates coordinate more strongly to the Al-BEA surface than CH3OH-derived species. This interpretation aligns with the much more exothermic adsorption enthalpy for C3H5ClO than CH3OH shown in Table S7 (*vide supra*).

Figure S30 presents single-pulse spectra where the ring-opening reaction was initiated by adding CH3OH (0.2 M CH3OH). Interestingly, initiating the reaction with CH3OH slows the reaction down significantly compared to initiating with C3H5ClO. The ring-opened carbocations form before the reaction was initiated with CH3OH, but only a small fraction converts to products over ~24 hr.


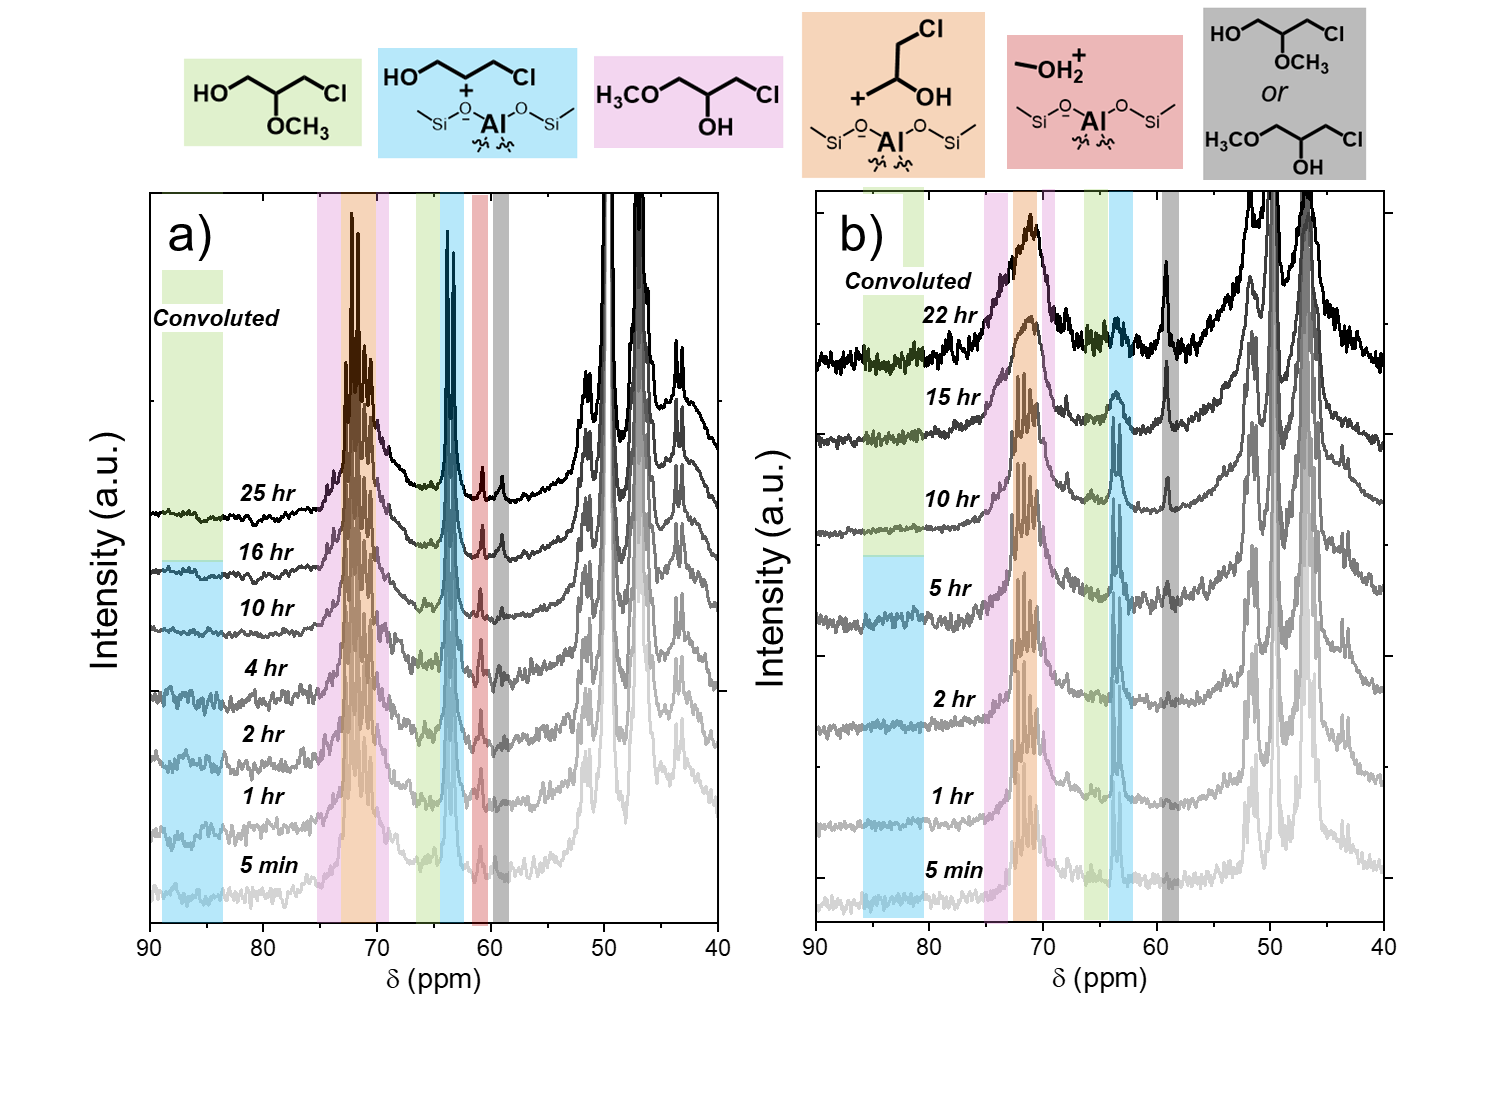


**Figure S30**. 13C NMR single-pulse spectra during ring-opening of C3H5ClO with CH3OH over a) Al-BEA and b) Sn-BEA, where reaction was initiated by adding 13C3H3OH to the NMR rotor after pre-mixing all other components (0.2 M 13C3H5ClO, 0.2 M 13CH3OH, CH3CN, 298 K). Spectra are an average of scans, ranging from 32 scans (5 min time points) to 15,768 scans (last time points).

These spectra may suggest that CH3OH still needs to activate in some capacity to facilitate the ring-opening reaction, even through an SN1 pathway with ring-opened carbocations. C3H5ClO coordinates much more strongly with the active sites than CH3OH, so the pre-treatment of the catalyst with C3H5ClO may prevent CH3OH from easily accessing the active sites.

While the exact reason for the suppression of rates when initiating with CH3OH currently evades understanding, Figure S30 still provides strong evidence that the ring-opened carbocations convert to the terminal ether and alcohol products through an SN1 pathway.


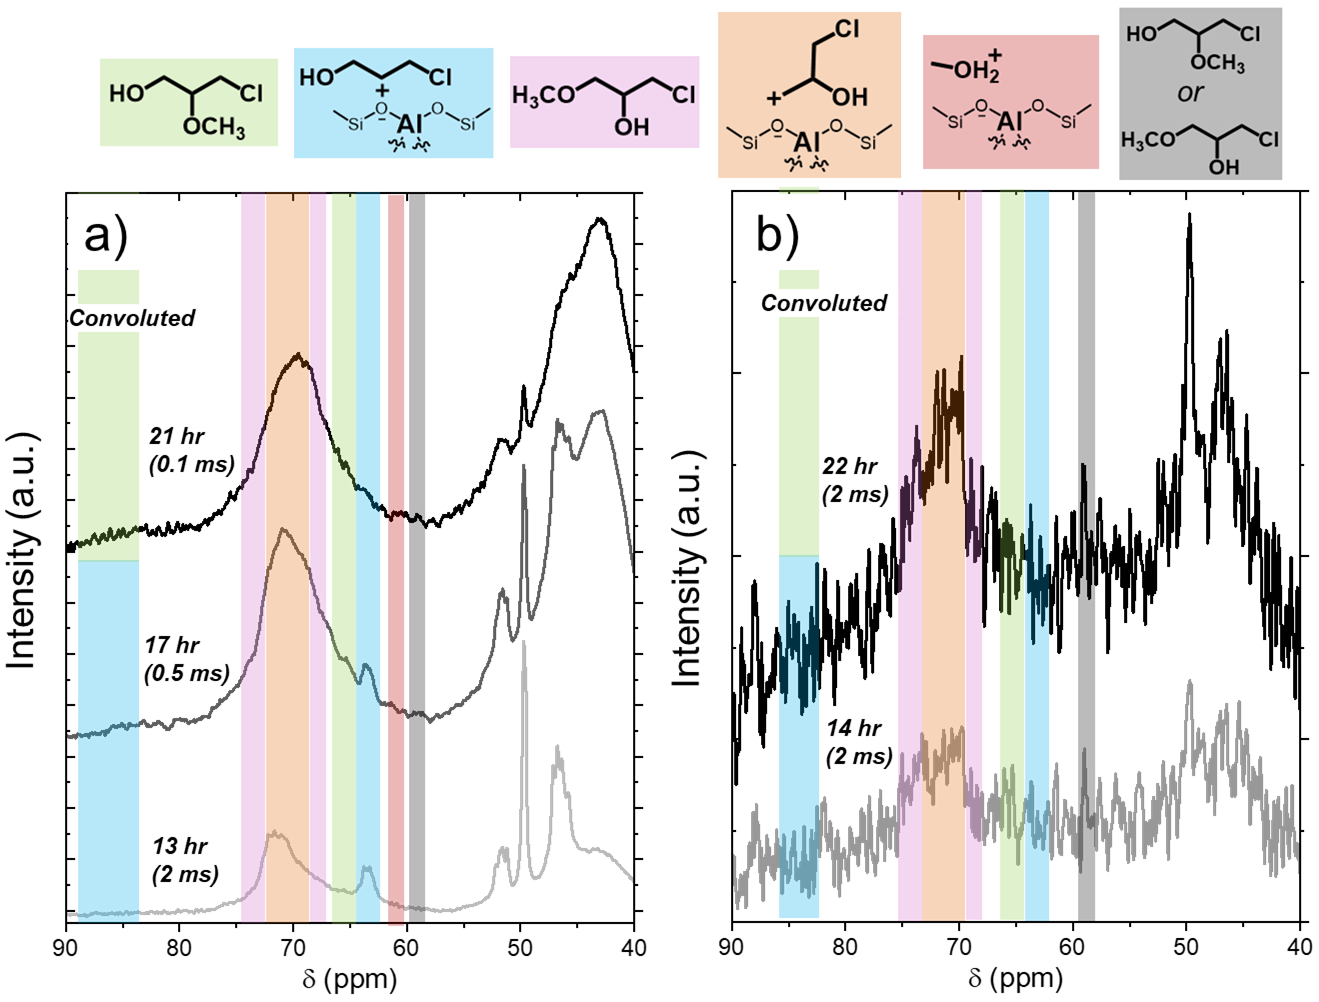


**Figure S31**. 13C NMR cross-polarization spectra during ring-opening of C3H5ClO with CH3OH over a) Al-BEA and b) Sn-BEA, where reaction was initiated by adding 13C3H3OH to the NMR rotor after pre-mixing all other components (0.2 M 13C3H5ClO, 0.2 M 13CH3OH, CH3CN, 298 K). Contact times are shown in parentheses. Spectra are an average of scans, ranging from 754 to 4,096 scans.

Figure S31 presents the cross-polarization spectra from the same experiment in Figure S31, in which the ring-opening reaction was initiated by adding CH3OH (0.2 M CH3OH). As with Figure S29a, decreasing the contact time leads to a decrease in the relative intensity of CH3OH-derived species over Al-BEA in Figure S31a, suggesting that C3H5ClO-derived species coordinate more strongly to the surface.

Figure S32 presents single-pulse spectra where the ring-opening reaction was initiated by adding all the components to the rotor at the start of the reaction (0.2 M CH3OH). This experiment was carried out at an identical CH3OH concentration to the experiments where the reaction was initiated by adding C3H5ClO (Figure 4 of main text) or CH3OH (Figure S30).


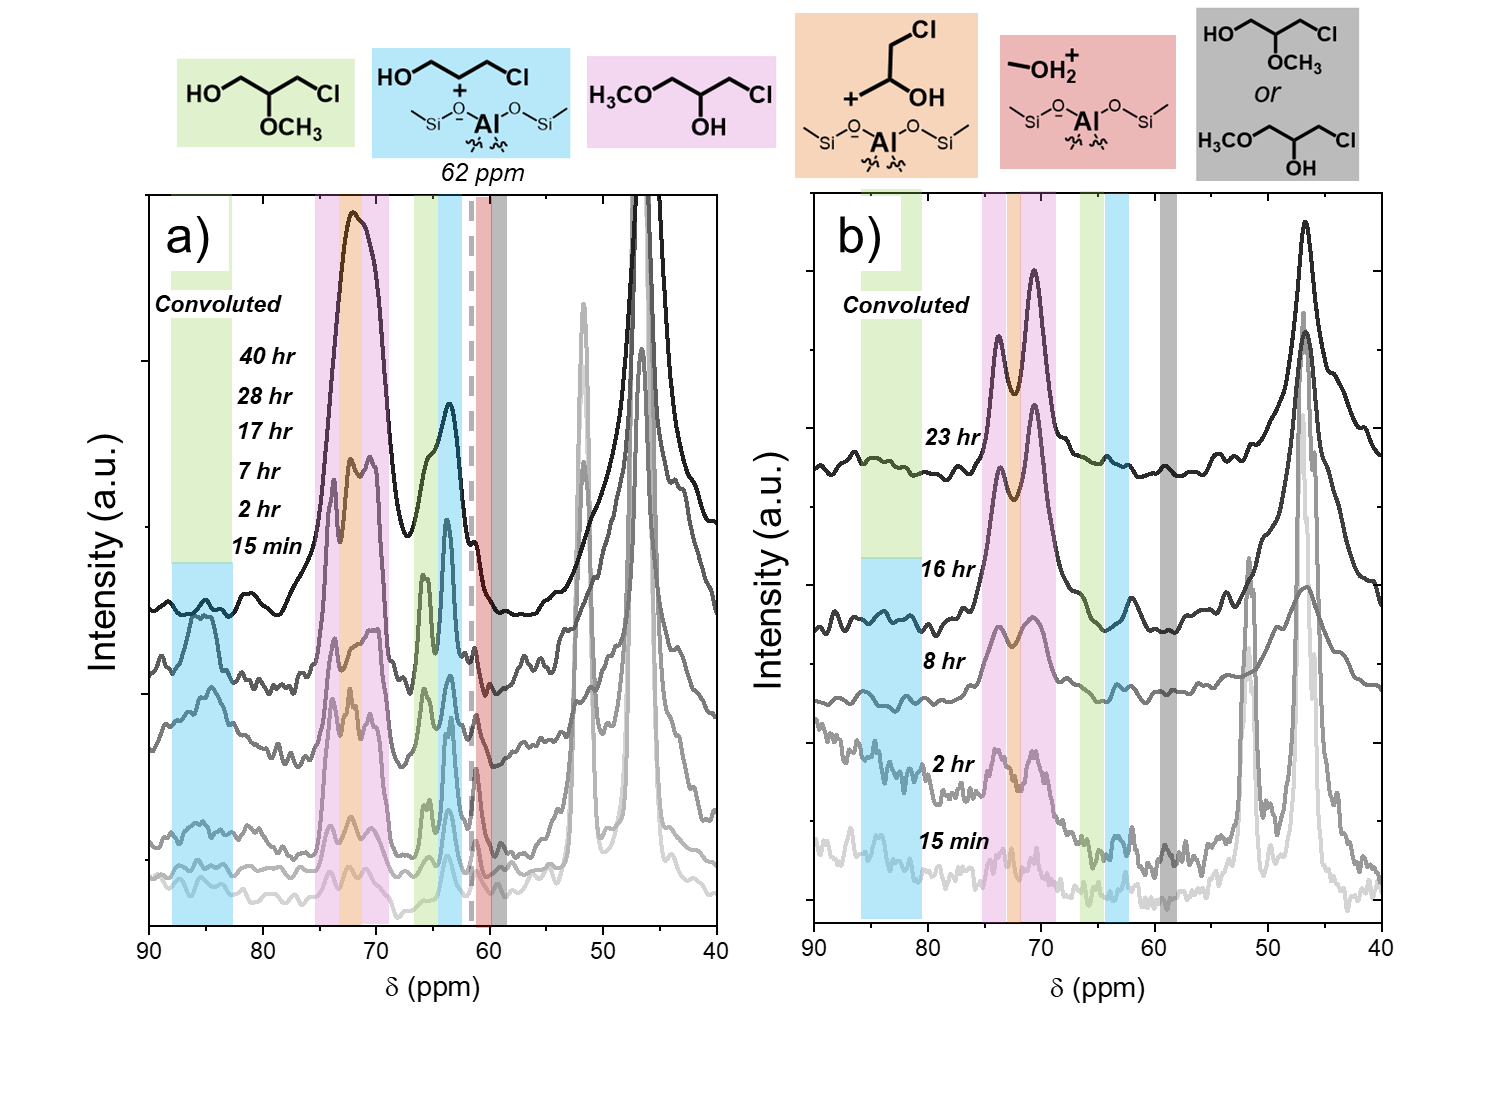


**Figure S32**. 13C NMR single-pulse spectra during ring-opening of C3H5ClO with CH3OH over a) Al-BEA and b) Sn-BEA, where reaction was initiated by adding all components to the rotor at once (0.2 M 13C3H5ClO, 0.2 M CH3OH, CH3CN, 298 K). Spectra are an average of scans, ranging from 32 scans (15 min time points) to 3024 scans (last time points). *Note: spectra were collected with unlabeled CH3OH, so CH3OH-derived features appear much less intensely.*

We chose to present the data where C3H5ClO initiates the reaction in Figure 4 in the main text because initiating with C3H5ClO slows down the reaction to enable easier tracking of the reactant, product, and intermediate peaks. In particular, the method of initiating with C3H5ClO demonstrates the transformation of the ring-opened carbocation intermediates to ring-opened products, as discussed above in Section S11.1. Interestingly, Figure S32 shows an intense peak at ~62 ppm over both Al- and Sn-BEA that is only observed with very weak intensity in Figure 4, which initially increases and then decreases in intensity over time. This peak in Figure S32 does not originate from a CH3OH-derived intermediate as observed at ~60.5 ppm in Figure 4 within the region highlighted red because Figure S32 was collected with unlabeled CH3OH, as even liquid-phase CH3OH appears hardly visible on Figure S32. Instead, the peak at ~62 ppm likely originates from the terminal alcohol bound to the zeolite surface, as predicted with the DFT peak shifts in Table S9. Therefore, the faster reaction rate in Figure S32 coincides with the easier observation of the full process of terminal alcohol formation (first discussed in Section S11.1). The secondary carbocation (~63 ppm) and bound terminal alcohol (~62 ppm) appear in the initial scans, with a greater intensity for the secondary carbocation that suggests the carbocation initially forms and then converts to the terminal alcohol. The liquid-phase terminal alcohol (~67 ppm) then appears and increases in intensity in the later scans, with a subsequent decrease of intensity for the bound terminal alcohol peak that shows desorption of the formed product over time. The secondary carbocation peak maintains the strongest intensity of the three peaks throughout the reaction, demonstrating consistent coverage of the active sites with this intermediate. Despite the differences in intensity of the product and reactant features, the ring-opening product peaks evolve in a very similar distribution for Figures 4 and S32. This suggests that the method of initiating the reaction does not affect the intrinsic behavior or regioselectivity of the reaction, but instead allows for control of the reaction rate and monitoring of specific intermediate and product peaks.

**
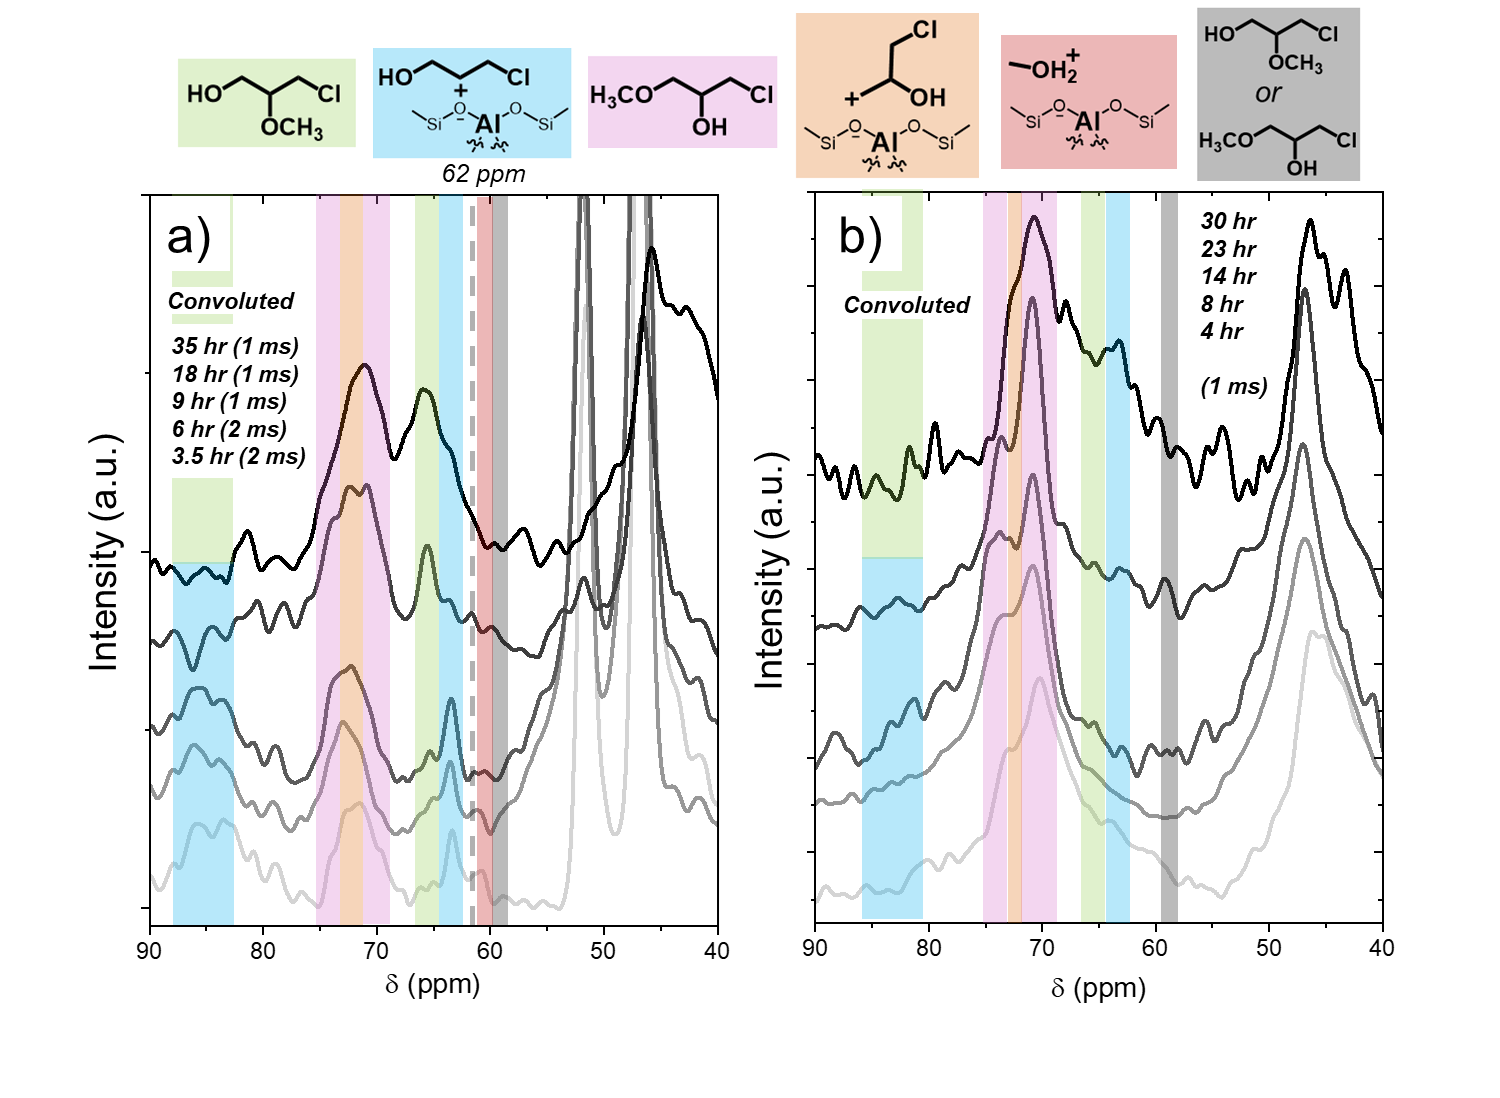
Figure S33**. 13C NMR cross-polarization spectra during ring-opening of C3H5ClO with CH3OH over a) Al-BEA and b) Sn-BEA, where reaction was initiated by adding all components to the rotor at once (0.2 M 13C3H5ClO, 0.2 M CH3OH, CH3CN, 298 K). Contact times are shown in parentheses; the contact time was 1 ms for all spectra in Sn-BEA. Spectra are an average of scans, ranging from 2564 to 10,094 scans. *Note: these spectra were collected with unlabeled CH3OH, so CH3OH-derived features appear much less intensely.*

Figure S33 shows the cross-polarization spectra that correspond to the single-pulse spectra in Figure S32, in which all components were added to the rotor to initiate the reaction (0.2 M CH3OH). These spectra demonstrate the growth of the carbocation intermediate and ring-opened product species on the surface, as most clearly demonstrated for terminal alcohol over Al-BEA in Figure 33a. The growth patterns of the secondary carbocation (~63 ppm), bound terminal alcohol (~62 ppm), and liquid-phase terminal alcohol (~67 ppm) align with those described in Figure S32 and show the sequence of carbocation formation, product formation, and product desorption. The appearance of the peak at ~67 ppm that we attribute to the liquid-phase terminal alcohol is unexpected in the cross-polarization spectra but resembles the observation of liquid-phase C3H3ClO features from Figure 2 of the main text. We attribute this to desorbed terminal alcohol product species that remain near the zeolite surface. Figure S33 shows very similar peak growth trends to those shown in Figure S29, where the reaction was initiated by adding C3H5ClO.

**S11.6. Kinetic Comparisons from Batch Reactions and *Operando* 13C NMR**

| **Al-BEA** | **Batch Kinetics** | | ***Operando* 13C NMR** | |
| --- | --- | --- | --- | --- |
| [CH3OH] | Product Formation Rate  (mol C4H9ClO2) • (mol M • s)-1) |  | Product Formation Rate  (mol C4H9ClO2) • (mol M • s)-1) |  |
| 0.2 M | 5.31 x 10-4 | 6.9 | 2.42 x 10-5 | 5.4 |
| 6 M | 5.63 x 10-3 | 15.3 | 4.58 x 10-4 | 11.6 |

**Table S11**. Comparisons of calculated total product formation rates and β values obtained from batch kinetics and *operando* 13C NMR measurements for C3H5ClO ring-opening over Al-BEA (0.2 M C3H5ClO, CH3CN, 298 K).

| **Sn-BEA** | **Batch Kinetics** | | ***Operando* 13C NMR** | |
| --- | --- | --- | --- | --- |
| [CH3OH] | Product Formation Rate  (mol C4H9ClO2) • (mol M • s)-1) |  | Product Formation Rate  (mol C4H9ClO2) • (mol M • s)-1) |  |
| 0.2 M | 1.42 x 10-3 | 12.1 | 5.96 x 10-5 | 9.0 |
| 6 M | 6.38 x 10-3 | 28.5 | 5.18 x 10-4 | 22.7 |

**Table S12**. Comparisons of calculated total product formation rates and β values obtained from batch kinetics and *operando* 13C NMR measurements for C3H5ClO ring-opening over Sn-BEA (0.2 M C3H5ClO, CH3CN, 298 K).

The concentration-time profiles for the NMR spectra from Figures 5 and 6 were used to measure product formation turnover rates and regioselectivities (β) for the ring-opening reaction in the NMR rotor. The concentrations were used to calculate turnover numbers for each time point in the NMR experiment, and a polynomial was fit to the plots of turnover number as a function of time. This procedure matches the method used to calculate turnover rates from the batch reactions (see Section 4.3).

Tables S11 and S12 show that the reaction rates are 10-25 times lower in the NMR than in the glass batch reactors used for the data in Figure 1. The lower rates are likely due to differences in the agitation mechanism between the systems; a stir bar directly agitates the mixture in the batch reactors, while the NMR rotor indirectly agitates the mixture by spinning. The significant differences in spin rate between the two experiments (700 rpm for batch reactions, ~4400 Hz (or ~250,000 rpm) for the NMR rotor)) and the different catalyst to volume ratio (typically ~1 g mL-1 for batch reactions, ~250 for NMR experiments) may also contribute to the observed differences in rates.

Despite the rate differences, the NMR experiments and batch reactions show very similar β values at each [CH3OH] for both catalysts. Interestingly, the NMR experiments do consistently show slightly lower β values than the batch reactions. We believe this may originate from the NMR experiments being run to higher conversions, which may affect the reaction environment or concentration of surface-bound species in a way that promotes the terminal alcohol product over the terminal ether.

While the differences in spin rate, catalyst-to-volume ratio, and reaction conversion prevent exact comparisons between the NMR experiments and batch reactions, the qualitative regioselectivity agreement between these experiments supports that the NMR experiments capture the intrinsic behavior of the C3H5ClO ring-opening reaction.**S11.7. Comparison of Regioselectivity Trends for C3H5ClO and C4H8O Ring-Opening**

The combination of kinetic and spectroscopic data presented in the main text provides evidence that changes in the reaction mechanism drive significant differences in reaction regioselectivity for C3H5ClO ring-opening. Interestingly, β values over Al-BEA and Sn-BEA materials depend much less strongly on [CH3OH] for the ring-opening of 1,2-epoxybutane (C4H8O, 0.7 – 1.6)51 than for C3H5ClO (1 – 40) over *BEA zeolites. Our previous work on 1,2-epoxybutane argued that decreases in β with increasing [CH3OH] originated from CH3OH molecules stabilizing the transition state for TA formation through hydrogen bonding.51 The differences between C4H8O and C3H5ClO suggest that mechanistic differences play a much less significant role in regioselectivity changes for C4H8O ring-opening. The SN1 reaction pathway may dominate during C4H8O ring-opening, leading to only minor changes in β with [CH3OH] primarily driven by hydrogen-bonding effects through changes in . The apparent dominance of the SN2 pathway and more significant differences in β for C3H5ClO than C4H8O may originate from several possibilities (Scheme S4). First, the SN1 reaction pathway likely proceeds less favorably for C3H5ClO than C4H8O. The electron-withdrawing terminal Cl atom in C3H5ClO destabilizes positive charge, while the electron-donating terminal methyl (-CH3) group in C4H8O stabilizes positive charge. Therefore, the ring-opened carbocations likely form more easily from C4H8O, making the SN1 reaction more favorable for C4H8O through larger values of and . Second, electron-withdrawing groups like Cl increase the rates of SN2 reactions by withdrawing electron density from the site of nucleophilic attack,57-58 which would increase values of and for C3H5ClO compared to C4H8O ring-opening. Furthermore, the presence of the Cl atom may promote TE formation through the SN2 reaction more significantly than the expected effect from steric hindrance. Cl may stabilize CH3OH through halogen bonding, drawing CH3OH from the proximal secondary epoxide carbon atom and further hindering the formation of TA. To summarize, the different regioselectivity trends between C3H5ClO and C4H8O suggest that functional groups on epoxides lead to mechanistic differences that significantly influence product distribution from ring-opening.

**S11.8. Uncertainties and Limitations of 13C NMR Experiments**


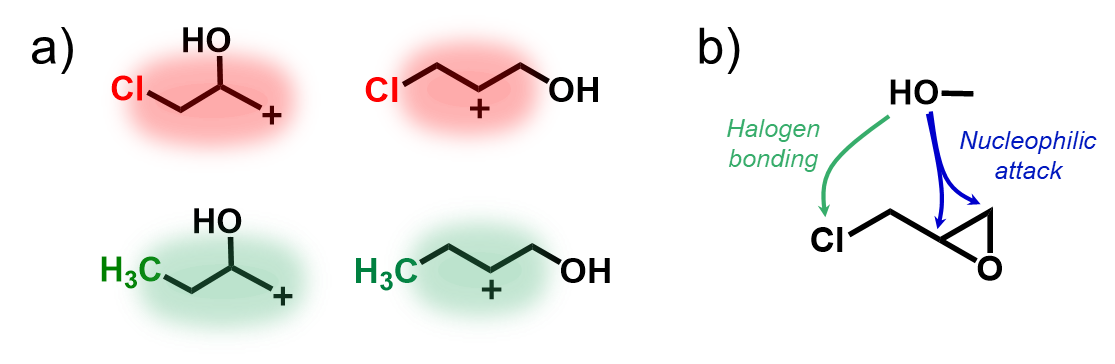


**Scheme S4**. Visual depictions for a) inductive effect of functional groups from C3H5ClO and C4H8O on ring-opened carbocations and b) possible binding sites of CH3OH on C3H5ClO.

While the NMR spectra described in this contribution provide valuable insight into the reaction pathway for C3H5ClO ring-opening, several uncertainties remain. First, the NMR experiments provide evidence for the SN1 pathway through the formation of the ring-opened carbocations but do not show direct evidence for SN2 reaction pathways occurring. However, the differences in β with [CH3OH] strongly suggest that multiple reaction pathways can occur, as we do not expect differences in [CH3OH] would affect the ratio of primary to secondary ring-opened carbocations by orders of magnitude. Second, the identity of the adsorbed intermediates for an SN2 reaction pathway remains unclear. We propose an SN1 reaction through a C3H5ClO-derived intermediate and SN2 pathway with a CH3OH-derived intermediate based on the observed reaction orders (Table S5) and previous mechanistic proposals for C3H5ClO ring-opening over *BEA zeolites with CH3OH59 and allyl alcohol.60 However, we cannot rule out that ring-opening through a C3H5ClO-derived intermediate may also proceed by an SN2 reaction. Despite the unclear nature of a possible SN2 reaction pathway, steric effects should drive the strong preference toward the TE product. Lastly, the differences in reactivity between the primary and secondary carbocations and how the reactivity of these species changes with [CH3OH] have not been established. These differences would provide valuable insight into how changing [CH3OH] affects the regioselectivity for the SN1 pathway and the competition between SN1 and SN2 reactions, but the NMR spectra cannot provide this information.

**References**

1. Filatova, E. O.; Konashuk, A. S., Interpretation of the changing the band gap of Al2O3 depending on its crystalline form: connection with different local symmetries. *The Journal of Physical Chemistry C* **2015,** *119* (35), 20755-20761.

2. Mo, S. D.; Xu, Y. N.; Ching, W. Y., Electronic and Structural Properties of Bulk γ‐Al2O3. *Journal of the American Ceramic Society* **1997,** *80* (5), 1193-1197.

3. Zhao, Z.; Xu, S.; Hu, M. Y.; Bao, X.; Peden, C. H.; Hu, J., Investigation of aluminum site changes of dehydrated zeolite H-beta during a rehydration process by high-field solid-state NMR. *The Journal of Physical Chemistry C* **2015,** *119* (3), 1410-1417.

4. van Bokhoven, J. A.; Van der Eerden, A.; Koningsberger, D., Flexible aluminium coordination of zeolites as function of temperature and water content, an in-situ method to determine aluminium coordinations. In *Studies in surface science and catalysis*, Elsevier: 2002; Vol. 142, pp 1885-1890.

5. Wouters, B.; Chen, T.-H.; Grobet, P., Reversible tetrahedral− octahedral framework aluminum transformation in zeolite Y. *Journal of the American Chemical Society* **1998,** *120* (44), 11419-11425.

6. Jiao, J.; Wang, W.; Sulikowski, B.; Weitkamp, J.; Hunger, M., 29Si and 27Al MAS NMR characterization of non-hydrated zeolites Y upon adsorption of ammonia. *Microporous and mesoporous materials* **2006,** *90* (1-3), 246-250.

7. Ravi, M.; Sushkevich, V. L.; van Bokhoven, J. A., On the location of Lewis acidic aluminum in zeolite mordenite and the role of framework-associated aluminum in mediating the switch between Brønsted and Lewis acidity. *Chemical Science* **2021,** *12* (11), 4094-4103.

8. Mihailova, B.; Valtchev, V.; Mintova, S.; Faust, A. C.; Petkov, N.; Bein, T., Interlayer stacking disorder in zeolite beta family: a Raman spectroscopic study. *Physical Chemistry Chemical Physics* **2005,** *7* (14), 2756.

9. Tosheva, L.; Mihailova, B.; Valtchev, V.; Sterte, J., Zeolite beta spheres. *Microporous and Mesoporous Materials* **2001,** *48* (1-3), 31-37.

10. Majano, G.; Mintova, S.; Ovsitser, O.; Mihailova, B.; Bein, T., Zeolite Beta nanosized assemblies. *Microporous and Mesoporous Materials* **2005,** *80* (1-3), 227-235.

11. Inagaki, S.; Nakatsuyama, K.; Saka, Y.; Kikuchi, E.; Kohara, S.; Matsukata, M., Elucidation of Medium-Range Structure in a Dry Gel-Forming *BEA-Type Zeolite. *The Journal of Physical Chemistry C* **2007,** *111* (28), 10285-10293.

12. Yu, Y.; Xiong, G.; Li, C.; Xiao, F.-S., Characterization of aluminosilicate zeolites by UV Raman spectroscopy. *Microporous and Mesoporous Materials* **2001,** *46* (1), 23-34.

13. Knops-Gerrits, P.-P.; De Vos, D. E.; Feijen, E. J.; Jacobs, P. A., Raman spectroscopy on zeolites. *Microporous Materials* **1997,** *8* (1-2), 3-17.

14. Aminzadeh, A., Excitation frequency dependence and fluorescence in the Raman spectra of Al2O3. *Applied spectroscopy* **1997,** *51* (6), 817-819.

15. Porto, S.; Krishnan, R., Raman effect of corundum. *The Journal of Chemical Physics* **1967,** *47* (3), 1009-1012.

16. Aminzadeh, A.; Sarikhani-Fard, H., Raman spectroscopic study of Ni/Al2O3 catalyst. *Spectrochimica Acta Part A: Molecular and Biomolecular Spectroscopy* **1999,** *55* (7-8), 1421-1425.

17. Zuo, J.; Xu, C.; Liu, X.; Wang, C.; Wang, C.; Hu, Y.; Qian, Y., Study of the Raman spectrum of nanometer SnO2. *Journal of applied physics* **1994,** *75* (3), 1835-1836.

18. Scott, J., Raman spectrum of SnO2. *The Journal of Chemical Physics* **1970,** *53* (2), 852-853.

19. Leonardy, A.; Hung, W.-Z.; Tsai, D.-S.; Chou, C.-C.; Huang, Y.-S., Structural features of SnO2 nanowires and raman spectroscopy analysis. *Crystal Growth and Design* **2009,** *9* (9), 3958-3963.

20. Scarano, D.; Zecchina, A.; Bordiga, S.; Geobaldo, F.; Spoto, G.; Petrini, G.; Leofanti, G.; Padovan, M.; Tozzola, G., Fourier-transform infrared and Raman spectra of pure and Al-, B-, Ti- and Fe-substituted silicalites: stretching-mode region. *Journal of the Chemical Society, Faraday Transactions* **1993,** *89* (22), 4123.

21. Blasco, T.; Camblor, M. A.; Corma, A.; Esteve, P.; Guil, J. M.; Martinez, A.; Perdigon-Melon, J. A.; Valencia, S., Direct synthesis and characterization of hydrophobic aluminum-free Ti-beta zeolite. *Journal of Physical Chemistry B* **1998,** *102*, 75-88.

22. Mihailova, B.; Valtchev, V.; Mintova, S.; Faust, A.-C.; Petkov, N.; Bein, T., Interlayer stacking disorder in zeolite beta family: a Raman spectroscopic study. *Physical chemistry chemical physics* **2005,** *7* (14), 2756-2763.

23. Ricchiardi, G.; Damin, A.; Bordiga, S.; Lamberti, C.; Spanò, G.; Rivetti, F.; Zecchina, A., Vibrational Structure of Titanium Silicate Catalysts. A Spectroscopic and Theoretical Study. *Journal of the American Chemical Society* **2001,** *123* (46), 11409-11419.

24. Bordiga, S.; Damin, A.; Bonino, F.; Ricchiardi, G.; Zecchina, A.; Tagliapietra, R.; Lamberti, C., Resonance Raman effects in TS-1: the structure of Ti(iv) species and reactivity towards H2O, NH3 and H2O2: an in situ studyPresented at the International Congress on Operando Spectroscopy, Lunteren, The Netherlands, March 2-6, 2003. *Physical Chemistry Chemical Physics* **2003,** *5* (20), 4390.

25. Signorile, M.; Crocellà, V.; Damin, A.; Rossi, B.; Lamberti, C.; Bonino, F.; Bordiga, S., Effect of Ti Speciation on Catalytic Performance of TS-1 in the Hydrogen Peroxide to Propylene Oxide Reaction. *The Journal of Physical Chemistry C* **2018,** *122* (16), 9021-9034.

26. Li, C.; Xiong, G.; Liu, J.; Ying, P.; Xin, Q.; Feng, Z., Identifying Framework Titanium in TS-1 Zeolite by UV Resonance Raman Spectroscopy. *The Journal of Physical Chemistry B* **2001,** *105* (15), 2993-2997.

27. Newsam, J. M.; Treacy, M. M. J.; Koetsier, W. T.; Gruyter, C. B. D., Structural characterization of zeolite beta. *Proceedings of the Royal Society of London. A. Mathematical and Physical Sciences* **1988,** *420* (1859), 375-405.

28. Vega-Vila, J. C.; Harris, J. W.; Gounder, R., Controlled insertion of tin atoms into zeolite framework vacancies and consequences for glucose isomerization catalysis. *Journal of Catalysis* **2016,** *344*, 108-120.

29. Penzien, J.; Abraham, A.; van Bokhoven, J. A.; Jentys, A.; Müller, T. E.; Sievers, C.; Lercher, J. A., Generation and characterization of well-defined Zn2+ Lewis acid sites in ion exchanged zeolite BEA. *The Journal of Physical Chemistry B* **2004,** *108* (13), 4116-4126.

30. Pelmenschikov, A.; Van Santen, R.; Janchen, J.; Meijer, E., Acetonitrile-d3 as a probe of Lewis and Broensted acidity of zeolites. *The Journal of Physical Chemistry* **1993,** *97* (42), 11071-11074.

31. Wichterlová, B.; Tvarůžková, Z.; Sobalık, Z.; Sarv, P., Determination and properties of acid sites in H-ferrierite: A comparison of ferrierite and MFI structures. *Microporous and mesoporous materials* **1998,** *24* (4-6), 223-233.

32. Boronat, M.; Concepción, P.; Corma, A.; Renz, M.; Valencia, S., Determination of the catalytically active oxidation Lewis acid sites in Sn-beta zeolites, and their optimisation by the combination of theoretical and experimental studies. *Journal of Catalysis* **2005,** *234* (1), 111-118.

33. Bermejo-Deval, R.; Orazov, M.; Gounder, R.; Hwang, S.-J.; Davis, M. E., Active Sites in Sn-Beta for Glucose Isomerization to Fructose and Epimerization to Mannose. *ACS Catalysis* **2014,** *4* (7), 2288-2297.

34. Harris, J. W.; Cordon, M. J.; Di Iorio, J. R.; Vega-Vila, J. C.; Ribeiro, F. H.; Gounder, R., Titration and quantification of open and closed Lewis acid sites in Sn-Beta zeolites that catalyze glucose isomerization. *Journal of Catalysis* **2016,** *335*, 141-154.

35. Courtney, T. D.; Chang, C.-C.; Gorte, R. J.; Lobo, R. F.; Fan, W.; Nikolakis, V., Effect of water treatment on Sn-BEA zeolite: Origin of 960 cm− 1 FTIR peak. *Microporous and Mesoporous Materials* **2015,** *210*, 69-76.

36. Sushkevich, V. L.; Kots, P. A.; Kolyagin, Y. G.; Yakimov, A. V.; Marikutsa, A. V.; Ivanova, I. I., Origin of water-induced Brønsted acid sites in Sn-BEA zeolites. *The Journal of Physical Chemistry C* **2019,** *123* (9), 5540-5548.

37. Montejo-Valencia, B. D.; Salcedo-Pérez, J. L.; Curet-Arana, M. C., DFT study of closed and open sites of BEA, FAU, MFI, and BEC zeolites substituted with tin and titanium. *The Journal of Physical Chemistry C* **2016,** *120* (4), 2176-2186.

38. Bukowski, B. C.; Bates, J. S.; Gounder, R.; Greeley, J., First principles, microkinetic, and experimental analysis of Lewis acid site speciation during ethanol dehydration on Sn-Beta zeolites. *Journal of Catalysis* **2018,** *365*, 261-276.

39. Bukowski, B. C.; Greeley, J., Scaling relationships for molecular adsorption and dissociation in Lewis acid zeolites. *The Journal of Physical Chemistry C* **2016,** *120* (12), 6714-6722.

40. Ward, J. W., A spectroscopic study of the surface of zeolite Y: the adsorption of pyridine. *Journal of Colloid and Interface Science* **1968,** *28* (2), 269-278.

41. Lefrancois, M.; Malbois, G., The nature of the acidic sites on mordenite: Characterization of adsorbed pyridine and water by infrared study. *Journal of Catalysis* **1971,** *20* (3), 350-358.

42. Cannings, F. R., Acidic sites on mordenite: an infrared study of adsorbed pyridine. *The Journal of Physical Chemistry* **1968,** *72* (13), 4691-4693.

43. Kataoka, T.; Dumesic, J., Acidity of unsupported and silica-supported vanadia, molybdena, and titania as studied by pyridine adsorption. *Journal of Catalysis* **1988,** *112* (1), 66-79.

44. Parry, E., An infrared study of pyridine adsorbed on acidic solids. Characterization of surface acidity. *Journal of Catalysis* **1963,** *2* (5), 371-379.

45. Barzetti, T.; Selli, E.; Moscotti, D.; Forni, L., Pyridine and ammonia as probes for FTIR analysis of solid acid catalysts. *Journal of the Chemical Society, Faraday Transactions* **1996,** *92* (8), 1401-1407.

46. Sushkevich, V. L.; Ivanova, I. I.; Yakimov, A. V., Revisiting acidity of SnBEA catalysts by combined application of FTIR spectroscopy of different probe molecules. *The Journal of Physical Chemistry C* **2017,** *121* (21), 11437-11447.

47. Palomino, G. T.; Pascual, J. J. C.; Delgado, M. R.; Parra, J. B.; Areán, C. O., FT-IR studies on the acidity of gallium-substituted mesoporous MCM-41 silica. *Materials chemistry and physics* **2004,** *85* (1), 145-150.

48. Murphy, B. M.; Letterio, M. P.; Xu, B., Selectivity Control in the Catalytic Dehydration of Methyl Lactate: The Effect of Pyridine. *ACS Catalysis* **2016,** *6* (8), 5117-5131.

49. van der Graaff, W. N.; Li, G.; Mezari, B.; Pidko, E. A.; Hensen, E. J., Synthesis of Sn‐Beta with Exclusive and High Framework Sn Content. *ChemCatChem* **2015,** *7* (7), 1152-1160.

50. Yuan, E.; Dai, W.; Wu, G.; Guan, N.; Hunger, M.; Li, L., Facile synthesis of Sn-containing MFI zeolites as versatile solid acid catalysts. *Microporous and Mesoporous Materials* **2018,** *270*, 265-273.

51. Potts, D. S.; Komar, J. K.; Locht, H.; Flaherty, D. W., Understanding Rates and Regioselectivities for Epoxide Methanolysis within Zeolites: Mechanism and Roles of Covalent and Non-covalent Interactions. *ACS Catalysis* **2023,** *13*, 14928-14944.

52. Potts, D. S.; Komar, J. K.; Jacobson, M. A.; Locht, H.; Flaherty, D. W., Consequences of Pore Polarity and Solvent Structure on Epoxide Ring-Opening in Lewis and Brønsted Acid Zeolites. *JACS Au* **2024,** *4* (9), 3501-3518.

53. Anslyn, E. V.; Dougherty, D. A., Modern Physical Organic Chemistry. University Science: 2005; pp 374-377.

54. Goldberg, R. N.; Kishore, N.; Lennen, R. M., Thermodynamic Quantities for the Ionization Reactions of Buffers. *Journal of Physical and Chemical Reference Data* **2002,** *31* (2), 231-370.

55. Berg, R. L.; Vanderzee, C. E., Enthalpies of dilution of sodium carbonate and sodium hydrogen carbonate solutions, and the standard enthalpies of ionization of aqueous carbonic acid, at 298.15 K. *The Journal of Chemical Thermodynamics* **1978,** *10* (11), 1049-1075.

56. Das, A.; Das, U.; Das, A. K., Relativistic effects on the chemical bonding properties of the heavier elements and their compounds. *Coordination Chemistry Reviews* **2023,** *479*, 215000.

57. Tyagi, A.; Yadav, N.; Khan, J.; Mondal, S.; Hazra, C. K., Brønsted Acid‐Catalysed Epoxide Ring‐Opening Using Amine Nucleophiles: A Facile Access to β‐Amino Alcohols. *Chemistry–An Asian Journal* **2022,** *17* (14), e202200379.

58. Ashenhurst, J. The SN2 Mechanism. <https://www.masterorganicchemistry.com/2012/07/04/the-sn2-mechanism/> (accessed June 3rd, 2024).

59. Deshpande, N.; Parulkar, A.; Joshi, R.; Diep, B.; Kulkarni, A.; Brunelli, N. A., Epoxide ring opening with alcohols using heterogeneous Lewis acid catalysts: Regioselectivity and mechanism. *Journal of Catalysis* **2019,** *370*, 46-54.

60. Selvin, R.; Roselin, S. L.; Kumar, P. K.; Arul, S., Nanocrystalline Zeolite Beta: An Efficient Catalyst for The Regioselective Alcoholysis of Epichlorohydrin. *Science of Advanced Materials* **2010,** *2* (2), 190-194.
